# Supplementary material for: Silver-catalyzed carbon–phosphorus functionalization of N-(p-methoxyaryl)propiolamides coupled with dearomatization: access to phosphorylated aza-decenones
Source: Royal Society of Chemistry journal article supplement (doi:10.1039/c4cc06923d), 2014-09-22
Supplement: c4cc06923d1.pdf [file c4cc06923d1.pdf]

## Supporting Information

### Silver-Catalyzed Carbon-Phosphorus Functionalization of *N*-(*p*-Methoxyaryl)propiolamides Coupled with Dearomatization: Access to Phosphorylated Aza-decenones

Li-Jing Wang, An-Qi Wang, Yu Xia, Xin-Xing Wu, Xue-Yuan Liu and Yong-Min Liang\*

State Key Laboratory of Applied Organic Chemistry, Lanzhou University 730000,  
P.R. China.

e-mail: [liangym@lzu.edu.cn](mailto:liangym@lzu.edu.cn)

#### Table of Contents

|   |                                                                                  |     |
|---|----------------------------------------------------------------------------------|-----|
| 1 | General experimental procedures                                                  | S2  |
| 2 | Starting materials                                                               | S2  |
| 3 | Characterization Data of 1a and 1e-1u                                            | S3  |
| 4 | Typical procedure for the preparation of product 3a                              | S8  |
| 5 | Characterization Data of 3a-3r and 3t-3u                                         | S8  |
| 6 | X-ray diffraction analysis of compound 3a                                        | S16 |
| 7 | The <sup>1</sup> H, <sup>13</sup> C and <sup>31</sup> P NMR spectra of compounds | S17 |

## General experimental procedures

Column chromatography was carried out on silica gel.  $^1\text{H}$  NMR spectra were recorded on 400 MHz in  $\text{CDCl}_3$ ,  $^{13}\text{C}$  NMR spectra were recorded on 100 MHz in  $\text{CDCl}_3$  and  $^{31}\text{P}$  NMR spectra were recorded on 160 MHz in  $\text{CDCl}_3$ . Chemical shifts (ppm) were recorded with tetramethylsilane (TMS) as the internal reference standard. Multiplicities are given as: s (singlet), d (doublet), t (triplet), dd (doublet of doublets), or m (multiplet). IR spectra were recorded on a FT-IR spectrometer and only major peaks are reported in  $\text{cm}^{-1}$ . Melting points were determined on a microscopic apparatus and were uncorrected. All products were further characterized by high resolution MS; copies of their  $^1\text{H}$  NMR,  $^{13}\text{C}$  NMR and  $^{31}\text{P}$  NMR spectra are provided in the Supporting Information. Commercially available reagents and solvents were used without further purification.  $\text{CH}_3\text{CN}$  was dried over calcium hydride.

## Starting materials

For this study, all substrates **1** were synthesized according to the literature by a modification of the procedure<sup>[1]</sup>.

### Method A<sup>[1a]</sup>: Synthesis of **1a-q** and **1s-u**

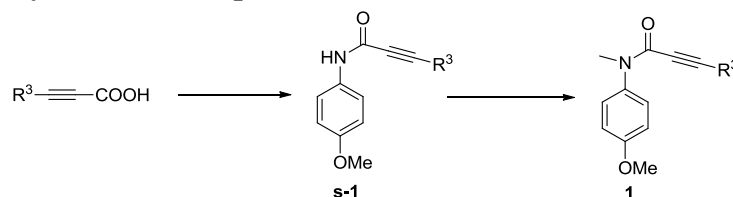

(a) For the synthesis of **s-1a**: To a stirred solution of 3-phenylpropionic acid (438 mg, 3.00 mmol) and 4-methylmorpholine (455.2 mg, 4.50 mmol) in THF (20 mL) was added isobutyl chloroformate (491.7 mg, 3.60 mmol) in THF (3 mL) at 0 °C, and the mixture was stirred at 0 °C for 0.5 h. 4-methoxyaniline (381.3 mg, 3.10 mmol) in THF (2 mL) was added to the solution at 0 °C, and the mixture was stirred at 0 °C for 1 h and at room temperature for 16 h. The reaction was quenched with water and extracted with  $\text{CH}_2\text{Cl}_2$ . The organic layer was washed with brine, dried over  $\text{Na}_2\text{SO}_4$ , and concentrated to furnish the corresponding crude amide **s-1a**.

(b) For the synthesis of **1a**: To a suspension of 55% sodium hydride (180.0 mg, 4.50 mmol) in THF (12 mL) was added the crude amide **s-1a** (753 mg, 3.0 mmol) in THF (12 mL) at 0 °C, and the mixture was stirred at 0 °C for 0.5 h.  $\text{CH}_3\text{I}$  (639 mg, 4.50 mmol) in THF (1.5 mL) was added to the solution at 0 °C, and the mixture was stirred at 0 °C for 0.5 h and at room temperature for 2 h. The residue was purified by a silica gel column chromatography to give **1a** (715.5 mg, 2.70 mmol) in 90% yield from 3-phenylpropionic acid. The above reactions were carried out under an atmosphere of argon.

### Method B<sup>[1b]</sup>: Synthesis of **1r**

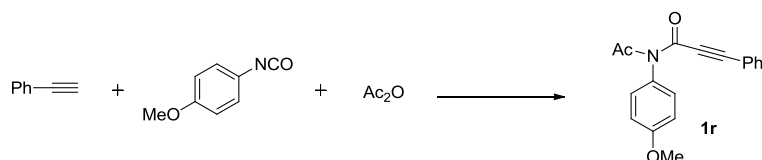

In a heat gun dried and nitrogen filled Schlenk flask 1.1 equiv. of ethynylbenzene were dissolved in THF and cooled to  $-78^{\circ}\text{C}$ . At this temperature 1.0 equiv. of *n*-BuLi (2.5 M in hexane) were slowly added by syringe, then, the solution was stirred for 30 min and subsequently treated with 1.0 equiv. of 1-isocyanato-4-methoxybenzene, dissolved in a small amount of THF and allowed to warm up to  $-40^{\circ}\text{C}$  within 2 h. At this temperature 1.1 equiv. of  $\text{Ac}_2\text{O}$  dissolved in a small amount of THF were added and the solution was allowed to warm to rt over night. For work up a saturated aqueous solution of  $\text{NH}_4\text{Cl}$  was added, the organic layer was separated and the aqueous phases were extracted three times with diethyl ether. The combined organic phases were dried with  $\text{MgSO}_4$ , filtered and, finally, the solvents were removed in vacuum. Column chromatography on silica (petroleum/ethyl acetate) afforded the products **1r**.

Note: All substrates **1** exist as a 6:1-10:1 mixture of rotamers and the spectroscopic datas of their major rotamers are reported.

### Characterization Data of **1a** and **1e-1u**

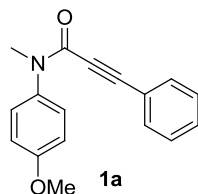

***N*-(4-methoxyphenyl)-*N*-methyl-3-phenylpropionamide **1a**.** Eluent: petroleum ether/ethyl acetate (20:1). Yield 2.70mmol (90%), light yellow solid.  $^1\text{H}$  NMR ( $\text{CDCl}_3$ , 400 MHz)  $\delta$  7.34-7.29 (m, 1H), 7.27-7.22 (m, 4H), 7.17 (dd,  $J = 8.4\text{Hz}$ ,  $J = 1.2\text{Hz}$ , 2H), 6.97-6.92 (m, 2H), 3.84 (s, 3H), 3.34 (s, 3H).  $^{13}\text{C}$  NMR ( $\text{CDCl}_3$ , 100 MHz)  $\delta$  159.0, 154.5, 136.0, 132.3, 129.7, 128.4, 128.2, 120.4, 114.2, 90.7, 82.6, 55.5, 36.4. IR (neat,  $\text{cm}^{-1}$ ): 3342, 3065, 2968, 2838, 2540, 2364, 2218, 2050, 1950, 1874, 1743, 1634, 1511, 1374, 1251, 1122, 1028, 921, 810, 756, 650, 595, 535, 415.

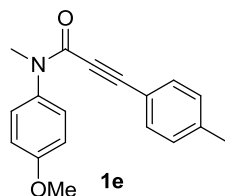

***N*-(4-methoxyphenyl)-*N*-methyl-3-(*p*-tolyl)propionamide **1e**.** Eluent: petroleum ether/ethyl acetate (20:1). Yield 2.76mmol (92%), light yellow solid.  $^1\text{H}$  NMR ( $\text{CDCl}_3$ , 400 MHz)  $\delta$  7.26 (d,  $J = 9.2\text{Hz}$ , 2H), 7.08-7.03 (m, 4H), 6.94 (d,  $J = 8.8\text{Hz}$ , 2H), 3.84 (s, 3H), 3.34 (s, 3H), 2.30 (s, 3H).  $^{13}\text{C}$  NMR ( $\text{CDCl}_3$ , 100 MHz)  $\delta$  158.9, 154.6, 140.3, 136.1, 132.3, 129.0, 128.5, 117.4, 114.2, 91.2, 82.2, 55.5, 36.4, 21.5. IR (neat,  $\text{cm}^{-1}$ ): 3449, 2956, 2838, 2546, 2362, 2213, 1910, 1635, 1511, 1442, 1374, 1249, 1180, 1122, 1031, 914, 818, 730, 628, 554, 426.

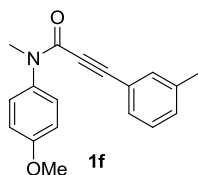

***N*-(4-methoxyphenyl)-*N*-methyl-3-(*m*-tolyl)propiolamide 1f.** Eluent: petroleum ether/ethyl acetate (20:1). Yield 2.68mmol (89%), light yellow liquid.  $^1\text{H}$  NMR ( $\text{CDCl}_3$ , 400 MHz)  $\delta$  7.27-7.25 (m, 2H), 7.13-7.12 (m, 2H), 7.00-6.94 (m, 4H), 3.85 (s, 3H), 3.35 (s, 3H), 2.25 (s, 3H).  $^{13}\text{C}$  NMR ( $\text{CDCl}_3$ , 100 MHz)  $\delta$  159.0, 154.6, 138.4, 136.2, 132.9, 130.7, 129.4, 128.5, 128.1, 120.3, 114.3, 91.2, 82.4, 55.5, 36.5, 21.0. IR (neat,  $\text{cm}^{-1}$ ): 3487, 3043, 2955, 2839, 2546, 2367, 2209, 1947, 1793, 1638, 1511, 1442, 1372, 1293, 1179, 1057, 950, 882, 787, 690, 567, 522, 444.

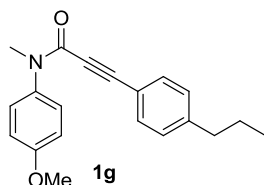

***N*-(4-methoxyphenyl)-*N*-methyl-3-(4-propylphenyl)propiolamide 1g.** Eluent: petroleum ether/ethyl acetate (20:1). Yield 2.39 mmol (80%), light yellow liquid.  $^1\text{H}$  NMR ( $\text{CDCl}_3$ , 400 MHz)  $\delta$  7.25 (d,  $J = 8.8\text{Hz}$ , 2H), 7.07 (dd,  $J = 17.6\text{Hz}$ ,  $J = 8.4\text{Hz}$ , 4H), 6.94 (d,  $J = 8.8\text{Hz}$ , 2H), 3.84 (s, 3H), 3.34 (s, 3H), 2.53 (t,  $J = 7.6\text{Hz}$ , 2H), 1.62-1.53 (m, 2H), 0.89 (t,  $J = 7.2\text{Hz}$ , 3H).  $^{13}\text{C}$  NMR ( $\text{CDCl}_3$ , 100 MHz)  $\delta$  158.9, 154.6, 145.0, 136.1, 132.3, 128.5, 128.4, 117.6, 114.2, 91.3, 82.2, 55.4, 37.9, 36.4, 24.0, 13.6. IR (neat,  $\text{cm}^{-1}$ ): 3408, 3000, 2932, 2839, 2367, 2213, 1914, 1799, 1709, 1637, 1511, 1463, 1374, 1292, 1205, 1121, 1031, 913, 837, 801, 731, 630, 544.

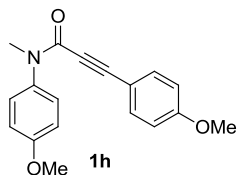

***N*,3-bis(4-methoxyphenyl)-*N*-methylpropiolamide 1h.** Eluent: petroleum ether/ethyl acetate (20:1). Yield 2.22 mmol (74%), light yellow solid.  $^1\text{H}$  NMR ( $\text{CDCl}_3$ , 400 MHz)  $\delta$  7.28-7.25 (m, 2H), 7.11 (d,  $J = 9.2\text{Hz}$ , 2H), 6.95 (d,  $J = 8.8\text{Hz}$ , 2H), 6.75 (d,  $J = 8.8\text{Hz}$ , 2H), 3.85 (s, 3H), 3.80 (s, 3H), 3.34 (s, 3H).  $^{13}\text{C}$  NMR ( $\text{CDCl}_3$ , 100 MHz)  $\delta$  160.8, 158.9, 154.8, 136.2, 134.1, 128.5, 114.2, 113.9, 112.3, 91.4, 82.0, 55.5, 55.2, 36.4. IR (neat,  $\text{cm}^{-1}$ ): 3455, 3046, 2935, 2839, 2429, 2210, 1888, 1633, 1512, 1442, 1375, 1293, 1173, 1108, 1030, 912, 814, 731, 646, 563, 502.

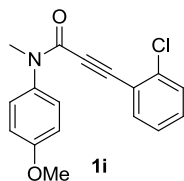

**3-(2-chlorophenyl)-*N*-(4-methoxyphenyl)-*N*-methylpropiolamide 1i.** Eluent: petroleum ether/ethyl acetate (20:1). Yield 2.55 mmol (85%), light yellow solid.  $^1\text{H}$  NMR ( $\text{CDCl}_3$ , 400 MHz)  $\delta$  7.32 (dd,  $J = 7.6\text{Hz}$ ,  $J = 1.2\text{Hz}$ , 1H), 7.28-7.24 (m, 4H), 7.16-7.12 (m, 1H), 6.95-6.91 (m, 2H), 3.82 (s, 3H), 3.35 (s, 3H).  $^{13}\text{C}$  NMR ( $\text{CDCl}_3$ , 100 MHz)  $\delta$  159.1, 154.1, 136.4, 135.7, 134.2, 130.7, 129.2, 128.5, 126.3, 120.8, 114.5, 86.9, 86.9, 55.5, 36.7. IR (neat,  $\text{cm}^{-1}$ ): 3443, 3065, 2933, 2838,

2367, 2217, 1931, 1883, 1638, 1562, 1511, 1431, 1295, 1249, 1124, 1031, 912, 836, 731, 671, 592, 529, 457.

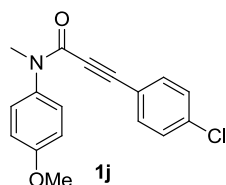

**3-(4-chlorophenyl)-N-(4-methoxyphenyl)-N-methylpropiolamide 1j.** Eluent: petroleum ether/ethyl acetate (20:1). Yield 2.08 mmol (70%), light yellow solid.  $^1\text{H}$  NMR ( $\text{CDCl}_3$ , 400 MHz)  $\delta$  7.28-7.21 (m, 4H), 7.09 (d,  $J = 8.8\text{Hz}$ , 2H), 6.95 (d,  $J = 8.8\text{Hz}$ , 2H), 3.85 (s, 3H), 3.34 (s, 3H).  $^{13}\text{C}$  NMR ( $\text{CDCl}_3$ , 100 MHz)  $\delta$  159.1, 154.2, 136.1, 135.9, 133.5, 128.7, 128.5, 119.0, 114.2, 89.5, 83.4, 55.5, 36.5. IR (neat,  $\text{cm}^{-1}$ ): 3449, 3056, 2932, 2543, 2217, 1904, 1742, 1638, 1442, 1376, 1249, 1123, 1031, 912, 833, 784, 642, 592, 466.

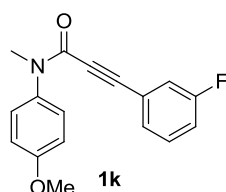

**3-(3-fluorophenyl)-N-(4-methoxyphenyl)-N-methylpropiolamide 1k.** Eluent: petroleum ether/ethyl acetate (20:1). Yield 2.59 mmol (87%), light yellow solid.  $^1\text{H}$  NMR ( $\text{CDCl}_3$ , 400 MHz)  $\delta$  7.28-7.27 (m, 2H), 7.25-7.19 (m, 1H), 7.06-7.03 (m, 1H), 7.01-6.93 (m, 3H), 6.86-6.82 (m, 1H), 3.85 (s, 3H), 3.35 (s, 3H).  $^{13}\text{C}$  NMR ( $\text{CDCl}_3$ , 100 MHz)  $\delta$  163.2, 160.8, 159.2, 154.2, 135.9, 130.0, 129.9, 128.5, 128.2, 128.2, 126.7, 122.4, 122.3, 119.1, 118.9, 117.3, 117.1, 114.3, 89.2, 89.2, 83.2, 55.5, 36.5. IR (neat,  $\text{cm}^{-1}$ ): 3438, 3069, 2839, 2432, 2214, 1883, 1636, 1581, 1511, 1431, 1373, 1269, 1173, 1119, 1031, 911, 837, 730, 651, 544, 462.

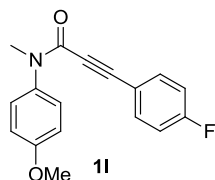

**3-(4-fluorophenyl)-N-(4-methoxyphenyl)-N-methylpropiolamide 1l.** Eluent: petroleum ether/ethyl acetate (20:1). Yield 2.76 mmol (92%), light yellow solid.  $^1\text{H}$  NMR ( $\text{CDCl}_3$ , 400 MHz)  $\delta$  7.29-7.23 (m, 2H), 7.18-7.11 (m, 2H), 6.97-6.91 (m, 4H), 3.85 (s, 3H), 3.34 (s, 3H).  $^{13}\text{C}$  NMR ( $\text{CDCl}_3$ , 100 MHz)  $\delta$  164.5, 162.0, 159.0, 154.3, 136.0, 134.5, 134.4, 128.5, 126.6, 116.6, 116.5, 115.8, 115.6, 114.4, 114.2, 89.7, 82.4, 55.5, 36.4. IR (neat,  $\text{cm}^{-1}$ ): 3470, 3068, 2839, 2438, 2217, 1894, 1635, 1511, 1416, 1375, 1294, 1173, 1054, 912, 801, 645, 533, 451.

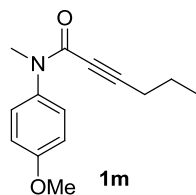

**N-(4-methoxyphenyl)-N-methylhex-2-ynamide 1m.** Eluent: petroleum ether/ethyl acetate (20:1). Yield 1.82 mmol (61%), light yellow liquid.  $^1\text{H}$  NMR ( $\text{CDCl}_3$ , 400 MHz)  $\delta$  7.19-7.16 (m, 2H), 6.90 (d,  $J = 8.8\text{Hz}$ , 2H), 3.83 (s, 3H), 3.28 (s, 3H), 2.08 (t,  $J = 7.2\text{Hz}$ , 2H), 1.35-1.26 (m, 2H), 0.73

(t,  $J = 7.6\text{Hz}$ , 3H).  $^{13}\text{C}$  NMR ( $\text{CDCl}_3$ , 100 MHz)  $\delta$  158.9, 154.7, 136.4, 128.4, 114.2, 93.8, 55.5, 36.4, 21.0, 20.7, 13.0. IR (neat,  $\text{cm}^{-1}$ ): 3432, 3043, 2874, 2544, 2226, 1882, 1636, 1512, 1427, 1292, 1168, 1106, 916, 837, 733, 647, 566, 494.

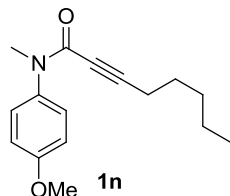

***N*-(4-methoxyphenyl)-*N*-methyloct-2-ynamide 1n.** Eluent: petroleum ether/ethyl acetate (20:1). Yield 2.10 mmol (70%), light yellow liquid.  $^1\text{H}$  NMR ( $\text{CDCl}_3$ , 400 MHz)  $\delta$  7.18 (dd,  $J = 6.8\text{Hz}$ ,  $J = 2.0\text{Hz}$ , 2H), 6.90 (d,  $J = 8.8\text{Hz}$ , 2H), 3.82 (s, 3H), 3.27 (s, 3H), 2.10 (t,  $J = 6.8\text{Hz}$ , 2H), 1.30-1.23 (m, 2H), 1.20-1.12 (m, 2H), 1.09-1.03 (m, 2H), 0.82 (t,  $J = 7.2\text{Hz}$ , 3H).  $^{13}\text{C}$  NMR ( $\text{CDCl}_3$ , 100 MHz)  $\delta$  158.8, 154.7, 136.3, 128.4, 114.1, 94.0, 75.0, 55.4, 36.5, 30.5, 27.1, 22.0, 18.7, 13.7. IR (neat,  $\text{cm}^{-1}$ ): 3410, 2957, 2860, 2226, 1881, 1638, 1512, 1427, 1291, 1248, 1107, 1034, 915, 796, 647, 570, 540.

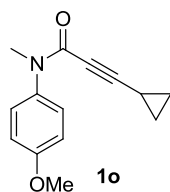

**3-cyclopropyl-*N*-(4-methoxyphenyl)-*N*-methylpropiolamide 1o.** Eluent: petroleum ether/ethyl acetate (20:1). Yield 2.19 mmol (73%), light yellow liquid.  $^1\text{H}$  NMR ( $\text{CDCl}_3$ , 400 MHz)  $\delta$  7.16 (d,  $J = 8.8\text{Hz}$ , 2H), 6.90 (d,  $J = 8.8\text{Hz}$ , 2H), 3.84 (s, 3H), 3.26 (s, 3H), 1.15-1.08 (m, 1H), 0.75-0.70 (m, 2H), 0.50-0.46 (m, 2H).  $^{13}\text{C}$  NMR ( $\text{CDCl}_3$ , 100 MHz)  $\delta$  158.8, 154.6, 136.3, 128.4, 114.1, 97.5, 70.1, 55.5, 36.3, 8.8, -0.6. IR (neat,  $\text{cm}^{-1}$ ): 3410, 2956, 2853, 2483, 2222, 1882, 1743, 1635, 1511, 1427, 1290, 1166, 1112, 1031, 890, 815, 731, 644, 539.

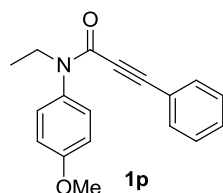

***N*-ethyl-*N*-(4-methoxyphenyl)-3-phenylpropiolamide 1p.** Eluent: petroleum ether/ethyl acetate (20:1). Yield 2.04 mmol (68%), light yellow solid.  $^1\text{H}$  NMR ( $\text{CDCl}_3$ , 400 MHz)  $\delta$  7.32-7.29 (m, 1H), 7.27-7.21 (m, 4H), 7.15-7.13 (m, 2H), 6.96-6.94 (m, 2H), 3.85-3.80 (m, 5H), 1.17 (t,  $J = 7.2\text{Hz}$ , 3H).  $^{13}\text{C}$  NMR ( $\text{CDCl}_3$ , 100 MHz)  $\delta$  159.2, 154.2, 134.4, 132.4, 129.7, 128.5, 128.2, 120.6, 114.2, 90.7, 82.9, 55.5, 43.5, 12.8. IR (neat,  $\text{cm}^{-1}$ ): 3442, 3058, 2934, 2838, 2486, 2215, 1957, 1813, 1742, 1633, 1462, 1397, 1313, 1172, 1107, 1031, 913, 806, 732, 671, 582, 536.

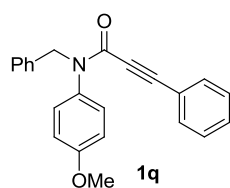

***N*-benzyl-*N*-(4-methoxyphenyl)-3-phenylpropiolamide 1q.** Eluent: petroleum ether/ethyl acetate (20:1). Yield 2.49 mmol (83%), light yellow solid.  $^1\text{H}$  NMR ( $\text{CDCl}_3$ , 400 MHz)  $\delta$

7.30-7.19 (m, 8H), 7.13 (dd,  $J = 8.0\text{Hz}$ ,  $J = 1.2\text{Hz}$ , 2H), 7.04 (dd,  $J = 6.8\text{Hz}$ ,  $J = 2.0\text{Hz}$ , 2H), 4.95 (s, 2H), 3.78 (s, 3H).  $^{13}\text{C}$  NMR ( $\text{CDCl}_3$ , 100 MHz)  $\delta$  159.1, 154.6, 136.7, 134.3, 132.3, 129.8, 129.7, 128.7, 128.4, 128.2, 127.5, 120.4, 114.0, 91.4, 82.6, 55.4, 52.3. IR (neat,  $\text{cm}^{-1}$ ): 3257, 3004, 2931, 2592, 2218, 1957, 1742, 1635, 1492, 1391, 1297, 1203, 1108, 1030, 913, 836, 730, 631, 535, 467.

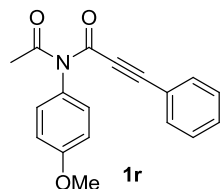

***N*-acetyl-*N*-(4-methoxyphenyl)-3-phenylpropiolamide 1r.** Eluent: petroleum ether/ethyl acetate (20:1). Yield 2.28 mmol (76%), light yellow solid.  $^1\text{H}$  NMR ( $\text{CDCl}_3$ , 400 MHz)  $\delta$  7.38 (t,  $J = 7.6\text{Hz}$ , 1H), 7.28 (t,  $J = 7.6\text{Hz}$ , 2H), 7.20-7.15 (m, 4H), 7.00 (dd,  $J = 6.8\text{Hz}$ ,  $J = 2.0\text{Hz}$ , 2H), 3.86 (s, 3H), 2.63 (s, 3H).  $^{13}\text{C}$  NMR ( $\text{CDCl}_3$ , 100 MHz)  $\delta$  172.6, 160.0, 155.0, 133.0, 131.0, 130.8, 130.6, 128.5, 119.6, 114.6, 96.2, 82.9, 55.6, 27.3. IR (neat,  $\text{cm}^{-1}$ ): 3322, 3057, 2925, 2545, 2404, 2205, 1898, 1711, 1606, 1549, 1489, 1416, 1261, 1170, 1040, 912, 761, 690, 581, 537.

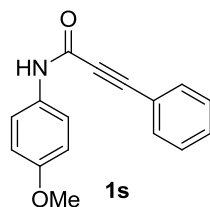

***N*-(4-methoxyphenyl)-3-phenylpropiolamide 1s.** Eluent: petroleum ether/ethyl acetate (20:1). Yield 2.88 mmol (96%), light yellow solid.  $^1\text{H}$  NMR ( $\text{CDCl}_3$ , 400 MHz)  $\delta$  7.92 (s, 1H), 7.53-7.47 (m, 4H), 7.42-7.40 (m, 1H), 7.39-7.31 (m, 2H), 6.85 (d,  $J = 8.8\text{Hz}$ , 2H), 3.77 (s, 3H).  $^{13}\text{C}$  NMR ( $\text{CDCl}_3$ , 100 MHz)  $\delta$  156.8, 151.0, 132.5, 130.5, 130.1, 128.5, 121.8, 120.1, 114.2, 85.6, 83.5, 55.4. IR (neat,  $\text{cm}^{-1}$ ): 3280, 3130, 2997, 2838, 2591, 2371, 2209, 1969, 1880, 1774, 1605, 1509, 1411, 1306, 1180, 1116, 961, 830, 724, 605, 520.

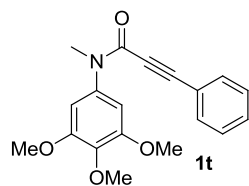

***N*-methyl-3-phenyl-*N*-(3,4,5-trimethoxyphenyl)propiolamide 1t.** Eluent: petroleum ether/ethyl acetate (20:1). Yield 2.14 mmol (71%), light yellow solid.  $^1\text{H}$  NMR ( $\text{CDCl}_3$ , 400 MHz)  $\delta$  7.34 (t,  $J = 7.6\text{Hz}$ , 1H), 7.30-7.24 (m, 2H), 7.19 (d,  $J = 7.2\text{Hz}$ , 2H), 6.60 (s, 2H), 3.89 (s, 3H), 3.86 (s, 6H), 3.38 (s, 3H).  $^{13}\text{C}$  NMR ( $\text{CDCl}_3$ , 100 MHz)  $\delta$  154.2, 153.3, 138.8, 137.7, 132.3, 129.9, 128.3, 120.3, 104.9, 90.7, 82.5, 60.8, 56.2, 36.3. IR (neat,  $\text{cm}^{-1}$ ): 3272, 2939, 2842, 2218, 1956, 1640, 1504, 1418, 1345, 1234, 1128, 1006, 917, 835, 731, 691, 612, 532, 476.

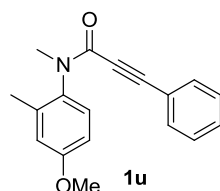

***N*-(4-methoxy-2-methylphenyl)-*N*-methyl-3-phenylpropiolamide 1u.** Eluent: petroleum

ether/ethyl acetate (20:1). Yield 2.54 mmol (85%), light yellow liquid.  $^1\text{H}$  NMR ( $\text{CDCl}_3$ , 400 MHz)  $\delta$  7.33-7.27 (m, 1H), 7.22 (t,  $J = 7.6\text{Hz}$ , 2H), 7.16 (d,  $J = 8.4\text{Hz}$ , 1H), 7.12-7.10 (m, 2H), 6.84-6.78 (m, 2H), 3.83 (s, 3H), 3.27 (s, 3H), 2.28 (s, 3H).  $^{13}\text{C}$  NMR ( $\text{CDCl}_3$ , 100 MHz)  $\delta$  159.3, 155.0, 137.5, 134.9, 132.4, 129.7, 129.5, 128.2, 120.4, 115.9, 112.0, 89.9, 82.4, 55.4, 35.5, 17.7. IR (neat,  $\text{cm}^{-1}$ ): 3265, 3001, 2928, 2839, 2568, 2218, 1889, 1741, 1640, 1465, 1375, 1295, 1162, 1106, 1037, 942, 850, 732, 650, 589, 533, 466.

### Typical procedure for the preparation of product 3a

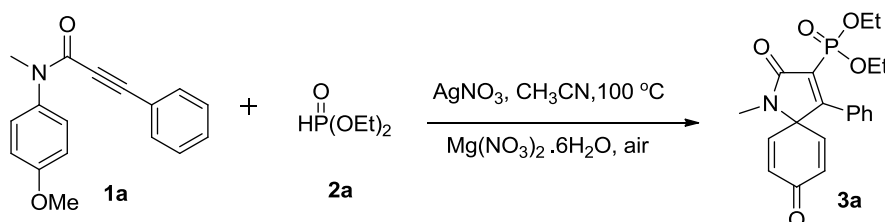

0.4 mmol diethyl phosphate **2a** in 1 mL  $\text{CH}_3\text{CN}$  was added into the Schlenk-tube charged with 0.2 mmol **1a**, 10 mol%  $\text{AgNO}_3$ , 0.1 mmol  $\text{Mg}(\text{NO}_3)_2 \cdot 6\text{H}_2\text{O}$ . The mixture was stirred at 100 °C for 5 h, then cooled down to room temperature. The resulting solution was directly filtered through a pad of silica gel using a sintered glass funnel, and concentrated under reduced pressure. The residue was purified by chromatography on silica gel (elute: EtOAc/Petroleum ether 1/1 - 5/1, v/v) to give the desired product **3a** (83%).

### Characterization Data of 3a-3r and 3t-3u

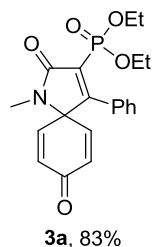

**diethyl (1-methyl-2,8-dioxo-4-phenyl-1-azaspiro[4.5]deca-3,6,9-trien-3-yl)phosphonate 3a.** Eluent: ethyl acetate/ petroleum ether (3:1). white solid, mp 129-131 °C.  $^1\text{H}$  NMR ( $\text{CDCl}_3$ , 400 MHz)  $\delta$  7.40-7.37 (m, 1H), 7.34-7.30 (m, 2H), 7.22 (d,  $J = 7.2\text{Hz}$ , 2H), 6.53 (d,  $J = 10.4\text{Hz}$ , 2H), 6.45 (d,  $J = 10.4\text{Hz}$ , 2H), 4.13-3.98 (m, 4H), 2.88 (s, 3H), 1.11 (t,  $J = 7.2\text{Hz}$ , 6H).  $^{13}\text{C}$  NMR ( $\text{CDCl}_3$ , 100 MHz)  $\delta$  183.4, 167.8, 167.6, 165.4, 165.4, 143.5, 133.6, 130.8, 130.8, 129.8, 127.9, 127.8, 26.0, 16.0, 15.9.  $^{31}\text{P}$  NMR (162 MHz,  $\text{CDCl}_3$ ):  $\delta$  7.5. IR (neat,  $\text{cm}^{-1}$ ): 3453, 3053, 2931, 2366, 2243, 1964, 1699, 1631, 1475, 1420, 1248, 1168, 1042, 921, 820, 731, 647, 572, 428. HRMS (ESI) Calcd for  $\text{C}_{20}\text{H}_{22}\text{N}_1\text{O}_5\text{P}_1$ :  $[\text{M}+\text{Na}]^+ = 410.1122$  Found:410.1128.

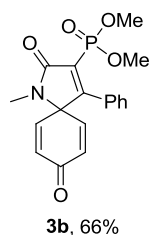

**dimethyl (1-methyl-2,8-dioxo-4-phenyl-1-azaspiro[4.5]deca-3,6,9-trien-3-yl)phosphonate 3b.**



Eluent: ethyl acetate/ petroleum ether (3:1). Light yellow solid, mp 142-144°C. <sup>1</sup>H NMR (CDCl<sub>3</sub>, 400 MHz) δ 7.42-7.31 (m, 3H), 7.23-7.21 (m, 2H), 6.53 (d, *J* = 10.0Hz, 2H), 6.45 (d, *J* = 10.0Hz, 2H), 3.65 (s, 3H), 3.62 (s, 3H), 2.89 (s, 3H). <sup>13</sup>C NMR (CDCl<sub>3</sub>, 100 MHz) δ 183.3, 167.7, 167.5, 166.1, 166.0, 143.3, 133.7, 130.5, 130.5, 130.0, 129.2, 127.9, 127.8, 127.8, 127.1, 69.4, 69.3, 53.2, 53.2, 26.0. <sup>31</sup>P NMR (162 MHz, CDCl<sub>3</sub>): δ 10.2. IR (neat, cm<sup>-1</sup>): 3456, 3052, 2853, 2548, 2245, 1890, 1669, 1595, 1444, 1369, 1251, 1180, 1043, 917, 824, 731, 647, 569, 423. HRMS (ESI) Calcd for C<sub>18</sub>H<sub>18</sub>N<sub>1</sub>O<sub>5</sub>P<sub>1</sub>: [M+Na]<sup>+</sup> = 382.0810 Found: 382.0815.

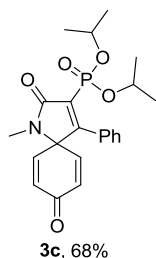

**diisopropyl (1-methyl-2,8-dioxo-4-phenyl-1-azaspiro[4.5]deca-3,6,9-trien-3-yl)phosphonate**

**3c.** Eluent: ethyl acetate/ petroleum ether (3:1). Light yellow solid, mp 106-108°C. <sup>1</sup>H NMR (CDCl<sub>3</sub>, 400 MHz) δ 7.38-7.34 (m, 1H), 7.32-7.28 (m, 2H), 7.20-7.18 (m, 2H), 6.52-6.49 (m, 2H), 6.44-6.41 (m, 2H), 4.83-4.75 (m, 2H), 2.88 (s, 3H), 1.22 (d, *J* = 6.4Hz, 6H), 1.09 (d, *J* = 6.4Hz, 6H). <sup>13</sup>C NMR (CDCl<sub>3</sub>, 100 MHz) δ 183.5, 167.8, 167.6, 164.8, 164.8, 143.8, 133.5, 131.2, 131.2, 130.4, 129.6, 128.3, 128.0, 128.0, 127.7, 71.9, 71.9, 69.2, 69.1, 26.0, 24.0, 24.0, 23.4, 23.3. <sup>31</sup>P NMR (162 MHz, CDCl<sub>3</sub>): δ 5.2. IR (neat, cm<sup>-1</sup>): 3383, 2979, 2372, 2240, 1960, 1702, 1607, 1511, 1420, 1373, 1247, 1142, 1023, 874, 788, 732, 647, 575, 492. HRMS (ESI) Calcd for C<sub>22</sub>H<sub>25</sub>N<sub>1</sub>O<sub>5</sub>P<sub>1</sub>: [M+Na]<sup>+</sup> = 438.1429 Found: 438.1441.

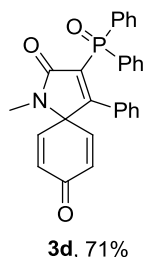

**3-(diphenylphosphoryl)-1-methyl-4-phenyl-1-azaspiro[4.5]deca-3,6,9-triene-2,8-dione** **3d.**

Eluent: ethyl acetate/ petroleum ether (3:1). Light yellow solid, mp 83-85°C. <sup>1</sup>H NMR (CDCl<sub>3</sub>, 400 MHz) δ 7.80-7.75 (m, 4H), 7.50-7.46 (m, 2H), 7.42-7.37 (m, 4H), 7.24 (dd, *J* = 14.4Hz, *J* = 7.6Hz, 1H), 7.14 (t, *J* = 8.4Hz, 2H), 7.08 (d, *J* = 7.6Hz, 2H), 6.52 (d, *J* = 10.0Hz, 2H), 6.43 (d, *J* = 10.0Hz, 2H), 2.83 (s, 3H). <sup>13</sup>C NMR (CDCl<sub>3</sub>, 100 MHz) δ 183.4, 168.8, 168.7, 168.2, 168.1, 143.7, 133.7, 132.0, 132.0, 132.0, 131.6, 131.5, 131.0, 129.8, 128.4, 128.2, 128.1, 127.6, 69.6, 69.5, 26.1. <sup>31</sup>P NMR (162 MHz, CDCl<sub>3</sub>): δ 18.3. IR (neat, cm<sup>-1</sup>): 3656, 3390, 3058, 2928, 2591, 2248, 1971, 1811, 1669, 1590, 1487, 1370, 1270, 1195, 1119, 1042, 999, 913, 843, 784, 729, 646, 547, 489, 433. HRMS (ESI) Calcd for C<sub>28</sub>H<sub>22</sub>N<sub>1</sub>O<sub>3</sub>P<sub>1</sub>: [M+Na]<sup>+</sup> = 474.1223 Found: 474.1230.

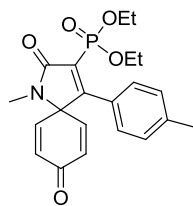

**3e**, 69%

**diethyl (1-methyl-2,8-dioxo-4-(p-tolyl)-1-azaspiro[4.5]deca-3,6,9-trien-3-yl)phosphonate 3e.**

Eluent: ethyl acetate/ petroleum ether (3:1). Light yellow liquide.  $^1\text{H}$  NMR ( $\text{CDCl}_3$ , 400 MHz)  $\delta$  7.13 (s, 4H), 6.51 (d,  $J = 10.0\text{Hz}$ , 2H), 6.45 (dd,  $J = 10.8\text{Hz}$ ,  $J = 2.0\text{Hz}$ , 2H), 4.14-4.02 (m, 4H), 2.87 (s, 3H), 2.33 (s, 3H), 1.13 (t,  $J = 7.2\text{Hz}$ , 6H).  $^{13}\text{C}$  NMR ( $\text{CDCl}_3$ , 100 MHz)  $\delta$  183.6, 167.9, 167.7, 166.0, 165.9, 143.7, 140.2, 133.5, 129.0, 128.6, 127.9, 127.9, 127.0, 69.3, 69.2, 26.0, 21.2, 16.0, 15.9.  $^{31}\text{P}$  NMR (162 MHz,  $\text{CDCl}_3$ ):  $\delta$  7.7. IR (neat,  $\text{cm}^{-1}$ ): 3387, 3043, 2929, 2243, 1698, 1630, 1510, 1419, 1368, 1249, 1169, 1030, 920, 834, 733, 646, 572, 506, 425. HRMS (ESI) Calcd for  $\text{C}_{21}\text{H}_{24}\text{N}_1\text{O}_5\text{P}_1$ :  $[\text{M}+\text{Na}]^+ = 424.1274$  Found: 424.1284.

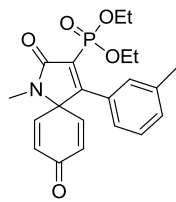

**3f**, 72%

**diethyl (1-methyl-2,8-dioxo-4-(m-tolyl)-1-azaspiro[4.5]deca-3,6,9-trien-3-yl)phosphonate 3f.**

Eluent: ethyl acetate/ petroleum ether (3:1). Light yellow solid, mp 92-94°C.  $^1\text{H}$  NMR ( $\text{CDCl}_3$ , 400 MHz)  $\delta$  7.22-7.17 (m, 2H), 7.02-6.99 (m, 2H), 6.51 (d,  $J = 10.4\text{Hz}$ , 2H), 6.44 (d,  $J = 10.4\text{Hz}$ , 2H), 4.13-4.01 (m, 4H), 2.88 (s, 3H), 2.32 (s, 3H), 1.11 (t,  $J = 6.8\text{Hz}$ , 6H).  $^{13}\text{C}$  NMR ( $\text{CDCl}_3$ , 100 MHz)  $\delta$  183.5, 167.9, 167.7, 165.7, 165.7, 143.6, 137.5, 133.5, 130.8, 130.8, 130.6, 129.4, 128.5, 127.8, 127.4, 124.8, 69.3, 69.2, 62.9, 62.8, 26.0, 21.2, 16.0, 15.9.  $^{31}\text{P}$  NMR (162 MHz,  $\text{CDCl}_3$ ):  $\delta$  7.6. IR (neat,  $\text{cm}^{-1}$ ): 3402, 2982, 2367, 1964, 1699, 1631, 1512, 1420, 1369, 1205, 1098, 1044, 918, 824, 733, 623, 573, 470. HRMS (ESI) Calcd for  $\text{C}_{21}\text{H}_{24}\text{N}_1\text{O}_5\text{P}_1$ :  $[\text{M}+\text{Na}]^+ = 424.1274$  Found: 424.1284.

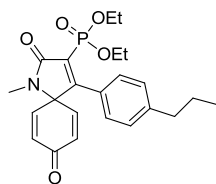

**3g**, 72%

**Diethyl**

**(1-methyl-2,8-dioxo-4-(4-propylphenyl)-1-azaspiro[4.5]deca-3,6,9-trien-3-yl)phosphonate 3g.**

Eluent: ethyl acetate/ petroleum ether (3:1). Light yellow liquide.  $^1\text{H}$  NMR ( $\text{CDCl}_3$ , 400 MHz)  $\delta$  7.14 (dd,  $J = 15.6\text{Hz}$ ,  $J = 8.0\text{Hz}$ , 4H), 6.52 (d,  $J = 10.0\text{Hz}$ , 2H), 6.45 (d,  $J = 10.0\text{Hz}$ , 2H), 4.13-3.99 (m, 4H), 2.87 (s, 3H), 2.57 (t,  $J = 7.6\text{Hz}$ , 2H), 1.65-1.56 (m, 2H), 1.11 (t,  $J = 7.2\text{Hz}$ , 6H), 0.91 (t,  $J = 7.2\text{Hz}$ , 3H).  $^{13}\text{C}$  NMR ( $\text{CDCl}_3$ , 100 MHz)  $\delta$  183.6, 168.0, 167.8, 165.9, 165.8, 145.0, 143.8, 133.6, 129.1, 128.3, 128.2, 128.0, 127.9, 127.9, 127.1, 69.4, 69.2, 63.0, 62.9, 37.7, 26.0, 24.2, 16.1, 16.0, 13.7.  $^{31}\text{P}$  NMR (162 MHz,  $\text{CDCl}_3$ ):  $\delta$  7.8. IR (neat,  $\text{cm}^{-1}$ ): 3387, 2964, 2870, 2242, 1700, 1630, 1510, 1419, 1368, 1248, 1099, 1030, 877, 805, 646, 526, 470. HRMS (ESI)

Calcd for C<sub>23</sub>H<sub>28</sub>N<sub>1</sub>O<sub>5</sub>P<sub>1</sub>: [M+Na]<sup>+</sup> = 452.1584 Found: 452.1597.

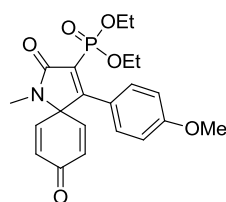

3h, 72%

#### diethyl

#### (4-(4-methoxyphenyl)-1-methyl-2,8-dioxo-1-azaspiro[4.5]deca-3,6,9-trien-3-yl)phosphonate

**3h.** Eluent: ethyl acetate/ petroleum ether (3:1). Light yellow liquide. <sup>1</sup>H NMR (CDCl<sub>3</sub>, 400 MHz) δ 7.26 (d, *J* = 8.8Hz, 2H), 6.85-6.83 (m, 2H), 6.49 (dd, *J* = 19.6Hz, *J* = 10.4Hz, 4H), 4.13-4.06 (m, 4H), 3.80 (s, 3H), 2.86 (s, 3H), 1.16 (t, *J* = 7.2Hz, 6H). <sup>13</sup>C NMR (CDCl<sub>3</sub>, 100 MHz) δ 183.6, 168.0, 167.8, 165.6, 165.5, 161.1, 144.0, 133.4, 129.6, 129.6, 128.2, 126.2, 123.1, 123.0, 113.4, 69.1, 69.0, 62.9, 62.9, 55.2, 25.9, 16.1, 16.0. <sup>31</sup>P NMR (162 MHz, CDCl<sub>3</sub>): δ 8.0. IR (neat, cm<sup>-1</sup>): 3389, 2980, 2846, 2371, 2030, 1696, 1630, 1510, 1444, 1385, 1250, 1042, 919, 841, 763, 733, 572, 468. HRMS (ESI) Calcd for C<sub>21</sub>H<sub>24</sub>N<sub>1</sub>O<sub>6</sub>P<sub>1</sub>: [M+Na]<sup>+</sup> = 440.125 Found:440.1233.

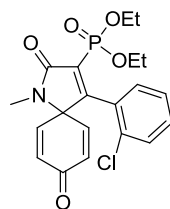

3i, 77%

#### diethyl

#### (4-(2-chlorophenyl)-1-methyl-2,8-dioxo-1-azaspiro[4.5]deca-3,6,9-trien-3-yl)phosphonate 3i.

Eluent: ethyl acetate/ petroleum ether (3:1). Light yellow liquid. <sup>1</sup>H NMR (CDCl<sub>3</sub>, 400 MHz) δ 7.39 (dd, *J* = 8.0Hz, *J* = 1.2Hz, 1H), 7.33-7.28 (m, 1H), 7.24-7.19 (m, 1H), 6.98 (dd, *J* = 7.6Hz, *J* = 1.6Hz, 1H), 6.77 (dd, *J* = 10.0Hz, *J* = 2.8Hz, 1H), 6.55 (dd, *J* = 10.0Hz, *J* = 2.8Hz, 1H), 6.48 (dd, *J* = 10.0Hz, *J* = 1.6Hz, 1H), 6.34 (dd, *J* = 10.0Hz, *J* = 1.6Hz, 1H), 4.20-4.07 (m, 4H), 2.92 (s, 3H), 1.21 (t, *J* = 7.2Hz, 3H), 1.08 (t, *J* = 7.2Hz, 3H). <sup>13</sup>C NMR (CDCl<sub>3</sub>, 100 MHz) δ 183.3, 167.4, 167.2, 161.9, 161.8, 143.5, 143.1, 134.1, 133.0, 132.7, 132.7, 132.7, 130.7, 130.6, 129.6, 129.5, 129.5, 129.5, 129.5, 125.8, 70.6, 70.4, 63.0, 63.0, 62.7, 62.6, 26.3, 16.1, 16.1, 16.0, 15.9. <sup>31</sup>P NMR (162 MHz, CDCl<sub>3</sub>): δ 6.1. IR (neat, cm<sup>-1</sup>): 3396, 3058, 2928, 2370, 2243, 1705, 1632, 1589, 1512, 1472, 1369, 1246, 1169, 1043, 918, 818, 733, 645, 572, 454. HRMS (ESI) Calcd for C<sub>20</sub>H<sub>21</sub>Cl<sub>1</sub>N<sub>1</sub>O<sub>5</sub>P<sub>1</sub>: [M+Na]<sup>+</sup> = 444.0731 Found: 444.0738.

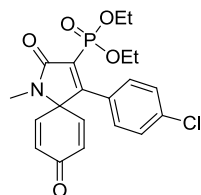

3j, 75%

#### diethyl

#### (4-(4-chlorophenyl)-1-methyl-2,8-dioxo-1-azaspiro[4.5]deca-3,6,9-trien-3-yl)phosphonate 3j.

Eluent: ethyl acetate/ petroleum ether (3:1). Light yellow solid, mp 97-99°C. <sup>1</sup>H NMR (CDCl<sub>3</sub>, 400 MHz) δ 7.33-7.30 (m, 2H), 7.18 (d, *J* = 8.4Hz, 2H), 6.48 (dd, *J* = 17.6Hz, *J* = 10.4Hz, 4H),

4.13-4.06 (m, 4H), 2.88 (s, 3H), 1.16 (t,  $J = 7.2\text{Hz}$ , 6H).  $^{13}\text{C}$  NMR ( $\text{CDCl}_3$ , 100 MHz)  $\delta$  183.2, 167.5, 167.4, 164.2, 164.1, 143.3, 136.3, 133.8, 130.3, 129.4, 129.4, 129.3, 129.2, 128.2, 69.2, 69.1, 63.0, 63.0, 26.0, 16.1, 16.0.  $^{31}\text{P}$  NMR (162 MHz,  $\text{CDCl}_3$ ):  $\delta$  7.1. IR (neat,  $\text{cm}^{-1}$ ): 3428, 2982, 2345, 2245, 1853, 1670, 1607, 1511, 1420, 1368, 1248, 1093, 916, 804, 647, 572, 507. HRMS (ESI) Calcd for  $\text{C}_{20}\text{H}_{21}\text{Cl}_1\text{N}_1\text{O}_5\text{P}_1$ :  $[\text{M}+\text{Na}]^+ = 444.0731$  Found: 444.0738.

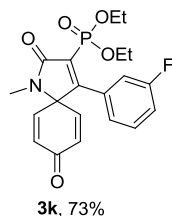

**3k**, 73%

### diethyl

#### (4-(3-fluorophenyl)-1-methyl-2,8-dioxo-1-azaspiro[4.5]deca-3,6,9-trien-3-yl)phosphonate **3k**.

Eluent: ethyl acetate/ petroleum ether (3:1). Light yellow liquide.  $^1\text{H}$  NMR ( $\text{CDCl}_3$ , 400 MHz)  $\delta$  7.34-7.29 (m, 1H), 7.10 (dd,  $J = 8.4\text{Hz}$ ,  $J = 2.4\text{Hz}$ , 1H), 7.08-6.99 (m, 1H), 6.94 (dd,  $J = 9.2\text{Hz}$ ,  $J = 2.0\text{Hz}$ , 1H), 6.49 (dd,  $J = 21.6\text{Hz}$ ,  $J = 10.4\text{Hz}$ , 4H), 4.16-4.04 (m, 4H), 2.89 (s, 3H), 1.15 (t,  $J = 7.2\text{Hz}$ , 6H).  $^{13}\text{C}$  NMR ( $\text{CDCl}_3$ , 100 MHz)  $\delta$  183.2, 167.4, 167.3, 163.7, 163.6, 163.0, 160.5, 143.1, 133.8, 132.8, 132.7, 132.7, 130.5, 129.7, 129.6, 128.5, 123.9, 123.9, 116.9, 116.7, 115.4, 115.2, 69.3, 69.1, 63.0, 62.9, 29.6, 26.0, 16.0, 15.9.  $^{31}\text{P}$  NMR (162 MHz,  $\text{CDCl}_3$ ):  $\delta$  6.9. IR (neat,  $\text{cm}^{-1}$ ): 3374, 2980, 2859, 2367, 1968, 1853, 1697, 1628, 1584, 1482, 1385, 1262, 1165, 1026, 914, 786, 693, 547. HRMS (ESI) Calcd for  $\text{C}_{20}\text{H}_{21}\text{F}_1\text{N}_1\text{O}_5\text{P}_1$ :  $[\text{M}+\text{Na}]^+ = 428.1023$  Found: 428.1034.

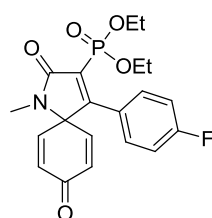

**3l**, 75%

### diethyl

#### (4-(4-fluorophenyl)-1-methyl-2,8-dioxo-1-azaspiro[4.5]deca-3,6,9-trien-3-yl)phosphonate **3l**.

Eluent: ethyl acetate/ petroleum ether (3:1). Light yellow liquide.  $^1\text{H}$  NMR ( $\text{CDCl}_3$ , 400 MHz)  $\delta$  7.27-7.23 (m, 2H), 7.04 (t,  $J = 8.4\text{Hz}$ , 2H), 6.49 (dd,  $J = 20.8\text{Hz}$ ,  $J = 10.4\text{Hz}$ , 4H), 4.16-4.04 (m, 4H), 2.88 (s, 3H), 1.16 (t,  $J = 6.8\text{Hz}$ , 6H).  $^{13}\text{C}$  NMR ( $\text{CDCl}_3$ , 100 MHz)  $\delta$  183.3, 167.6, 167.4, 164.8, 164.4, 164.3, 162.3, 143.4, 133.8, 130.8, 130.1, 130.1, 130.1, 128.7, 128.0, 126.9, 126.8, 126.8, 115.3, 115.1, 69.3, 69.1, 63.0, 62.9, 29.6, 26.0, 16.1, 16.0.  $^{31}\text{P}$  NMR (162 MHz,  $\text{CDCl}_3$ ):  $\delta$  7.3. IR (neat,  $\text{cm}^{-1}$ ): 3466, 3050, 2931, 2321, 2024, 1700, 1631, 1506, 1387, 1234, 1099, 1209, 878, 796, 646, 573, 469. HRMS (ESI) Calcd for  $\text{C}_{20}\text{H}_{21}\text{F}_1\text{N}_1\text{O}_5\text{P}_1$ :  $[\text{M}+\text{Na}]^+ = 428.1023$  Found: 428.1034.

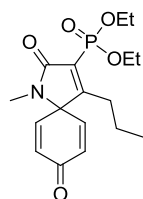

**3m**, 38%

**diethyl (1-methyl-2,8-dioxo-4-propyl-1-azaspiro[4.5]deca-3,6,9-trien-3-yl)phosphonate 3m.**

Eluent: ethyl acetate/ petroleum ether (3:1). Light yellow liquide.  $^1\text{H}$  NMR ( $\text{CDCl}_3$ , 400 MHz)  $\delta$  6.58 (d,  $J = 10.4\text{Hz}$ , 2H), 6.37 (d,  $J = 10.0\text{Hz}$ , 2H), 4.31-4.21 (m, 4H), 2.82 (s, 3H), 2.44-2.39 (m, 2H), 1.59-1.49 (m, 2H), 1.38 (t,  $J = 6.8\text{Hz}$ , 6H), 0.94 (t,  $J = 7.2\text{Hz}$ , 3H).  $^{13}\text{C}$  NMR ( $\text{CDCl}_3$ , 100 MHz)  $\delta$  183.8, 171.0, 170.9, 168.3, 168.1, 144.4, 133.6, 127.6, 125.6, 69.6, 69.5, 62.9, 62.8, 29.5, 29.5, 26.0, 24.8, 16.4, 16.3, 14.5.  $^{31}\text{P}$  NMR (162 MHz,  $\text{CDCl}_3$ ):  $\delta$  8.2. IR (neat,  $\text{cm}^{-1}$ ): 3389, 3047, 2930, 2374, 2242, 1961, 1694, 1616, 1461, 1385, 1247, 1167, 1028, 890, 809, 733, 647, 569, 419. HRMS (ESI) Calcd for  $\text{C}_{17}\text{H}_{24}\text{N}_1\text{O}_5\text{P}_1$ :  $[\text{M}+\text{Na}]^+ = 376.1279$  Found: 376.1284.

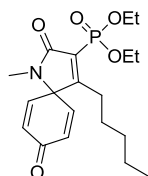

**3m**, 41%

**diethyl (1-methyl-2,8-dioxo-4-pentyl-1-azaspiro[4.5]deca-3,6,9-trien-3-yl)phosphonate 3n.**

Eluent: ethyl acetate/ petroleum ether (3:1). Light yellow liquide.  $^1\text{H}$  NMR ( $\text{CDCl}_3$ , 400 MHz)  $\delta$  6.58 (dd,  $J = 8.0\text{Hz}$ ,  $J = 2.0\text{Hz}$ , 2H), 6.38-6.36 (m, 2H), 4.31-4.21 (m, 4H), 2.82 (s, 3H), 2.45-2.41 (m, 2H), 1.54-1.51 (m, 2H), 1.50-1.46 (m, 6H), 1.40-1.26 (m, 4H), 0.85 (t,  $J = 7.2\text{Hz}$ , 3H).  $^{13}\text{C}$  NMR ( $\text{CDCl}_3$ , 100 MHz)  $\delta$  183.8, 171.4, 171.2, 168.3, 168.1, 144.5, 133.6, 127.4, 125.4, 69.7, 69.5, 62.9, 62.8, 32.1, 31.0, 27.6, 27.6, 26.1, 22.1, 16.4, 16.3, 13.8.  $^{31}\text{P}$  NMR (162 MHz,  $\text{CDCl}_3$ ):  $\delta$  8.2. IR (neat,  $\text{cm}^{-1}$ ): 3392, 2959, 2866, 2371, 2242, 1848, 1670, 1612, 1546, 1459, 1368, 1259, 1166, 1029, 862, 805, 732, 624, 569, 468. HRMS (ESI) Calcd for  $\text{C}_{19}\text{H}_{28}\text{N}_1\text{O}_5\text{P}_1$ :  $[\text{M}+\text{Na}]^+ = 404.1584$  Found: 404.1597.

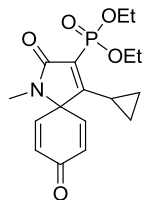

**3n**, 67%

**diethyl (4-cyclopropyl-1-methyl-2,8-dioxo-1-azaspiro[4.5]deca-3,6,9-trien-3-yl)phosphonate 3o.**

Eluent: ethyl acetate/ petroleum ether (3:1). Light yellow liquide.  $^1\text{H}$  NMR ( $\text{CDCl}_3$ , 400 MHz)  $\delta$  6.54 (d,  $J = 10.0\text{Hz}$ , 2H), 6.42 (d,  $J = 10.0\text{Hz}$ , 2H), 4.29-4.22 (m, 4H), 2.72 (s, 3H), 2.48-2.41 (m, 1H), 1.39 (t,  $J = 7.2\text{Hz}$ , 6H), 1.20-1.15 (m, 2H), 1.07-1.02 (m, 2H).  $^{13}\text{C}$  NMR ( $\text{CDCl}_3$ , 100 MHz)  $\delta$  183.7, 172.8, 172.7, 167.9, 167.8, 144.6, 132.7, 125.9, 123.9, 67.4, 67.2, 62.9, 62.8, 25.0, 16.3, 16.3, 12.6, 12.6, 10.7.  $^{31}\text{P}$  NMR (162 MHz,  $\text{CDCl}_3$ ):  $\delta$  8.9. IR (neat,  $\text{cm}^{-1}$ ): 3431, 2982, 2377, 2242, 1963, 1697, 1629, 1511, 1419, 1365, 1247, 1166, 1056, 973, 865, 811, 769, 646, 573, 426. HRMS (ESI) Calcd for  $\text{C}_{17}\text{H}_{22}\text{N}_1\text{O}_5\text{P}_1$ :  $[\text{M}+\text{Na}]^+ = 374.1120$  Found: 374.1128.

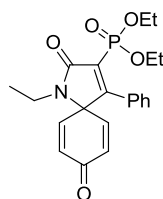

**3o**, 80%

**diethyl (1-ethyl-2,8-dioxo-4-phenyl-1-azaspiro[4.5]deca-3,6,9-trien-3-yl)phosphonate 3p.**

Eluent: ethyl acetate/ petroleum ether (3:1). Light yellow liquide.  $^1\text{H}$  NMR ( $\text{CDCl}_3$ , 400 MHz)  $\delta$  7.39-7.30 (m, 3H), 7.20 (d,  $J = 7.2\text{Hz}$ , 2H), 6.57 (d,  $J = 10.0\text{Hz}$ , 2H), 6.41 (d,  $J = 10.0\text{Hz}$ , 2H), 4.12-4.02 (m, 4H), 3.38-3.33 (m, 2H), 1.21 (t,  $J = 7.2\text{Hz}$ , 3H), 1.10 (t,  $J = 6.8\text{Hz}$ , 6H).  $^{13}\text{C}$  NMR ( $\text{CDCl}_3$ , 100 MHz)  $\delta$  183.6, 167.6, 167.6, 165.2, 165.1, 143.9, 133.1, 130.9, 130.8, 130.0, 129.7, 128.0, 127.9, 127.8, 69.7, 69.6, 62.9, 62.9, 36.1, 16.0, 15.9, 15.0.  $^{31}\text{P}$  NMR (162 MHz,  $\text{CDCl}_3$ ):  $\delta$  7.6. IR (neat,  $\text{cm}^{-1}$ ): 3384, 3053, 2932, 2373, 2244, 1962, 1697, 1630, 1511, 1443, 1391, 1320, 1248, 1166, 1052, 921, 848, 767, 699, 618, 573, 509, 456. HRMS (ESI) Calcd for  $\text{C}_{21}\text{H}_{24}\text{N}_1\text{O}_5\text{P}_1$ :  $[\text{M}+\text{Na}]^+ = 424.1277$  Found: 424.1284.

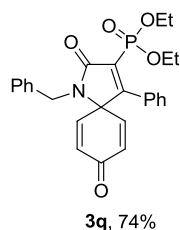

**diethyl (1-benzyl-2,8-dioxo-4-phenyl-1-azaspiro[4.5]deca-3,6,9-trien-3-yl)phosphonate 3q.**  
 Eluent: ethyl acetate/ petroleum ether (3:1). Light yellow liquide.  $^1\text{H}$  NMR ( $\text{CDCl}_3$ , 400 MHz)  $\delta$  7.34 (t,  $J = 7.2\text{Hz}$ , 1H), 7.29-7.25 (m, 7H), 7.13 (d,  $J = 8.0\text{Hz}$ , 2H), 6.32 (d,  $J = 9.6\text{Hz}$ , 2H), 6.21-6.19 (m, 2H), 4.54 (s, 2H), 4.16-3.98 (m, 4H), 1.11 (t,  $J = 7.2\text{Hz}$ , 6H).  $^{13}\text{C}$  NMR ( $\text{CDCl}_3$ , 100 MHz)  $\delta$  183.6, 167.9, 167.7, 165.6, 165.5, 143.7, 137.0, 132.7, 130.6, 130.6, 129.7, 129.6, 128.9, 128.4, 127.9, 127.9, 127.8, 127.7, 127.6, 69.6, 69.5, 44.7, 16.0, 15.9.  $^{31}\text{P}$  NMR (162 MHz,  $\text{CDCl}_3$ ):  $\delta$  7.5. IR (neat,  $\text{cm}^{-1}$ ): 3369, 3048, 2927, 2775, 2248, 1966, 1816, 1695, 1633, 1512, 1473, 1389, 1327, 1246, 1182, 1096, 1025, 914, 847, 760, 702, 625, 579, 514, 428. HRMS (ESI) Calcd for  $\text{C}_{26}\text{H}_{26}\text{N}_1\text{O}_5\text{P}_1$ :  $[\text{M}+\text{Na}]^+ = 486.1440$  Found: 486.1441.

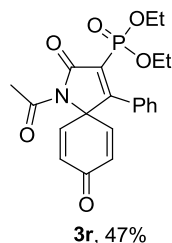

**diethyl (1-acetyl-2,8-dioxo-4-phenyl-1-azaspiro[4.5]deca-3,6,9-trien-3-yl)phosphonate 3r.**  
 Eluent: ethyl acetate/ petroleum ether (3:1). Light yellow solid, mp 123-125°C.  $^1\text{H}$  NMR ( $\text{CDCl}_3$ , 400 MHz)  $\delta$  7.41-7.37 (m, 1H), 7.31 (dd,  $J = 14.8\text{Hz}$ ,  $J = 7.6\text{Hz}$ , 2H), 7.12-7.09 (m, 2H), 6.55 (d,  $J = 10.0\text{Hz}$ , 2H), 6.35 (d,  $J = 10.0\text{Hz}$ , 2H), 4.13-4.03 (m, 4H), 2.61 (s, 3H), 1.10 (t,  $J = 7.2\text{Hz}$ , 6H).  $^{13}\text{C}$  NMR ( $\text{CDCl}_3$ , 100 MHz)  $\delta$  183.5, 168.9, 168.4, 168.3, 166.7, 166.5, 142.6, 132.6, 130.1, 129.4, 129.3, 128.2, 128.2, 127.6, 25.6, 16.0, 16.0.  $^{31}\text{P}$  NMR (162 MHz,  $\text{CDCl}_3$ ):  $\delta$  5.8. IR (neat,  $\text{cm}^{-1}$ ): 3406, 3058, 2928, 2368, 2248, 1971, 1854, 1738, 1668, 1547, 1443, 1371, 1203, 1227, 1160, 1044, 869, 794, 699, 626, 533, 468. HRMS (ESI) Calcd for  $\text{C}_{21}\text{H}_{22}\text{N}_1\text{O}_6\text{P}_1$ :  $[\text{M}+\text{Na}]^+ = 438.1068$  Found: 438.1077.

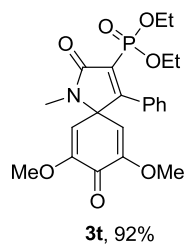

## diethyl

**(7,9-dimethoxy-1-methyl-2,8-dioxo-4-phenyl-1-azaspiro[4.5]deca-3,6,9-trien-3-yl)phosphonate 3t.** Eluent: ethyl acetate/ petroleum ether (3:1). Light yellow solid, mp 226-228°C. <sup>1</sup>H NMR (CDCl<sub>3</sub>, 400 MHz) δ 7.38-7.34 (m, 1H), 7.32-7.28 (m, 2H), 7.18-7.16 (m, 2H), 5.40 (s, 2H), 4.13-3.98 (m, 4H), 3.67 (s, 6H), 2.86 (s, 3H). <sup>13</sup>C NMR (CDCl<sub>3</sub>, 100 MHz) δ 174.8, 167.8, 167.7, 167.1, 167.0, 153.6, 131.1, 131.0, 130.8, 129.6, 128.7, 128.4, 127.8, 127.7, 126.3, 110.4, 69.3, 69.2, 62.7, 62.7, 55.8, 25.5, 15.9, 15.9. <sup>31</sup>P NMR (162 MHz, CDCl<sub>3</sub>): δ 8.0. IR (neat, cm<sup>-1</sup>): 3344, 3063, 2927, 2854, 2377, 2253, 1953, 1726, 1651, 1594, 1460, 1383, 1260, 1110, 1043, 911, 802, 735, 648, 574, 508. HRMS (ESI) Calcd for C<sub>22</sub>H<sub>26</sub>N<sub>1</sub>O<sub>7</sub>P<sub>1</sub>: [M+Na]<sup>+</sup> = 470.1332 Found: 470.1339.

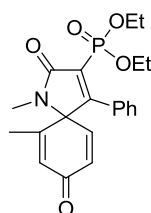

**3u**, 16%

**diethyl (1,6-dimethyl-2,8-dioxo-4-phenyl-1-azaspiro[4.5]deca-3,6,9-trien-3-yl)phosphonate 3u.** Eluent: ethyl acetate/ petroleum ether (3:1). Light yellow liquide. <sup>1</sup>H NMR (CDCl<sub>3</sub>, 400 MHz) δ 7.41-7.37 (m, 1H), 7.43-7.30 (m, 2H), 7.25-7.22 (m, 2H), 6.51-6.44 (m, 2H), 6.31 (t, *J* = 1.6Hz, 1H), 4.15-4.01 (m, 4H), 2.80 (s, 3H), 1.80 (d, *J* = 1.2Hz, 3H), 1.12 (t, *J* = 6.8Hz, 6H). <sup>13</sup>C NMR (CDCl<sub>3</sub>, 100 MHz) δ 184.2, 168.3, 168.1, 165.9, 165.9, 152.0, 143.7, 133.3, 132.4, 130.7, 130.7, 130.2, 128.2, 128.1, 127.8, 127.8, 71.7, 63.0, 63.0, 62.9, 62.9, 29.7, 25.7, 17.7, 16.1, 16.0. <sup>31</sup>P NMR (162 MHz, CDCl<sub>3</sub>): δ 7.4, 7.3. IR (neat, cm<sup>-1</sup>): 3449, 3055, 2928, 2373, 2244, 1967, 1699, 1638, 1574, 1442, 1384, 1333, 1246, 1165, 1098, 1045, 917, 816, 732, 646, 574, 483. HRMS (ESI) Calcd for C<sub>21</sub>H<sub>24</sub>N<sub>1</sub>O<sub>5</sub>P<sub>1</sub>: [M+Na]<sup>+</sup> = 424.1274 Found: 424.1284.

## References

- [1] (a) L-J. Wang, H-T. Zhu, Y-F. Qiu, X-Y. Liu and Y-M. Liang, *Org. Biomol. Chem.*, 2014, 12, 643. (b) Daniel. M.D'Souza, A. Kiel, D.-Peter. Herten, F. Rominger, T. J. J. Müller, *Chem. Eur. J.* **2008**, 14,529.

## X-ray diffraction analysis of compound 3a

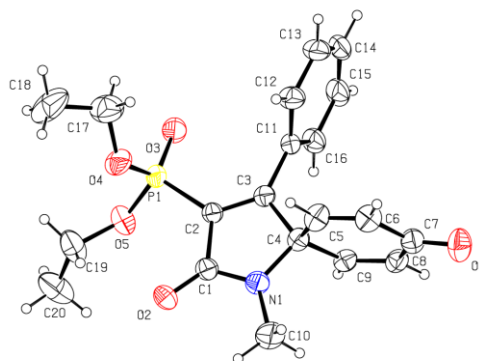

### X-ray structure of 3a (CCDC 1022183)

Bond precision: C-C = 0.0037 Å Wavelength=1.54184  
Cell: a=8.3849 (3) b=12.0609 (4) c=19.3266 (6)  
alpha=90 beta=95.801 (3) gamma=90  
Temperature: 293 K

|                        | Calculated     | Reported                         |
|------------------------|----------------|----------------------------------|
| Volume                 | 1944.48 (11)   | 1944.50 (12)                     |
| Space group            | P 21/n         | P 1 21/n 1                       |
| Hall group             | -P 2yn         | -P 2yn                           |
| Moiety formula         | C20 H22 N O5 P | C20 H22 N O5 P                   |
| Sum formula            | C20 H22 N O5 P | C20 H22 N O5 P                   |
| Mr                     | 387.36         | 387.36                           |
| Dx, g cm <sup>-3</sup> | 1.323          | 1.323                            |
| Z                      | 4              | 4                                |
| Mu (mm <sup>-1</sup> ) | 1.519          | 1.519                            |
| F000                   | 816.0          | 816.0                            |
| F000'                  | 819.64         |                                  |
| h, k, lmax             | 10, 14, 23     | 10, 14, 23                       |
| Nref                   | 3678           | 3611                             |
| Tmin, Tmax             | 0.697, 0.749   | 0.772, 1.000                     |
| Tmin'                  | 0.632          |                                  |
| Correction method=     | MULTI-SCAN     |                                  |
| Data completeness=     | 0.982          | Theta (max)= 69.880              |
| R(reflections)=        | 0.0497 ( 2887) | wR2(reflections)= 0.1501 ( 3611) |
| S =                    | 1.037          | Npar= 247                        |



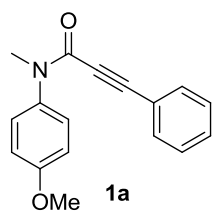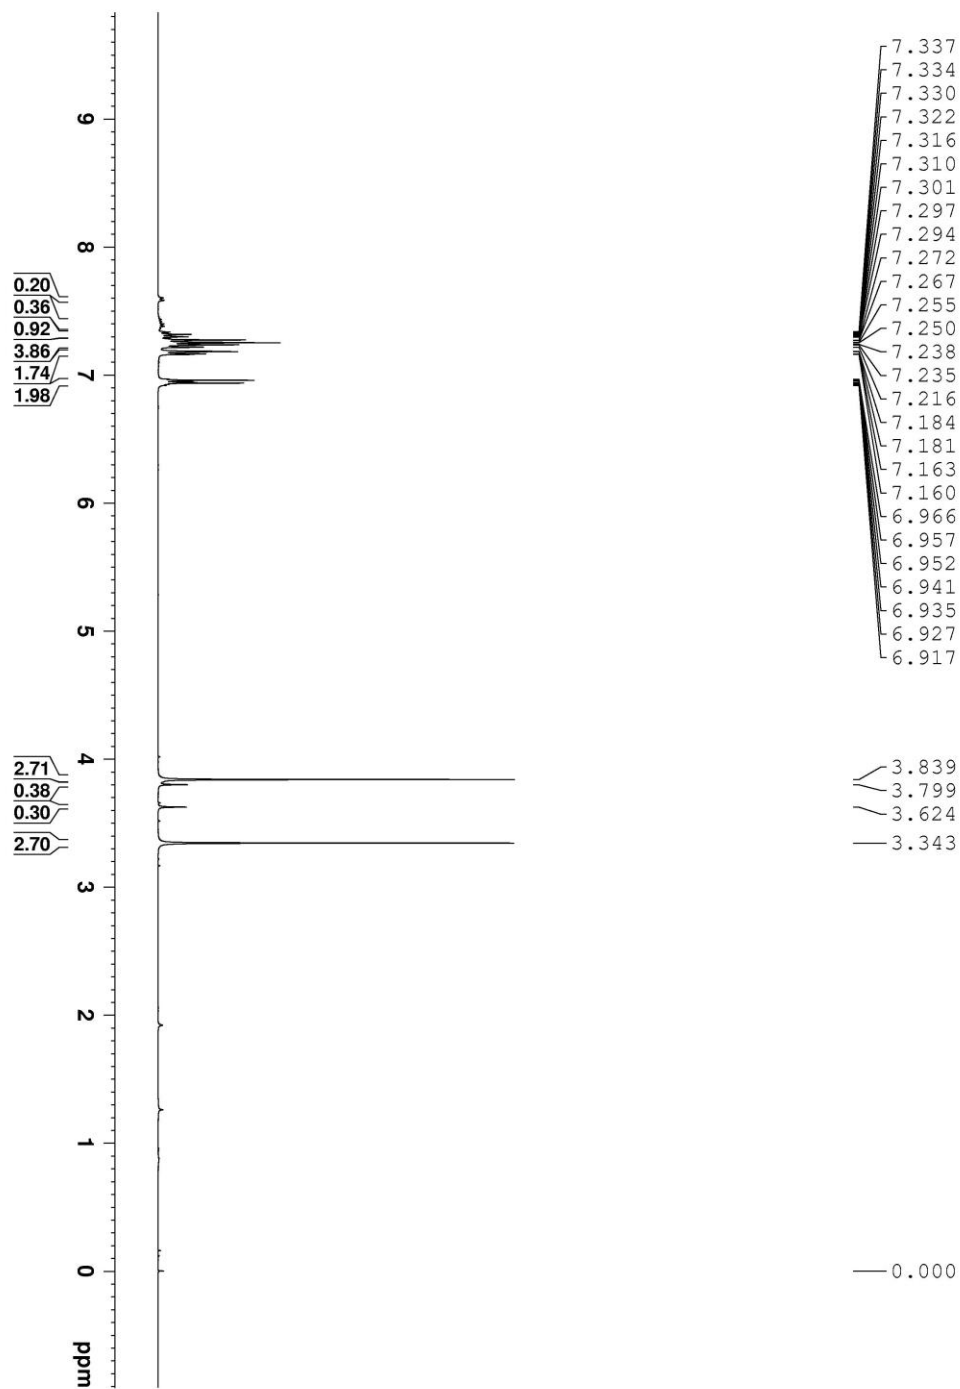

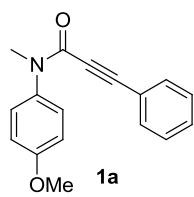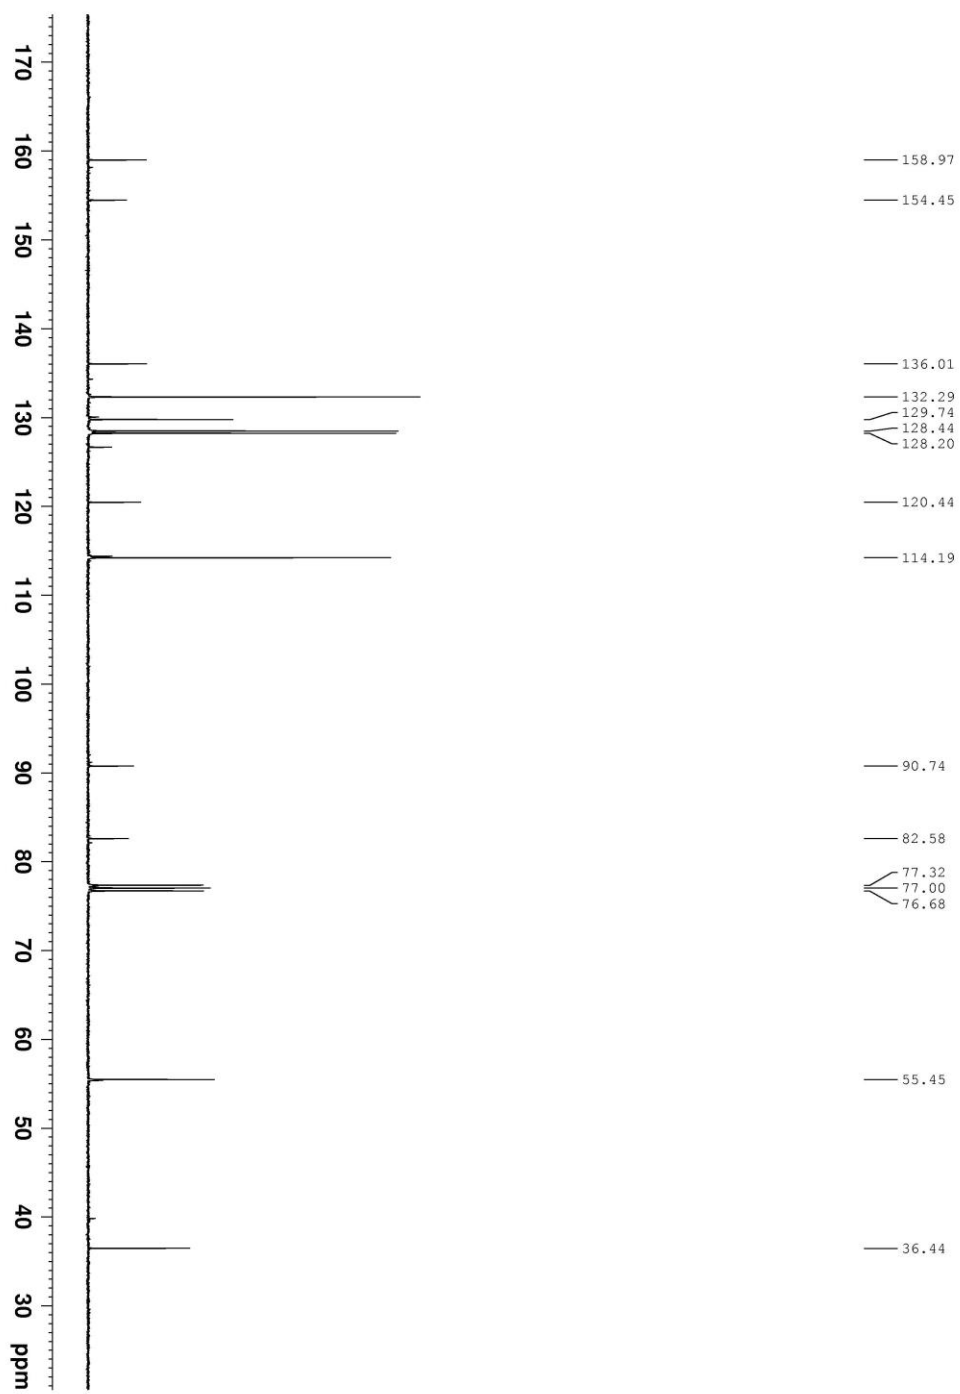

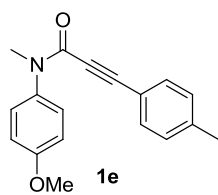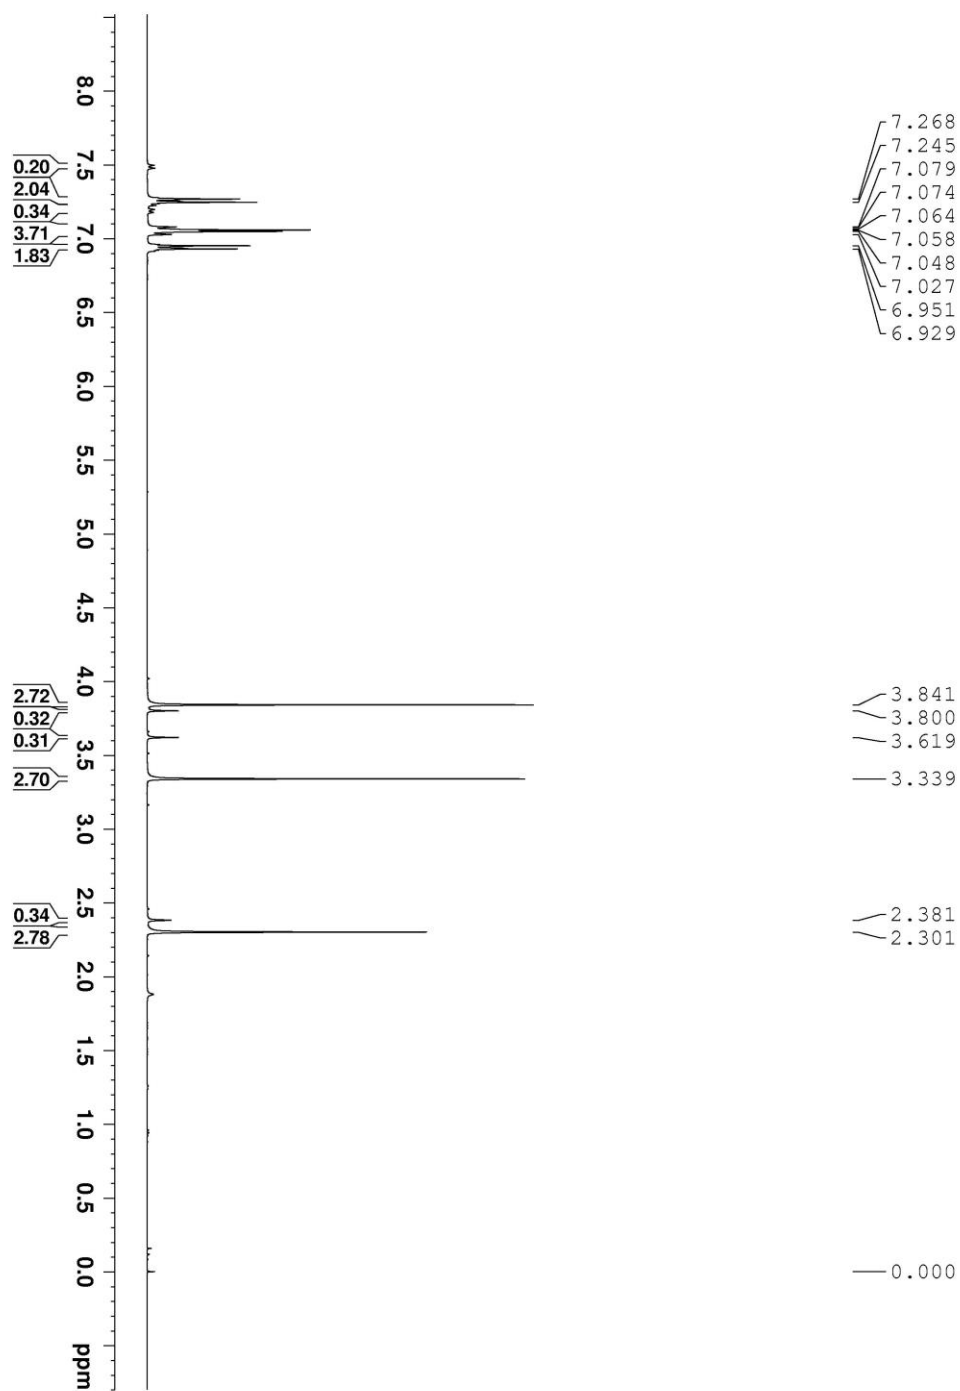

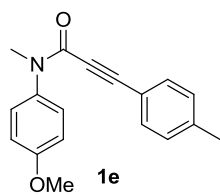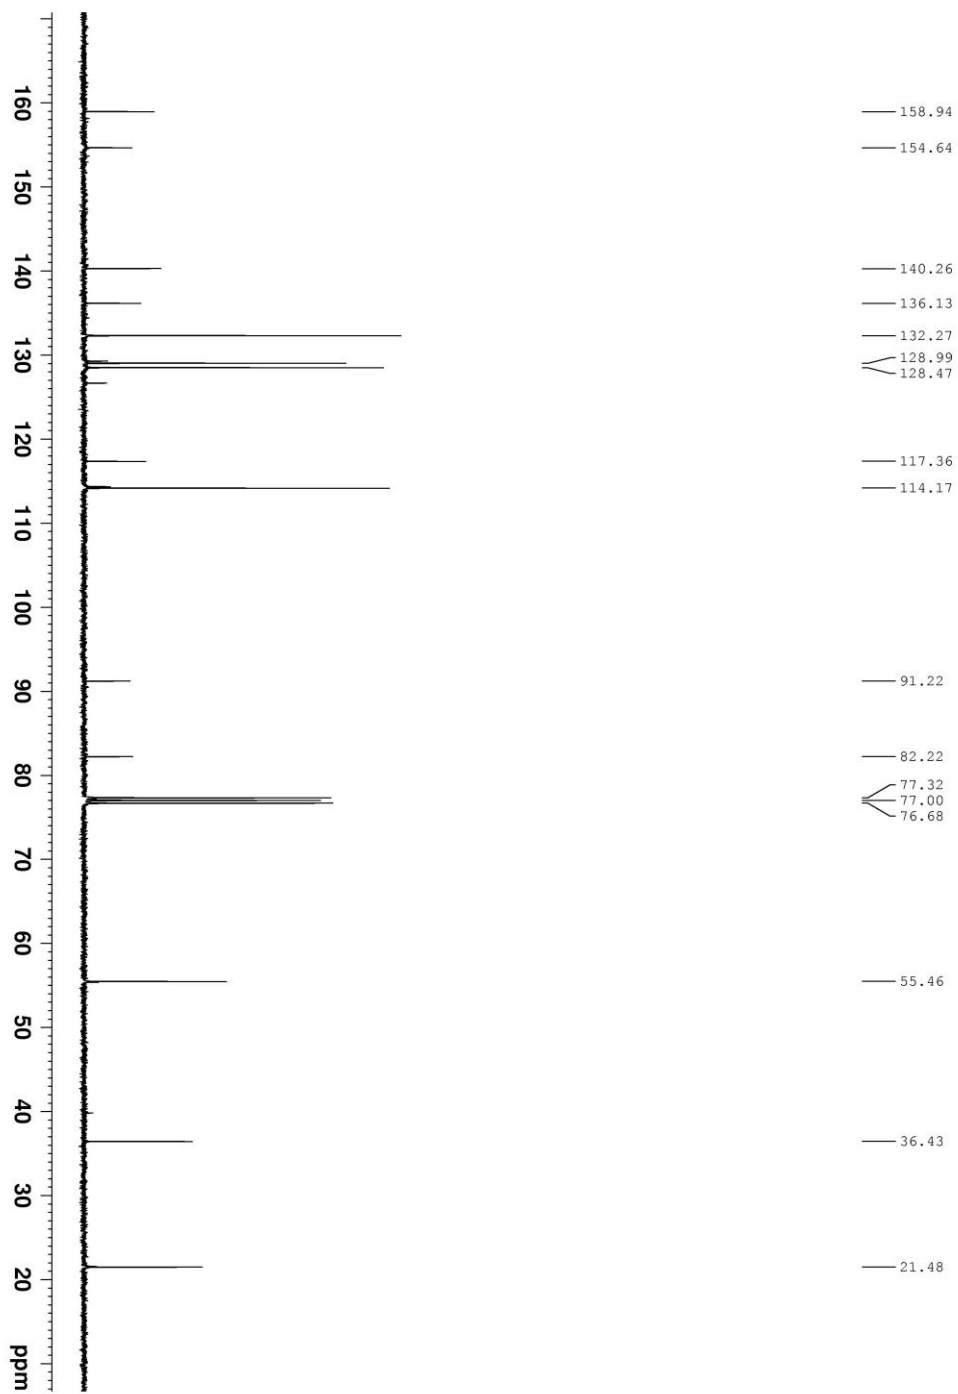

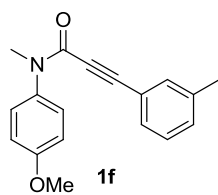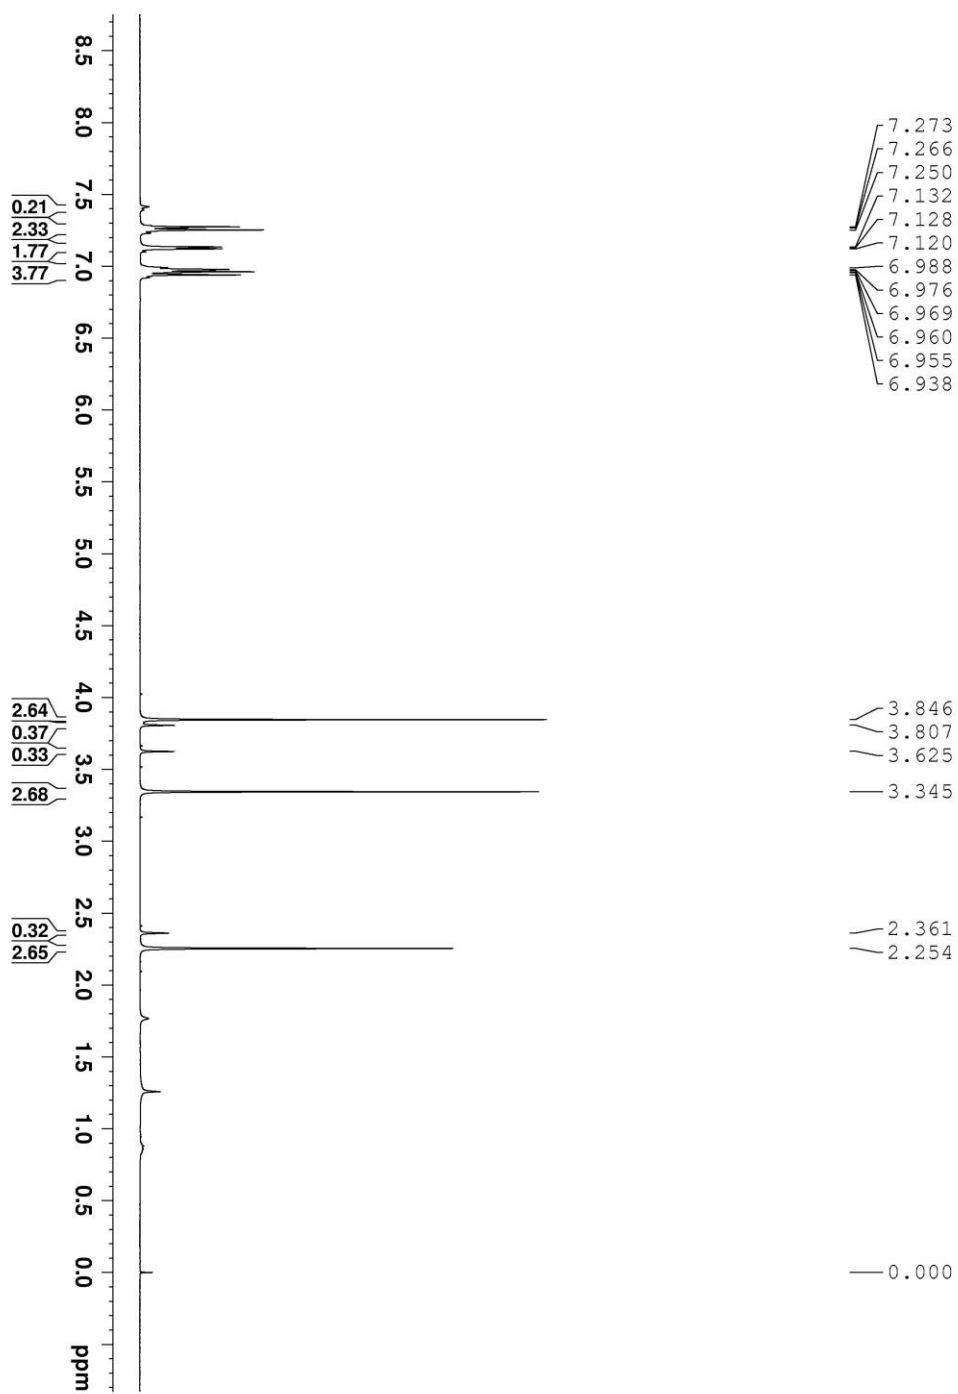

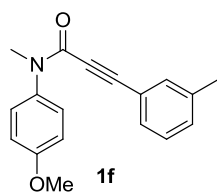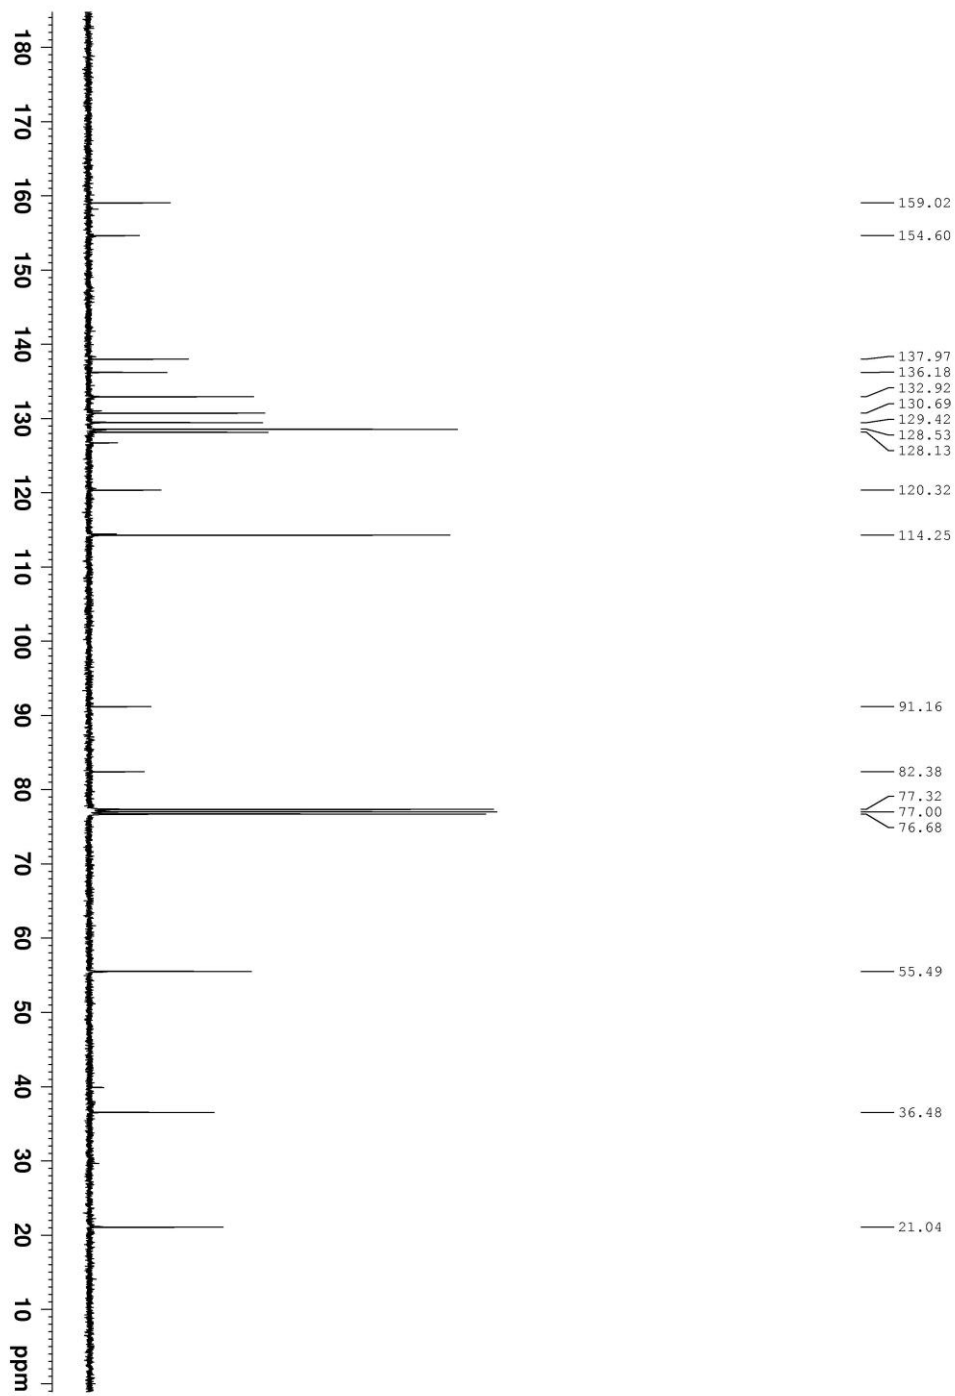

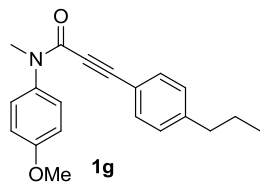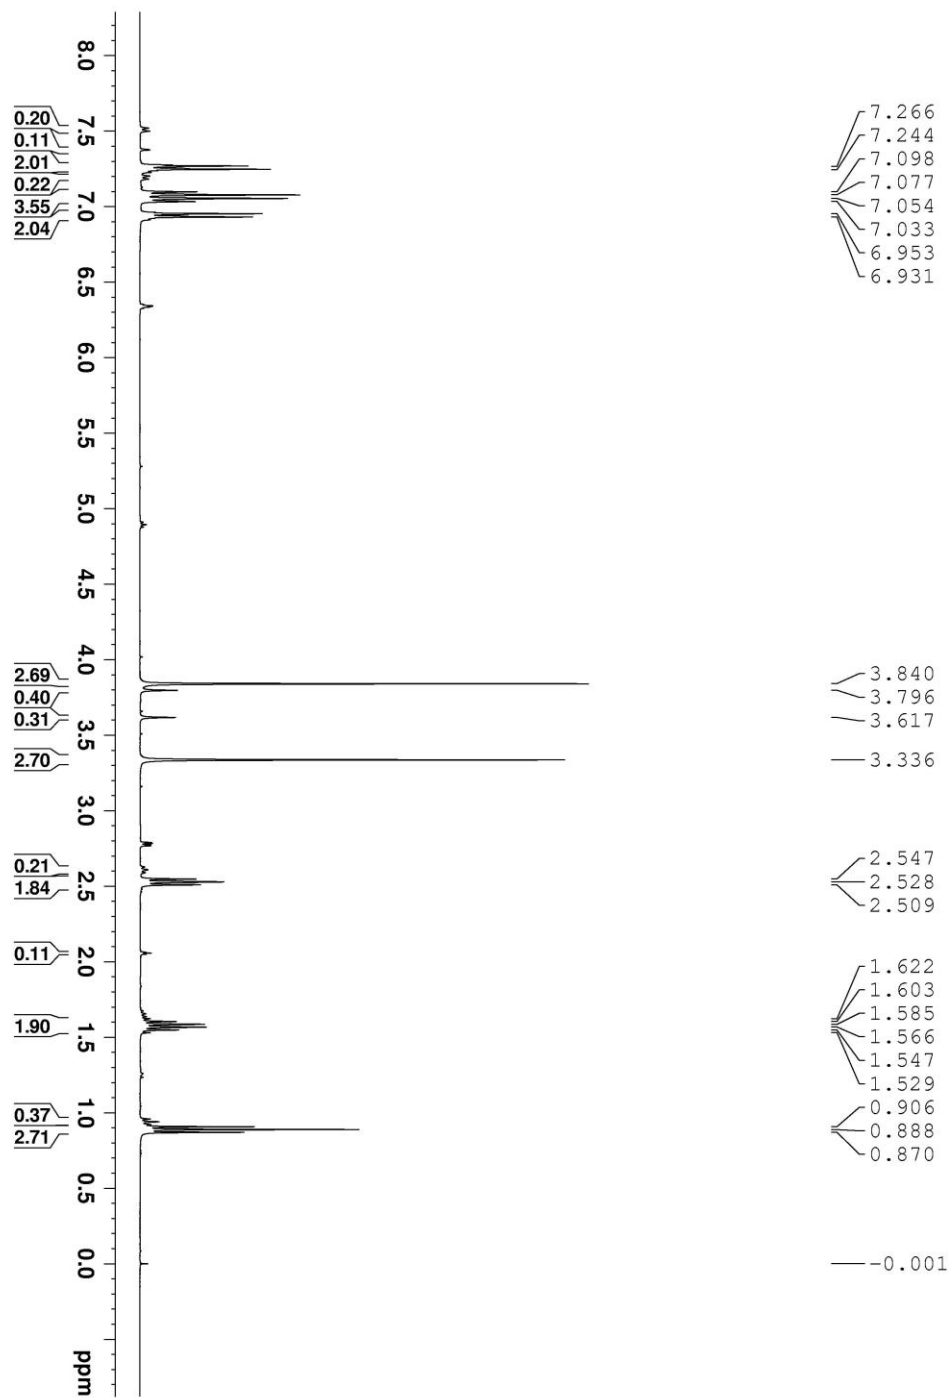

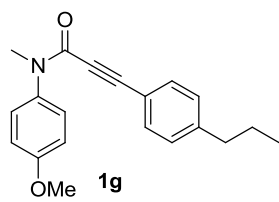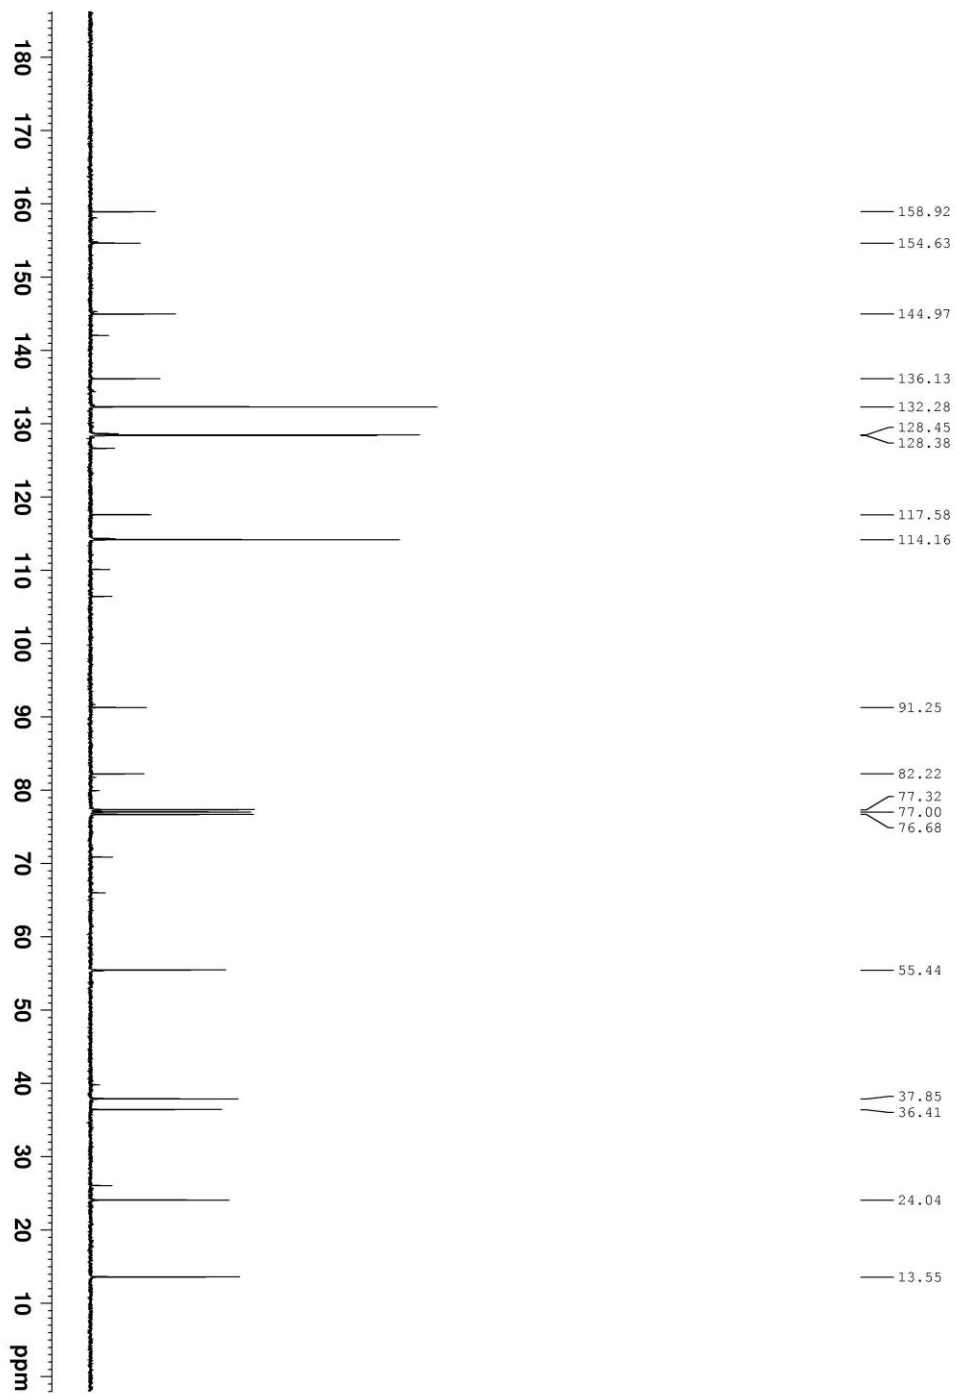



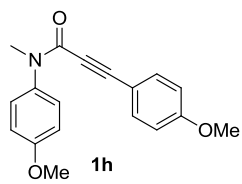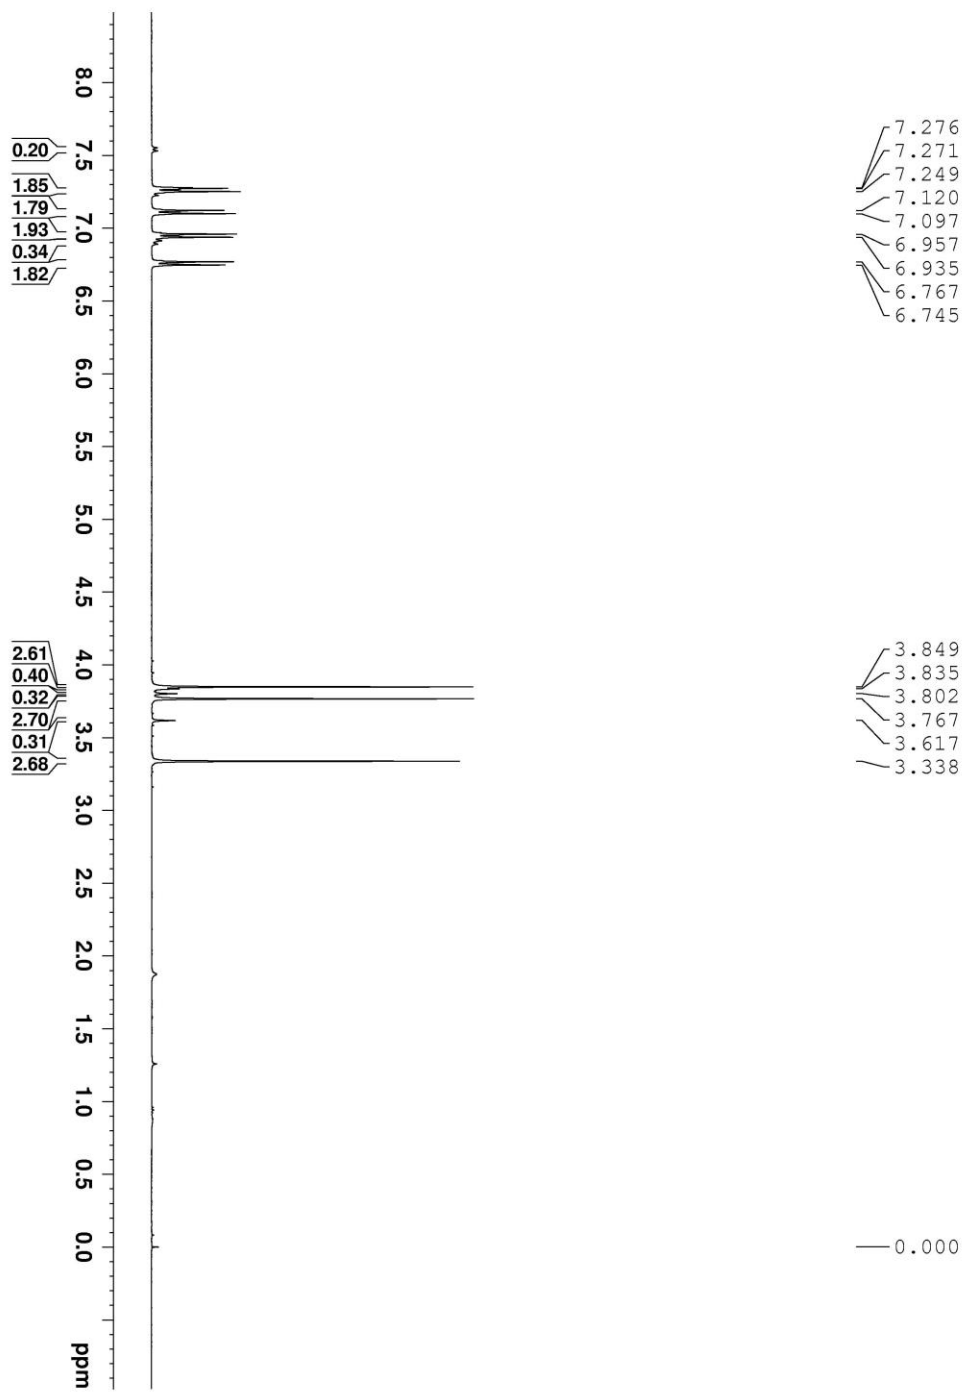

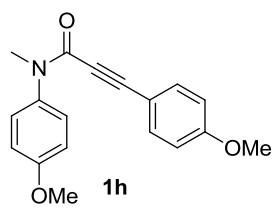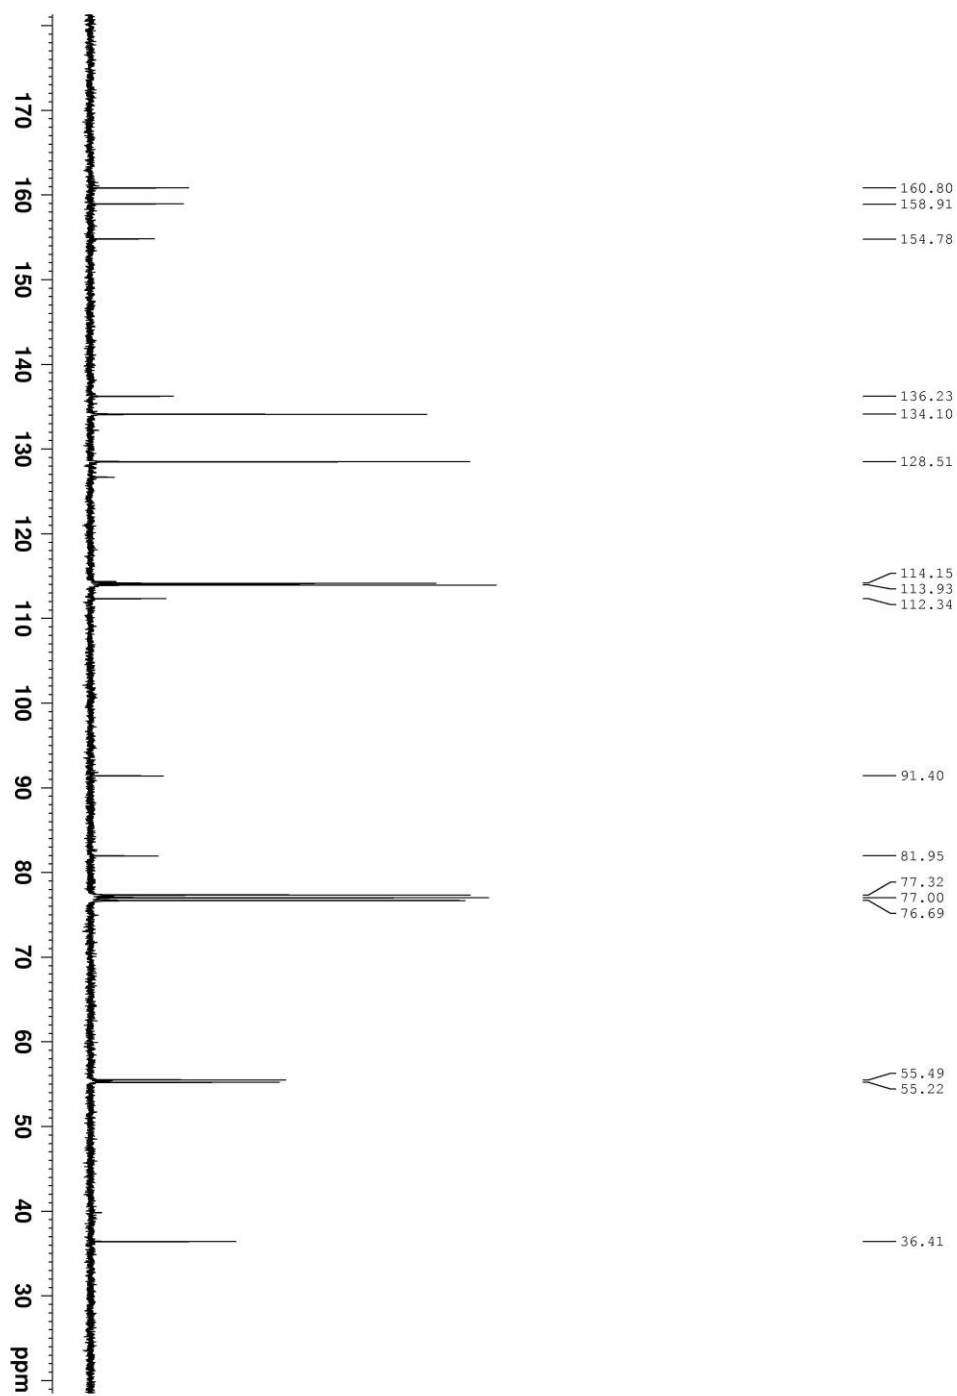

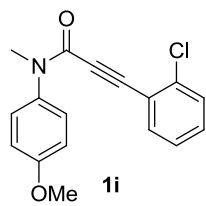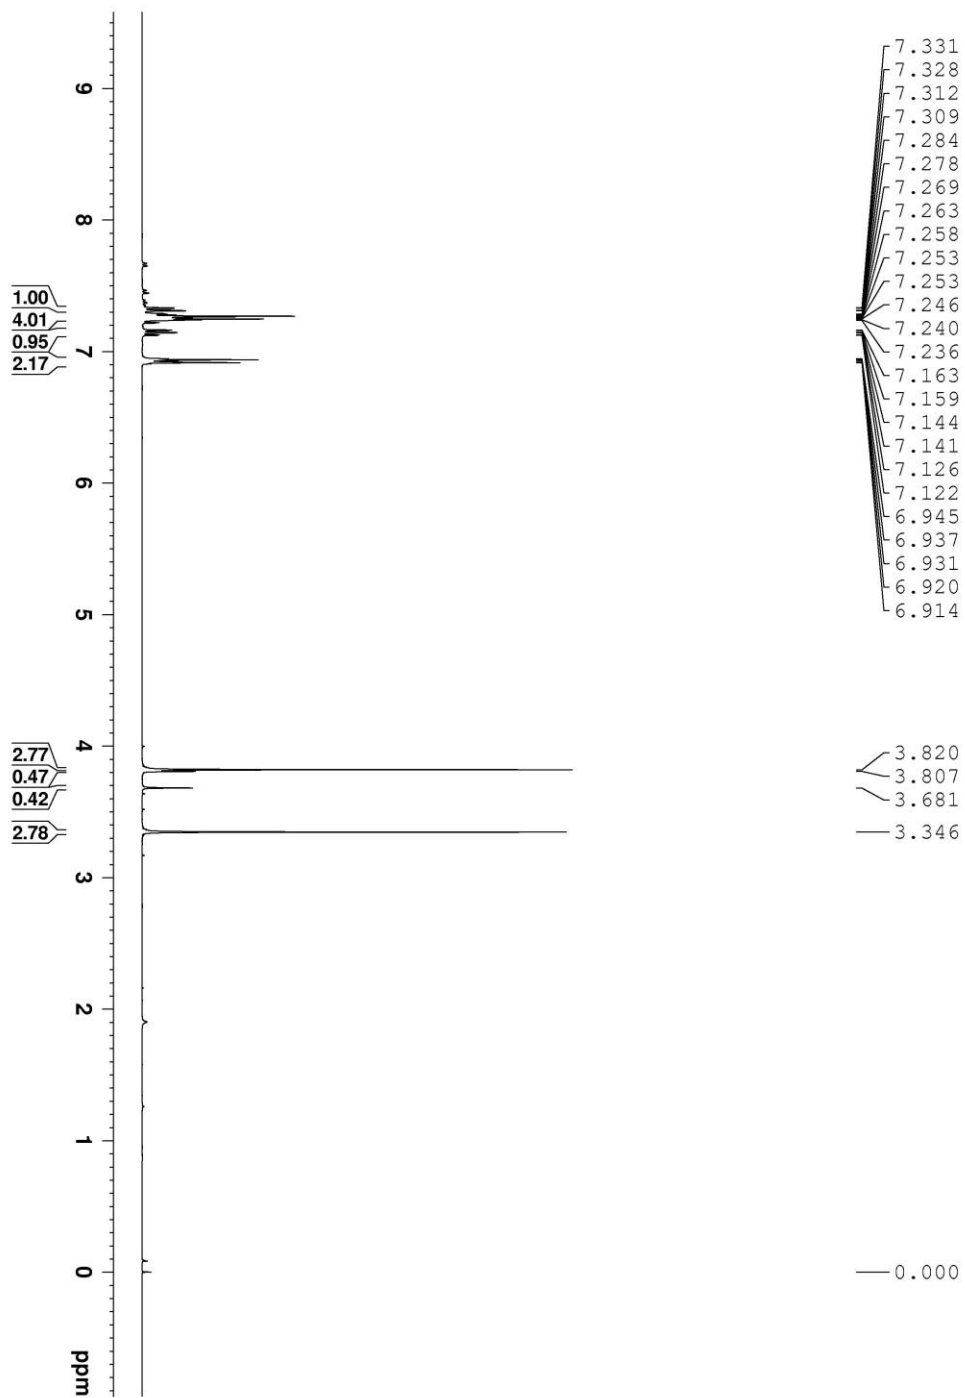

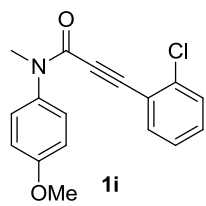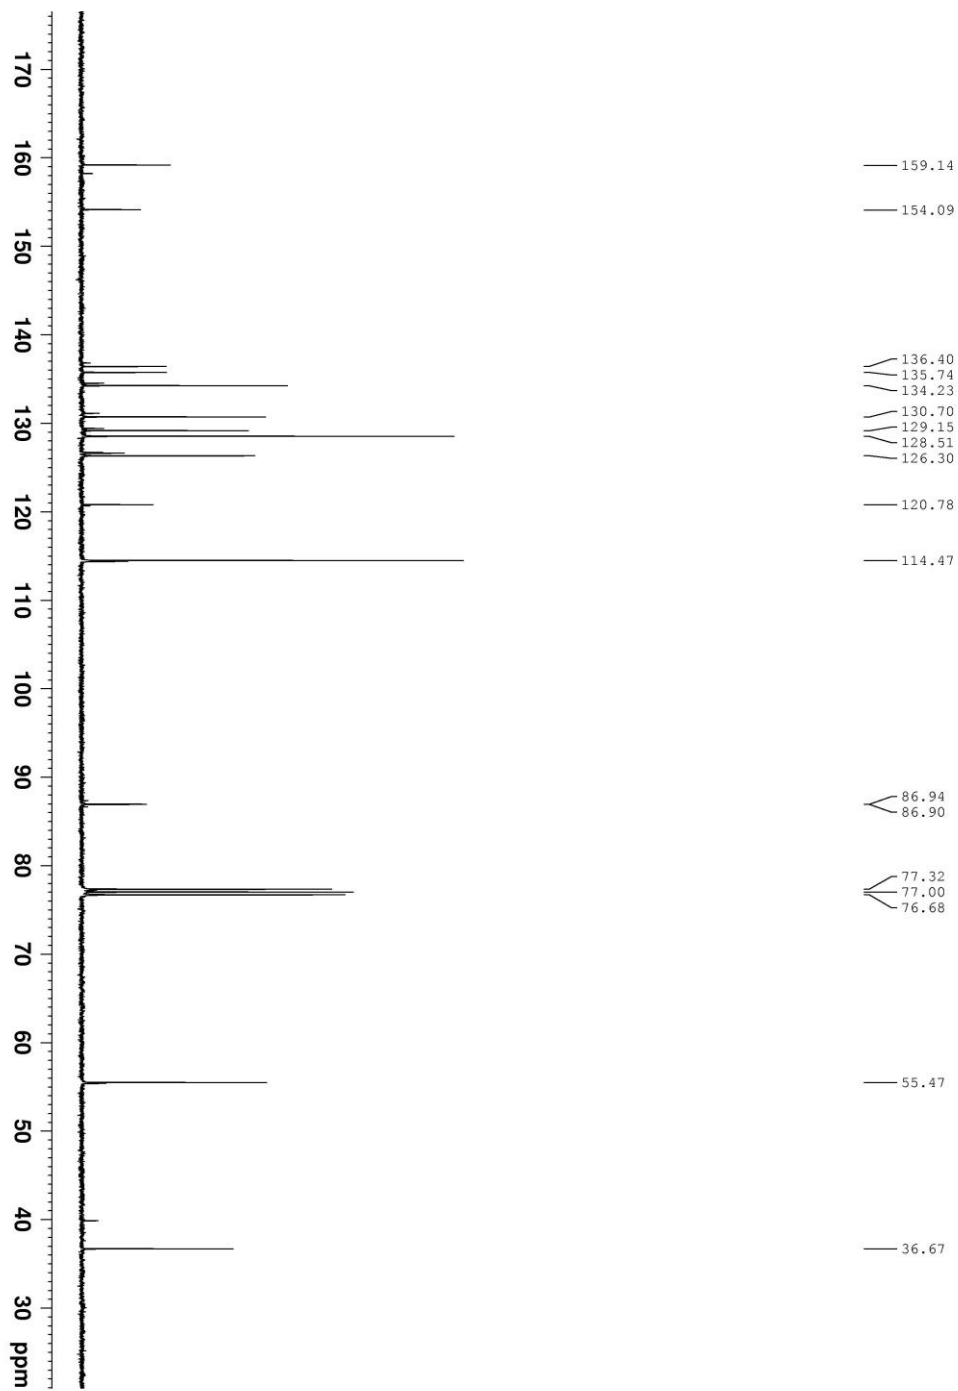

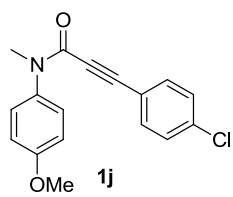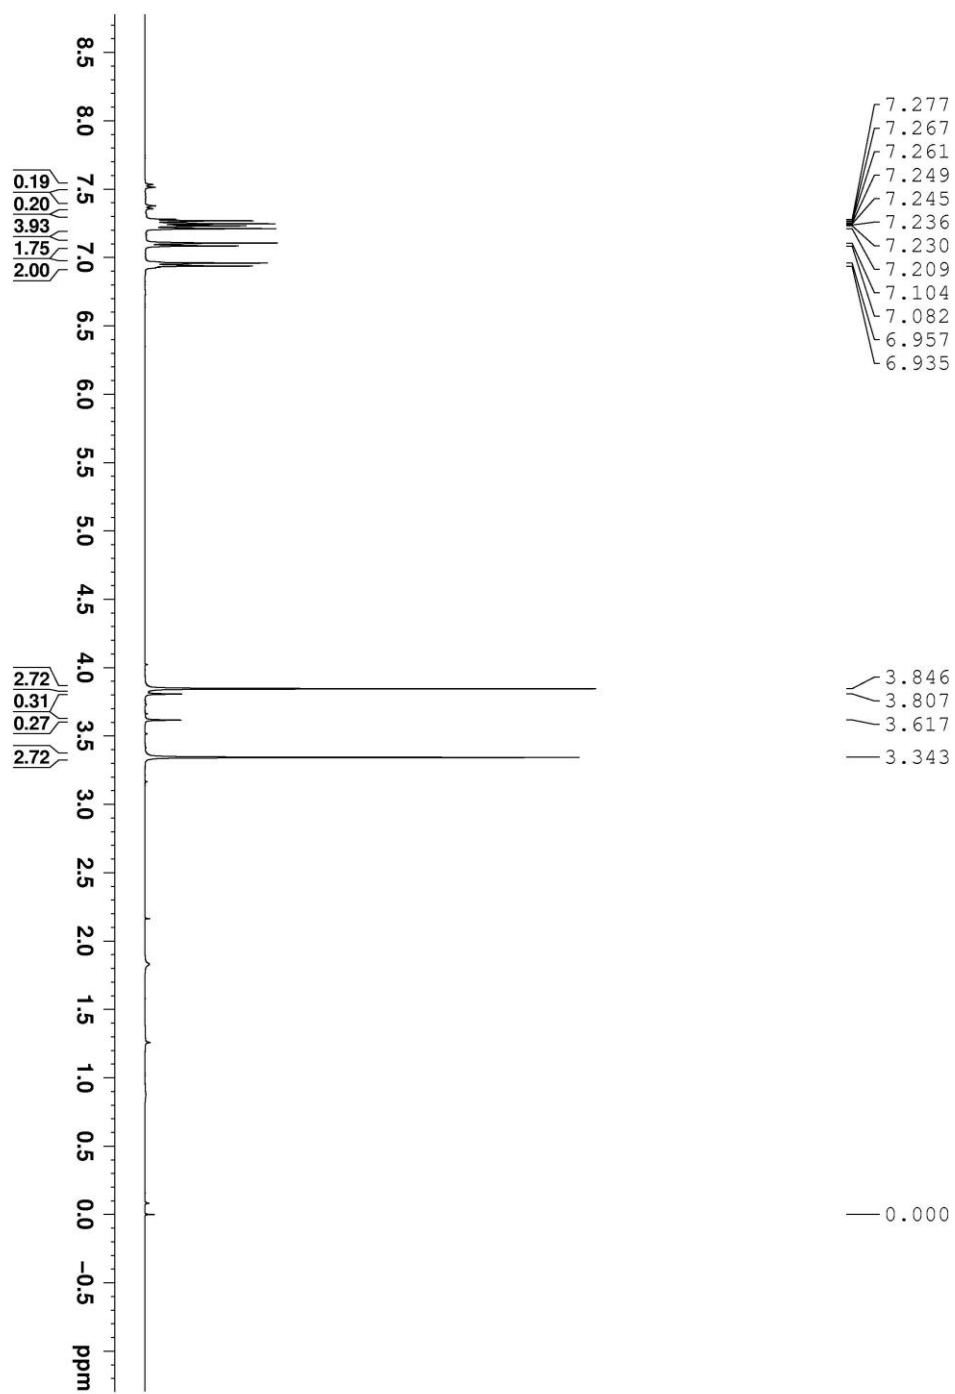

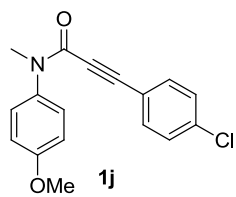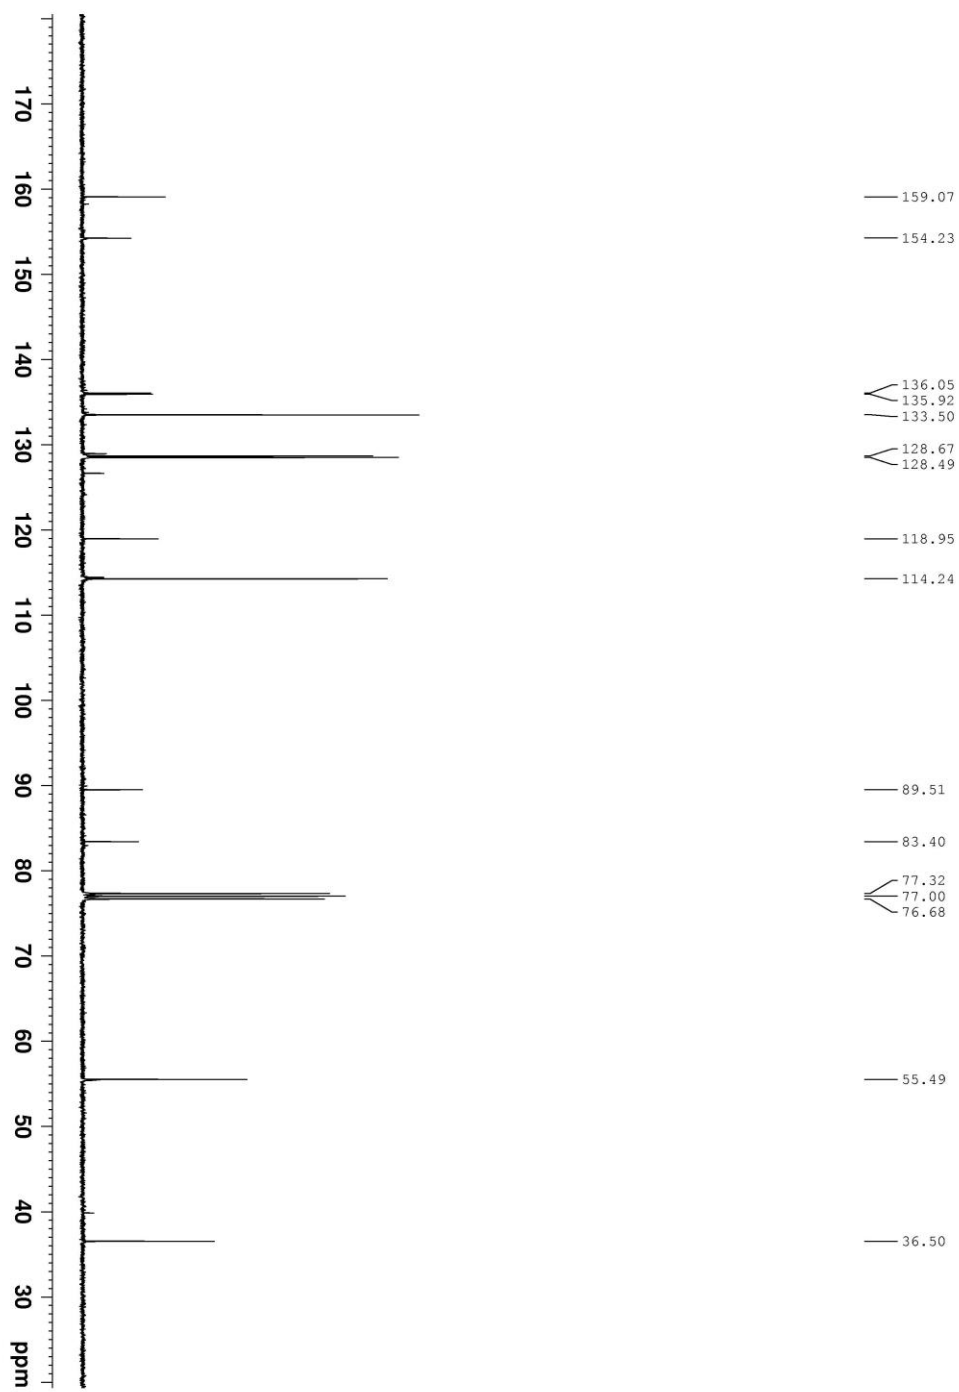

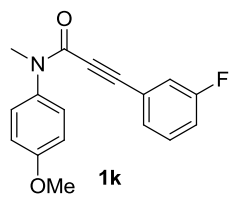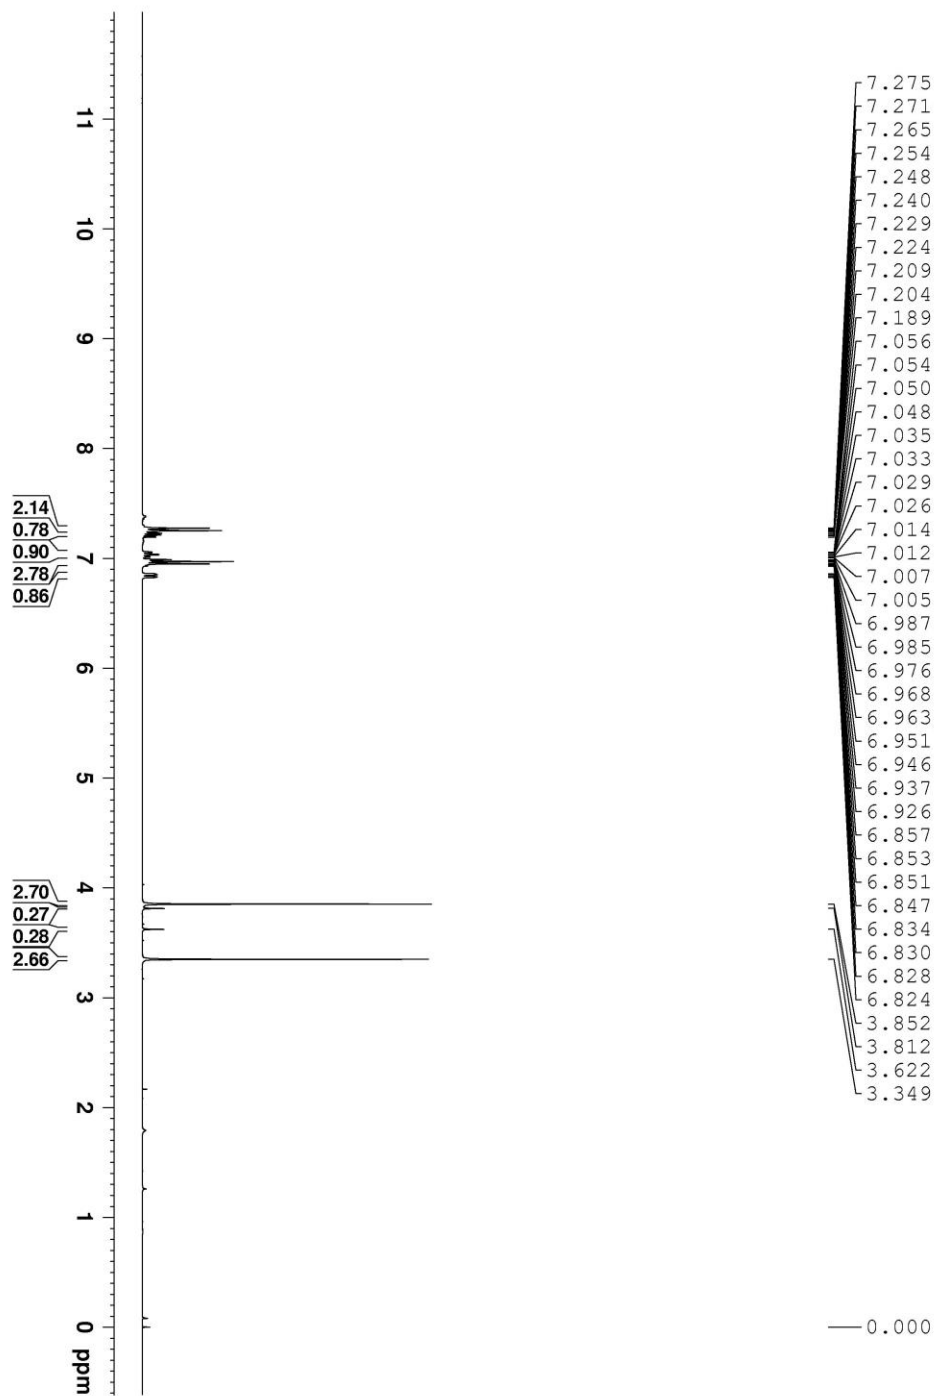

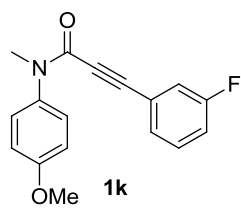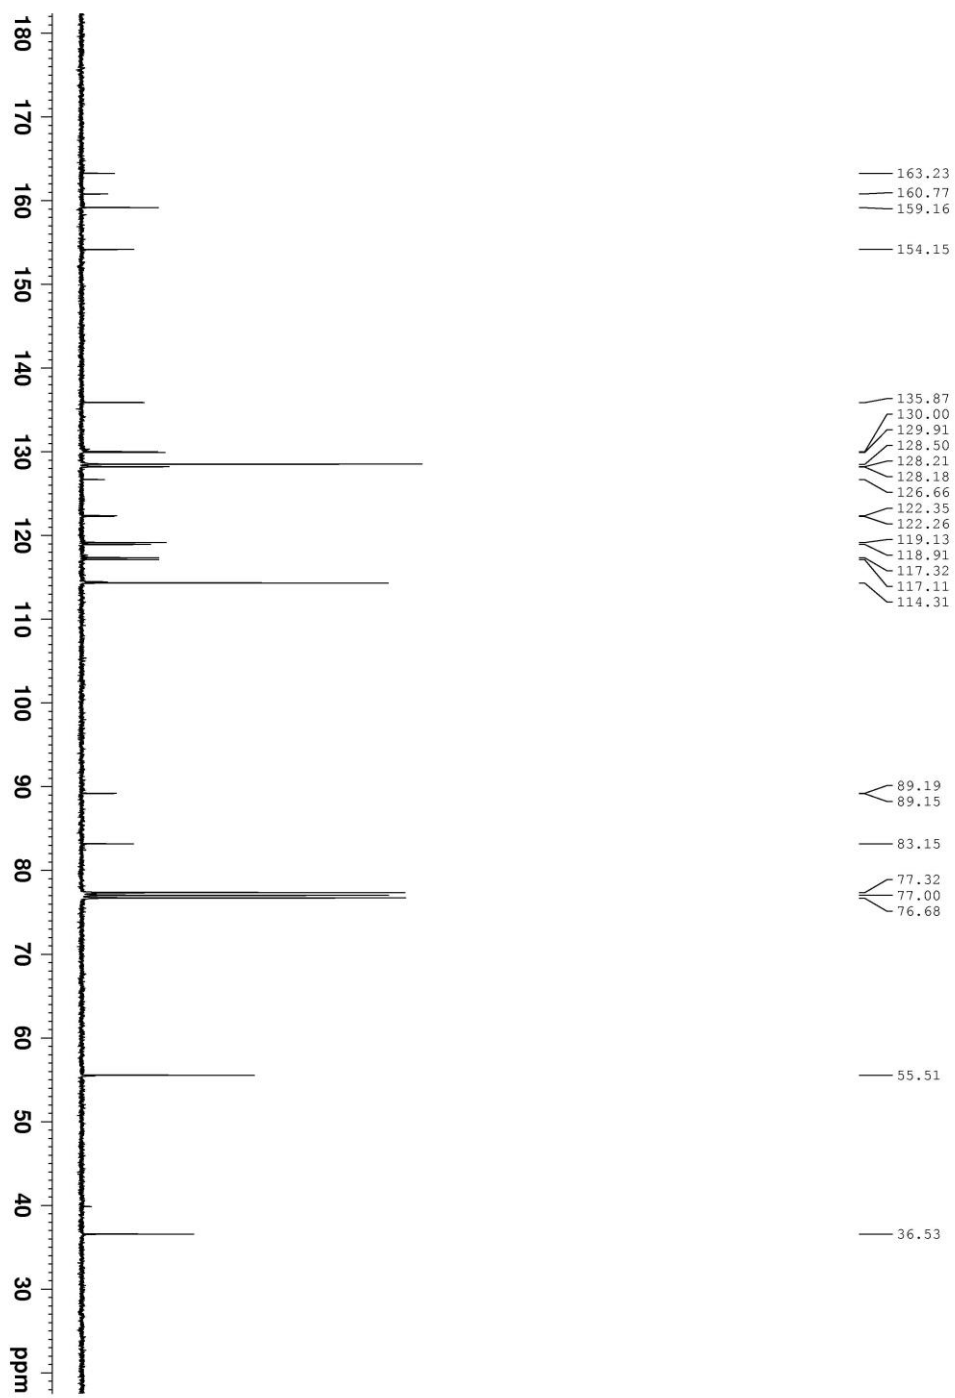



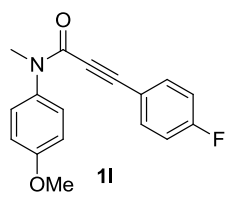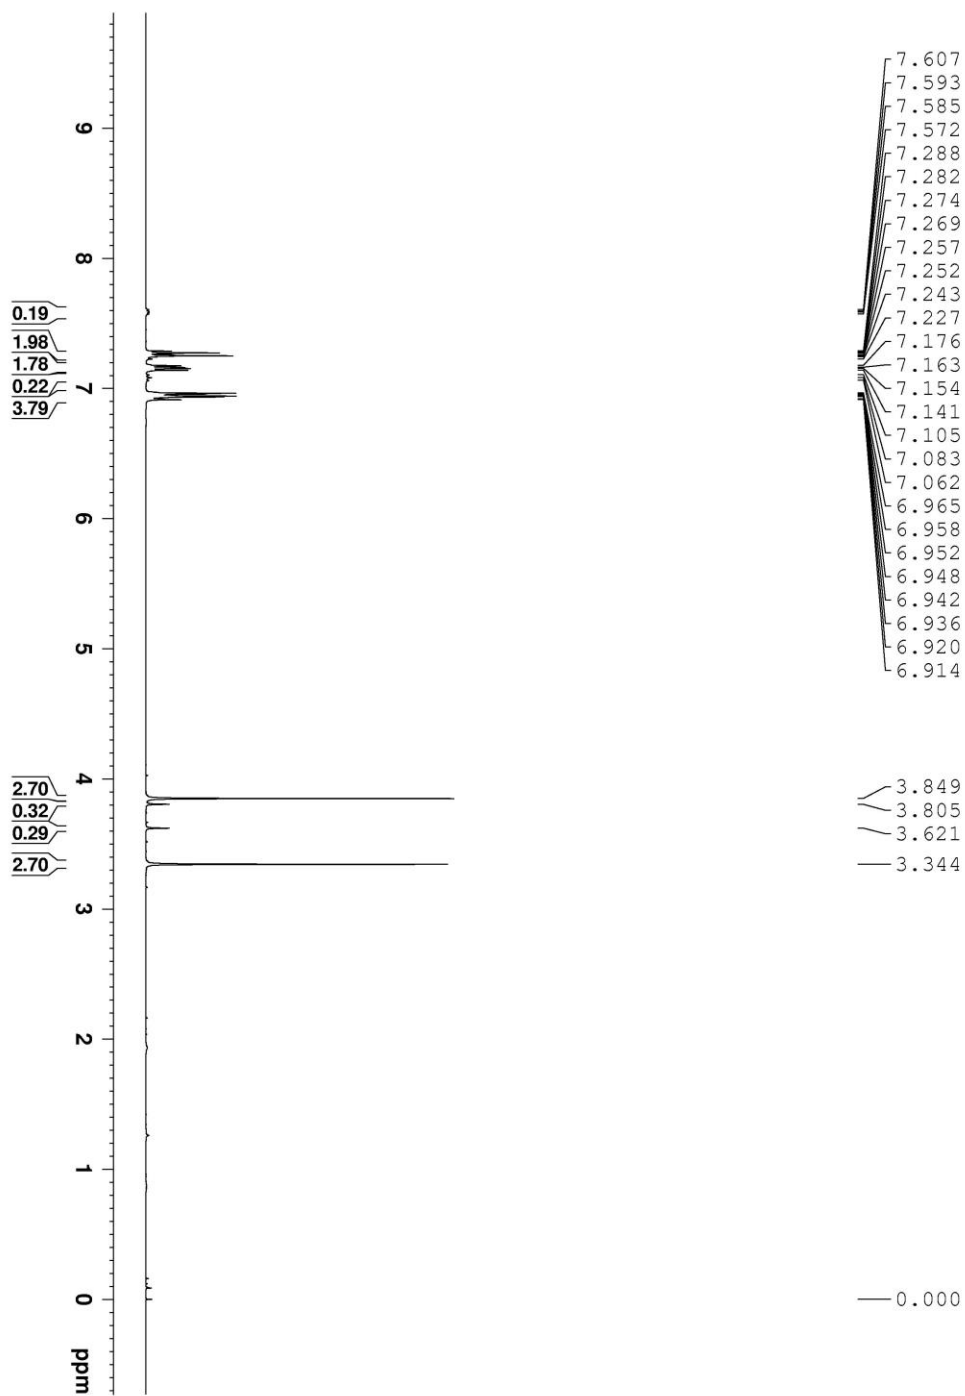

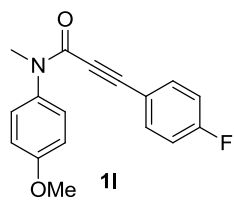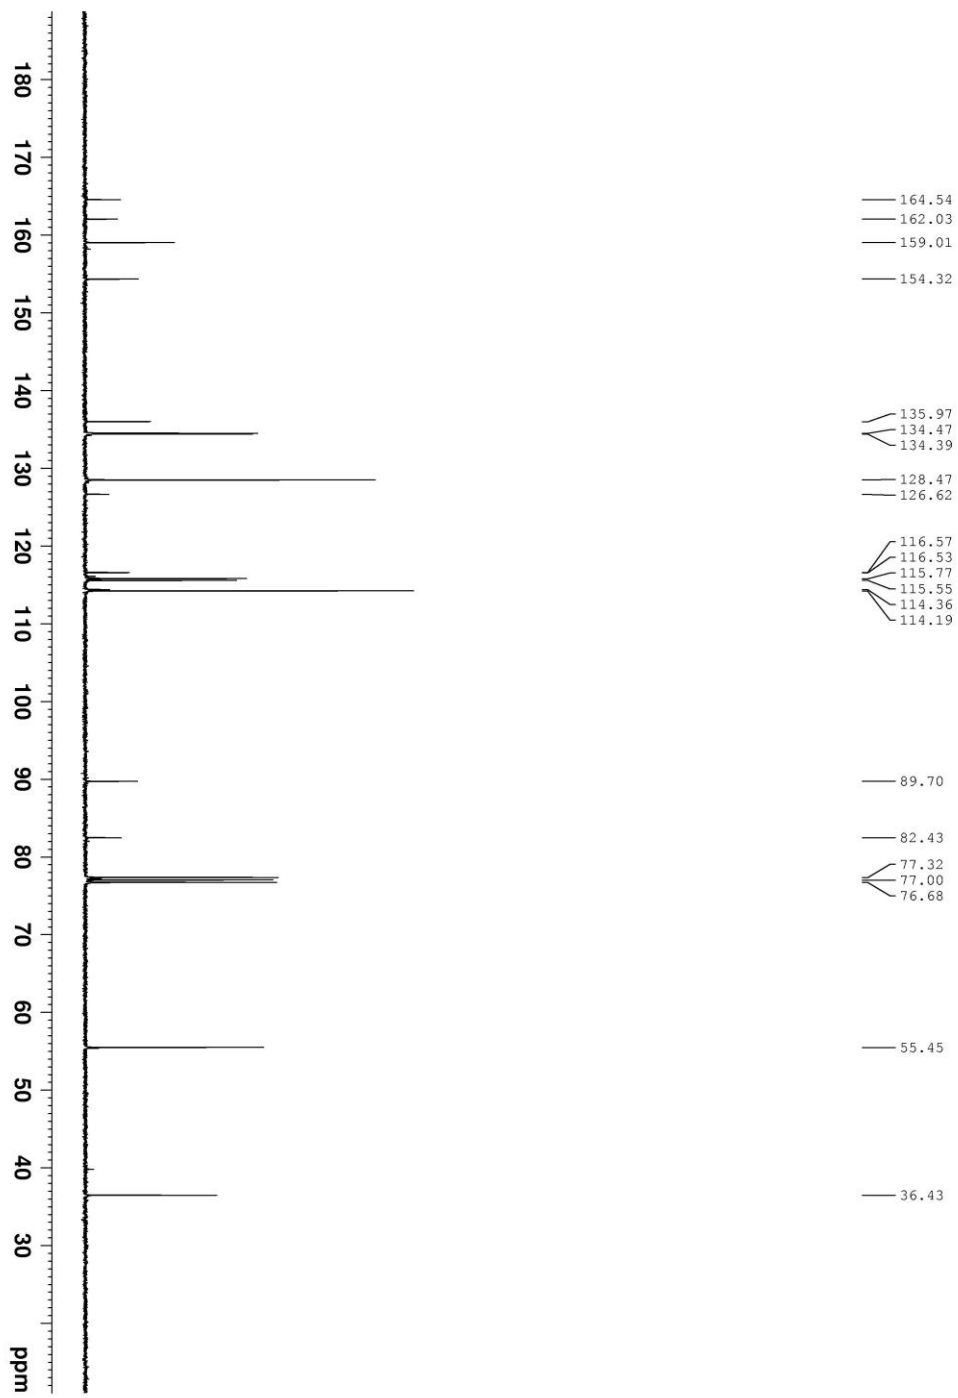

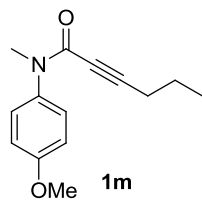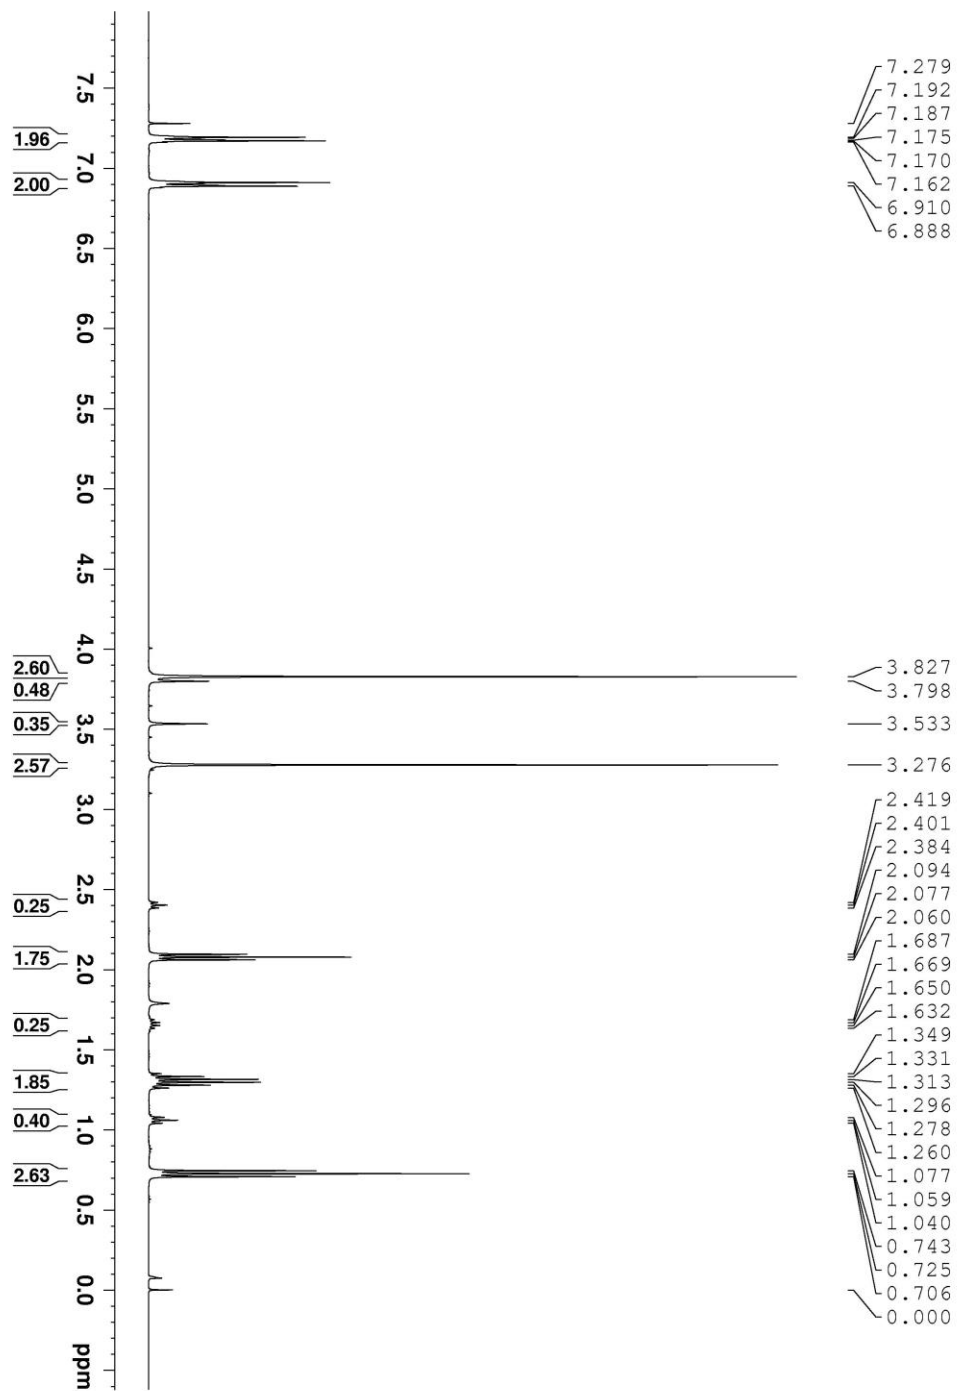

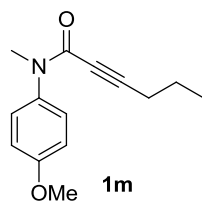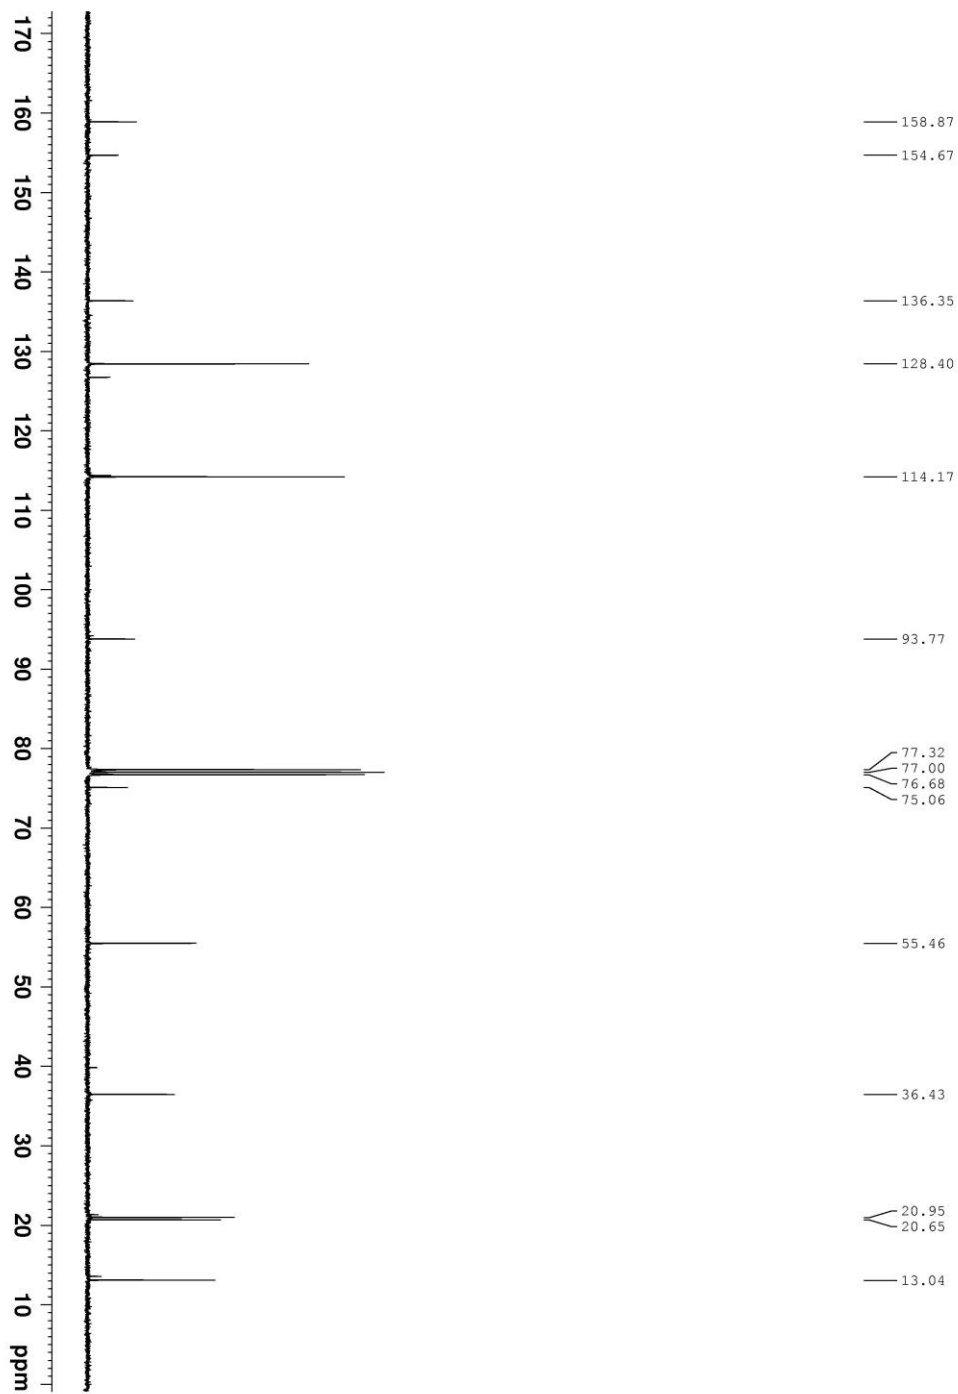

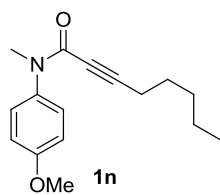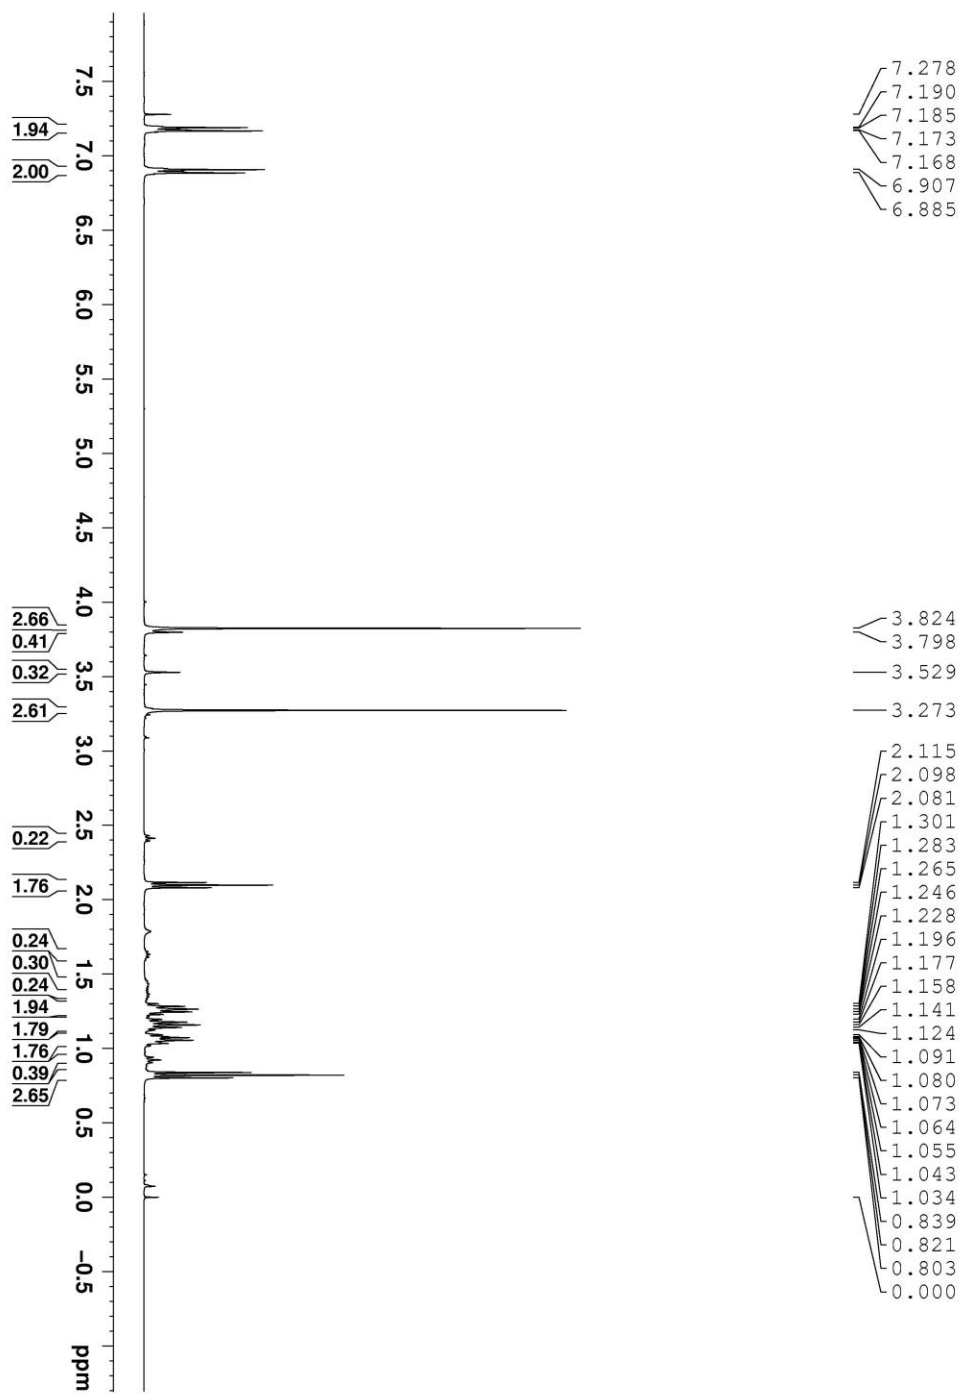

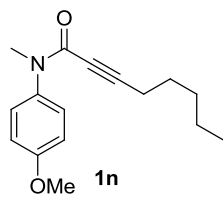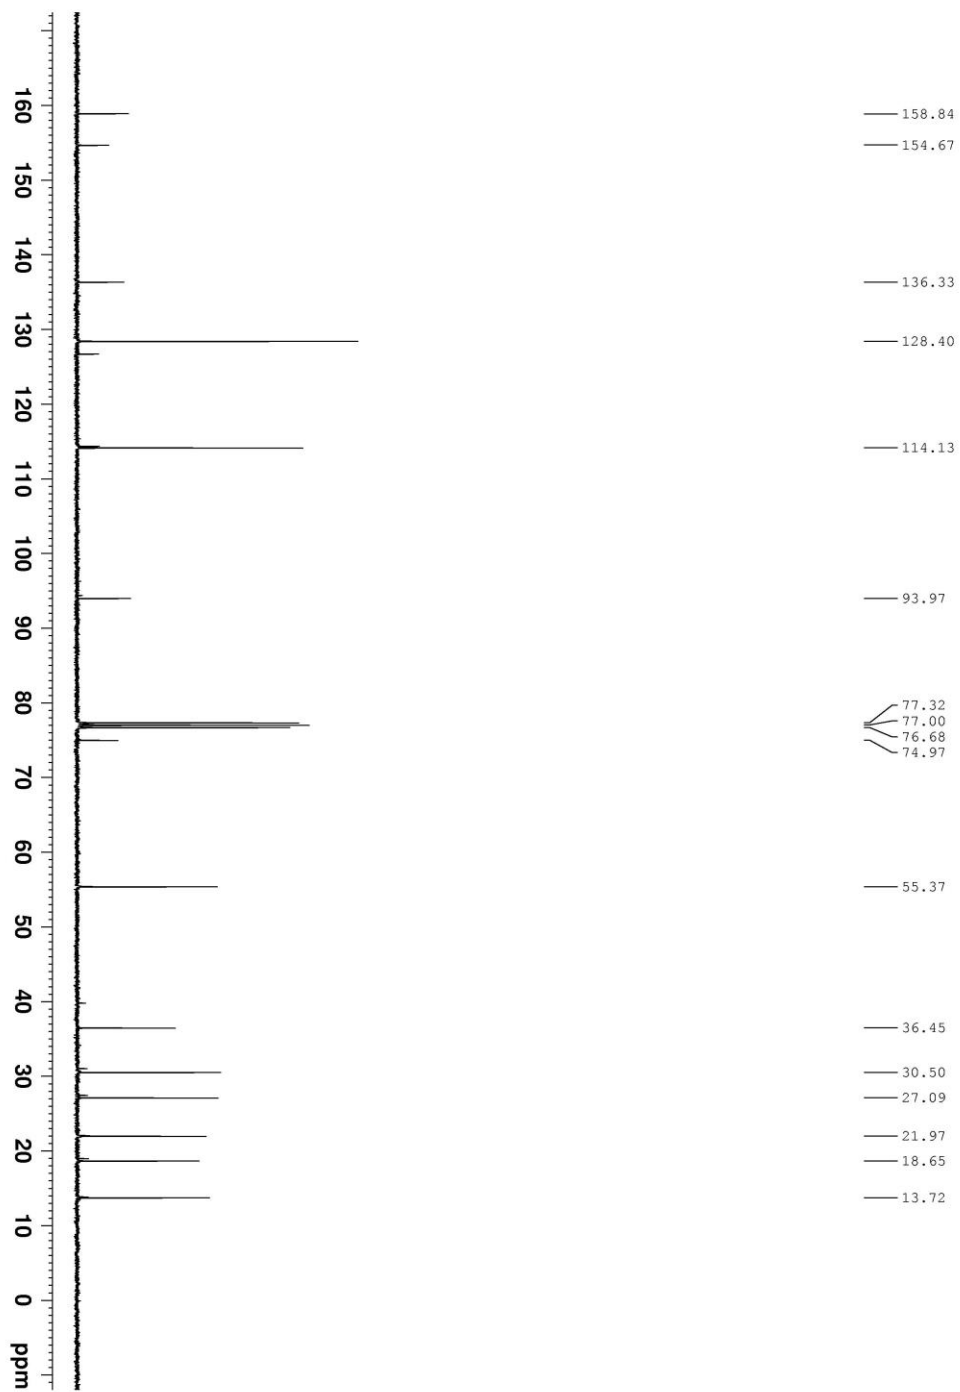

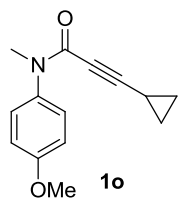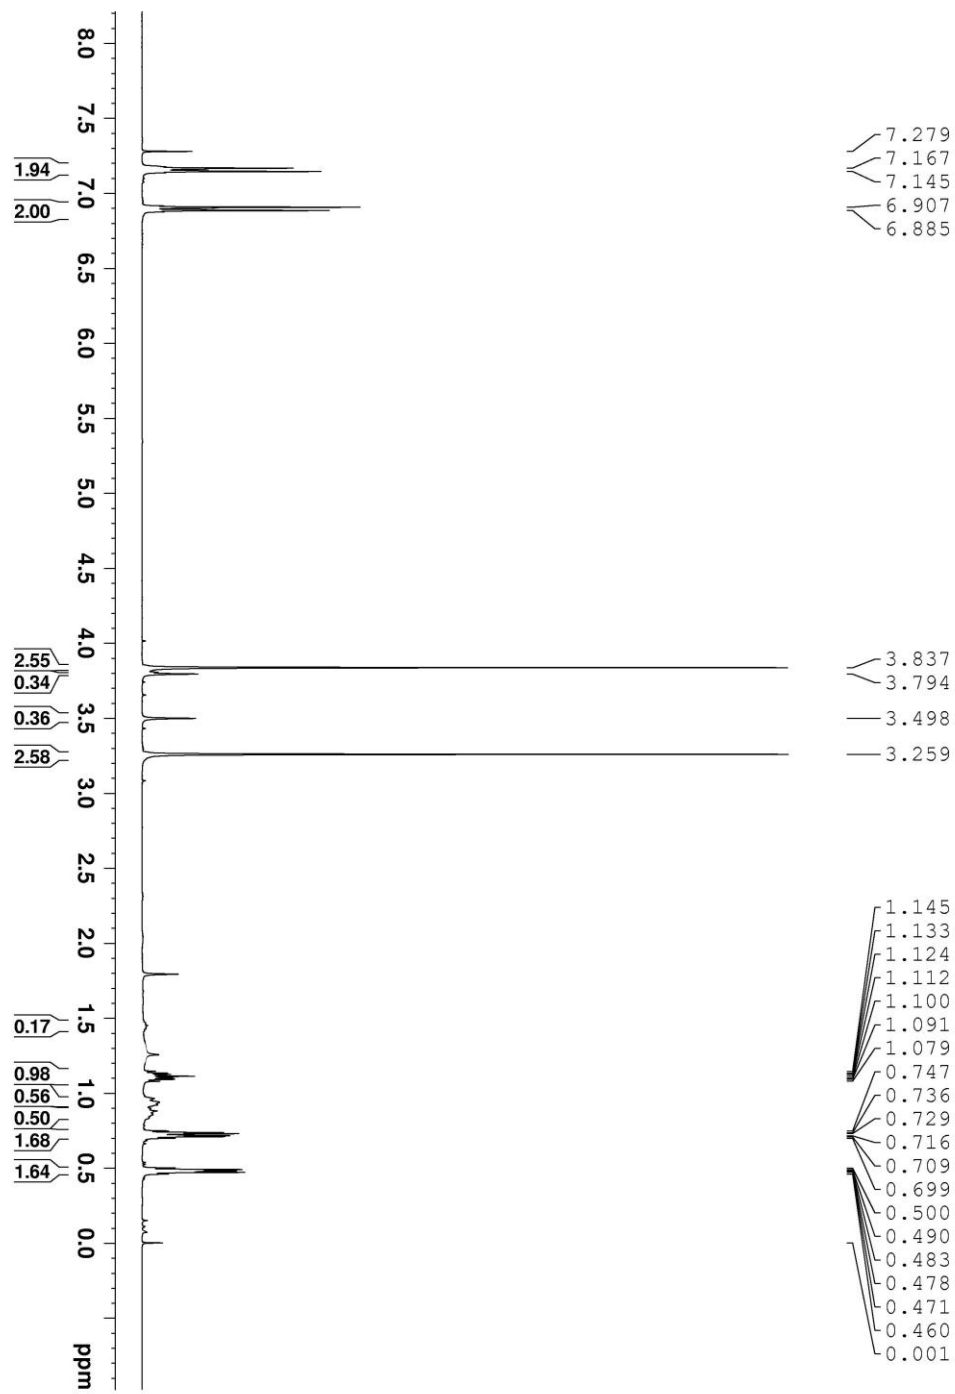

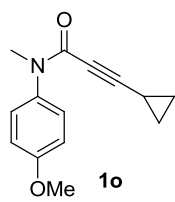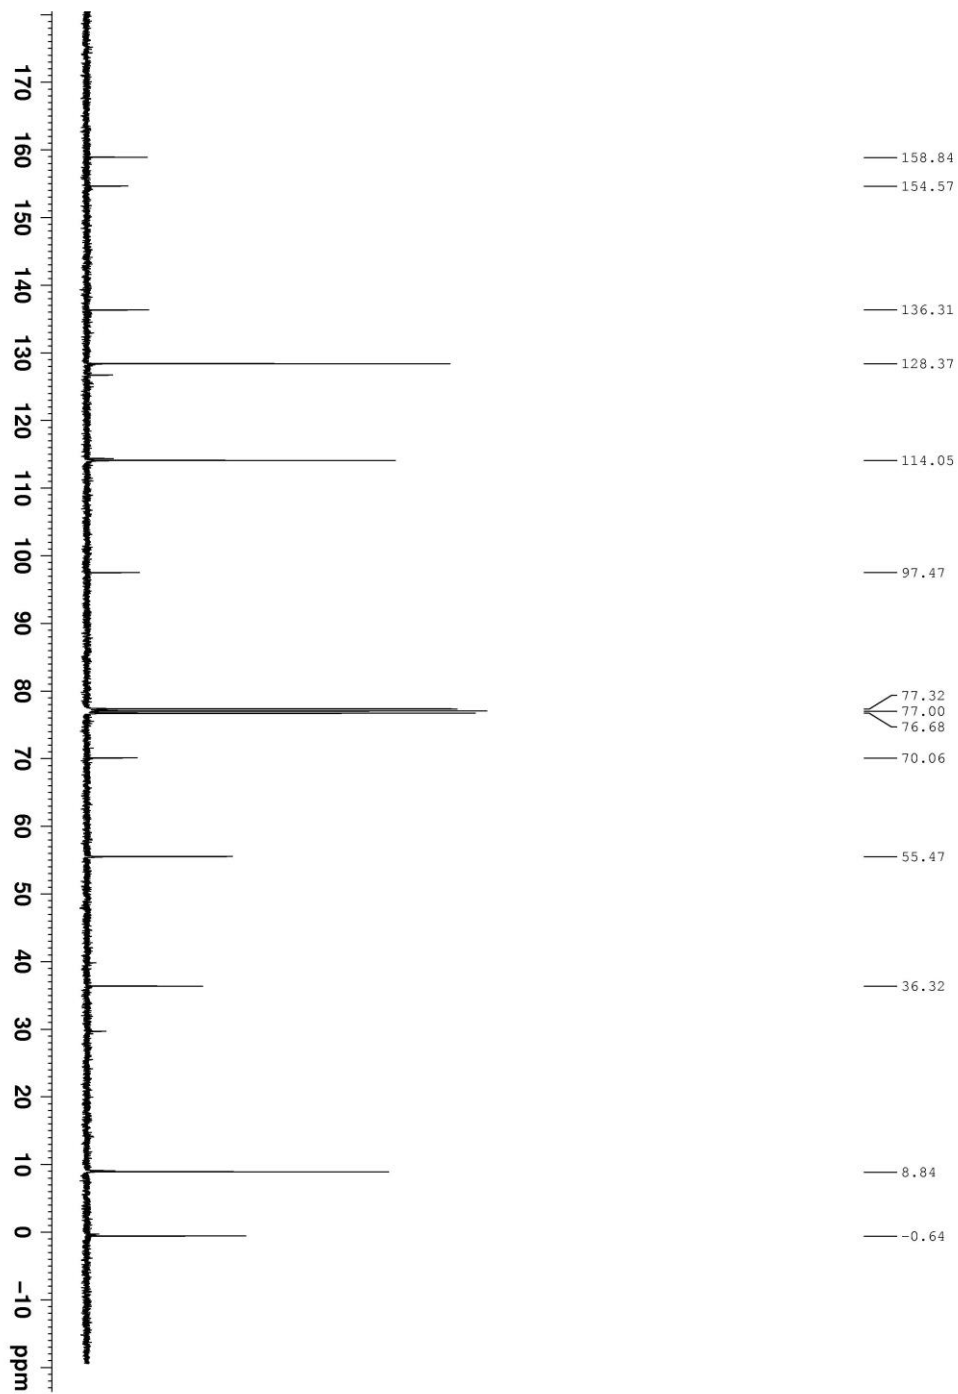



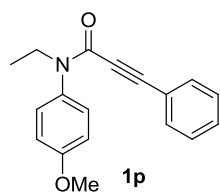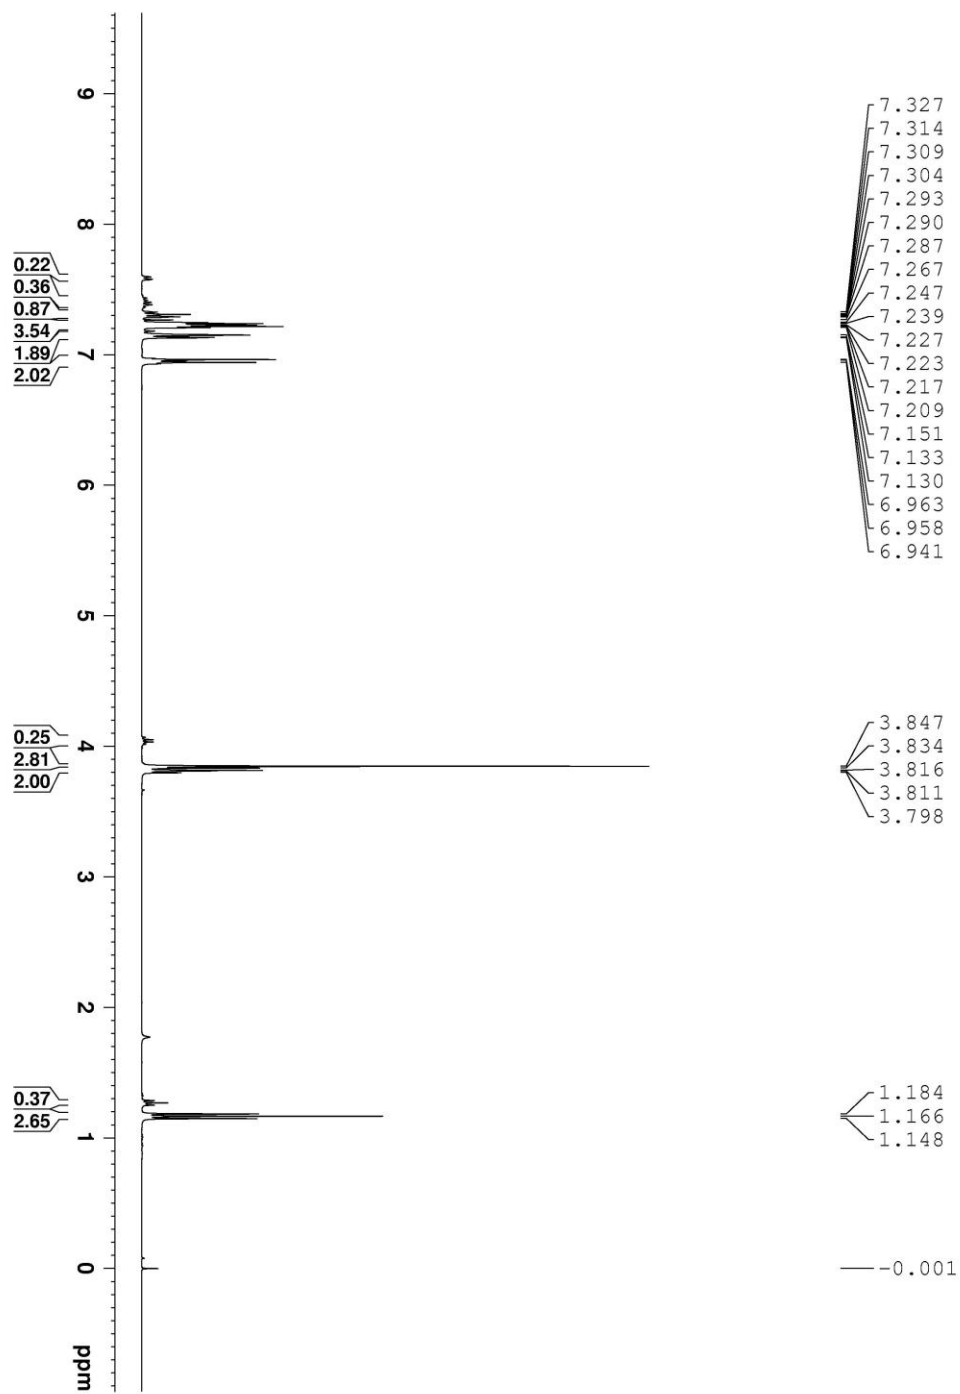

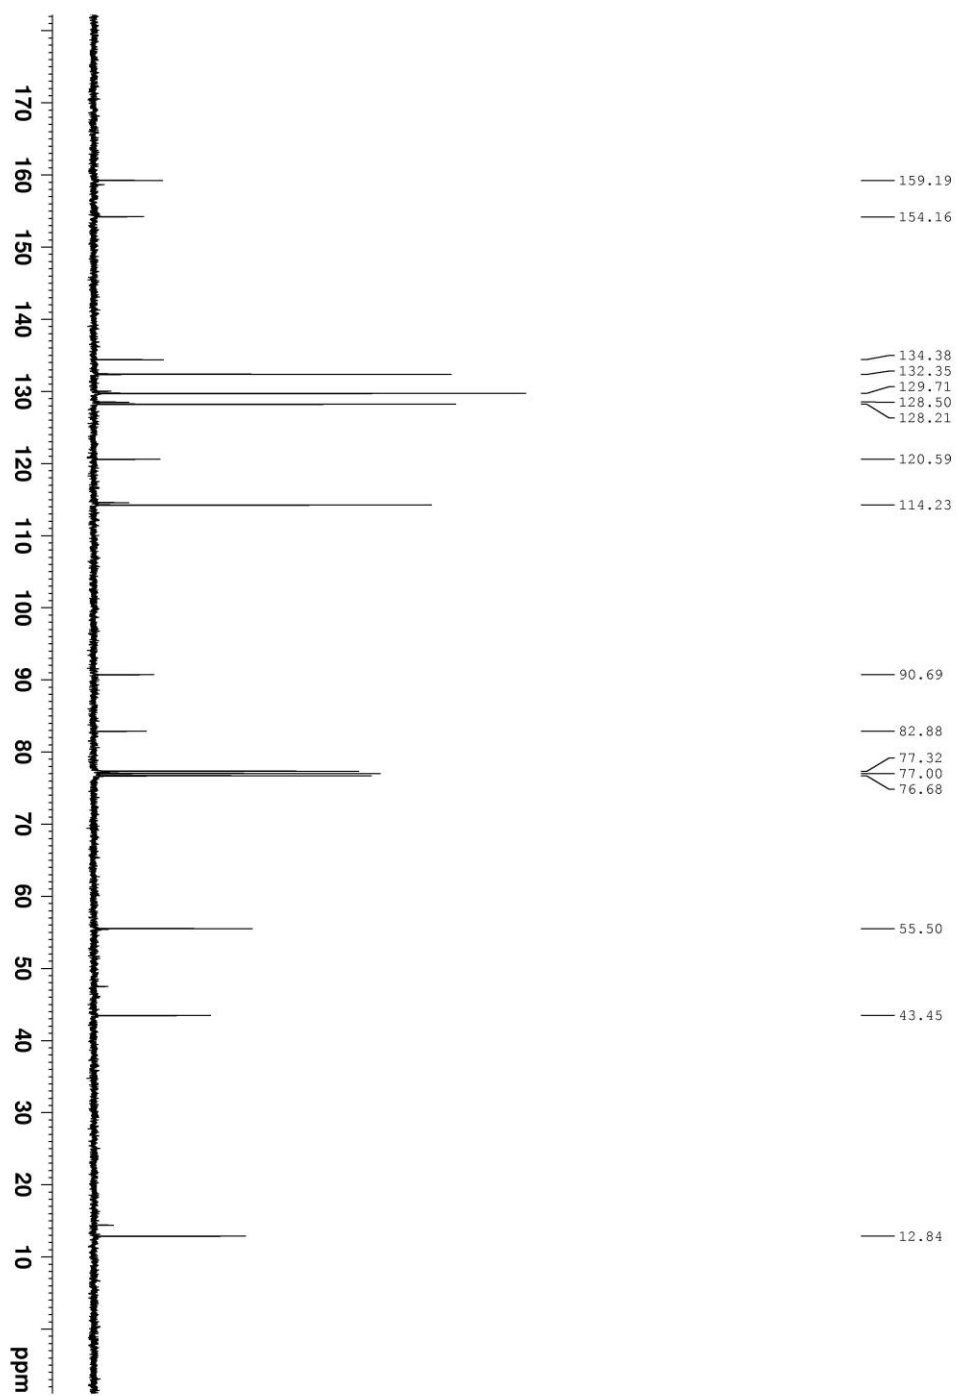

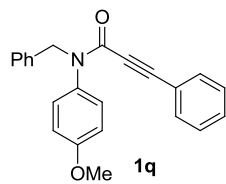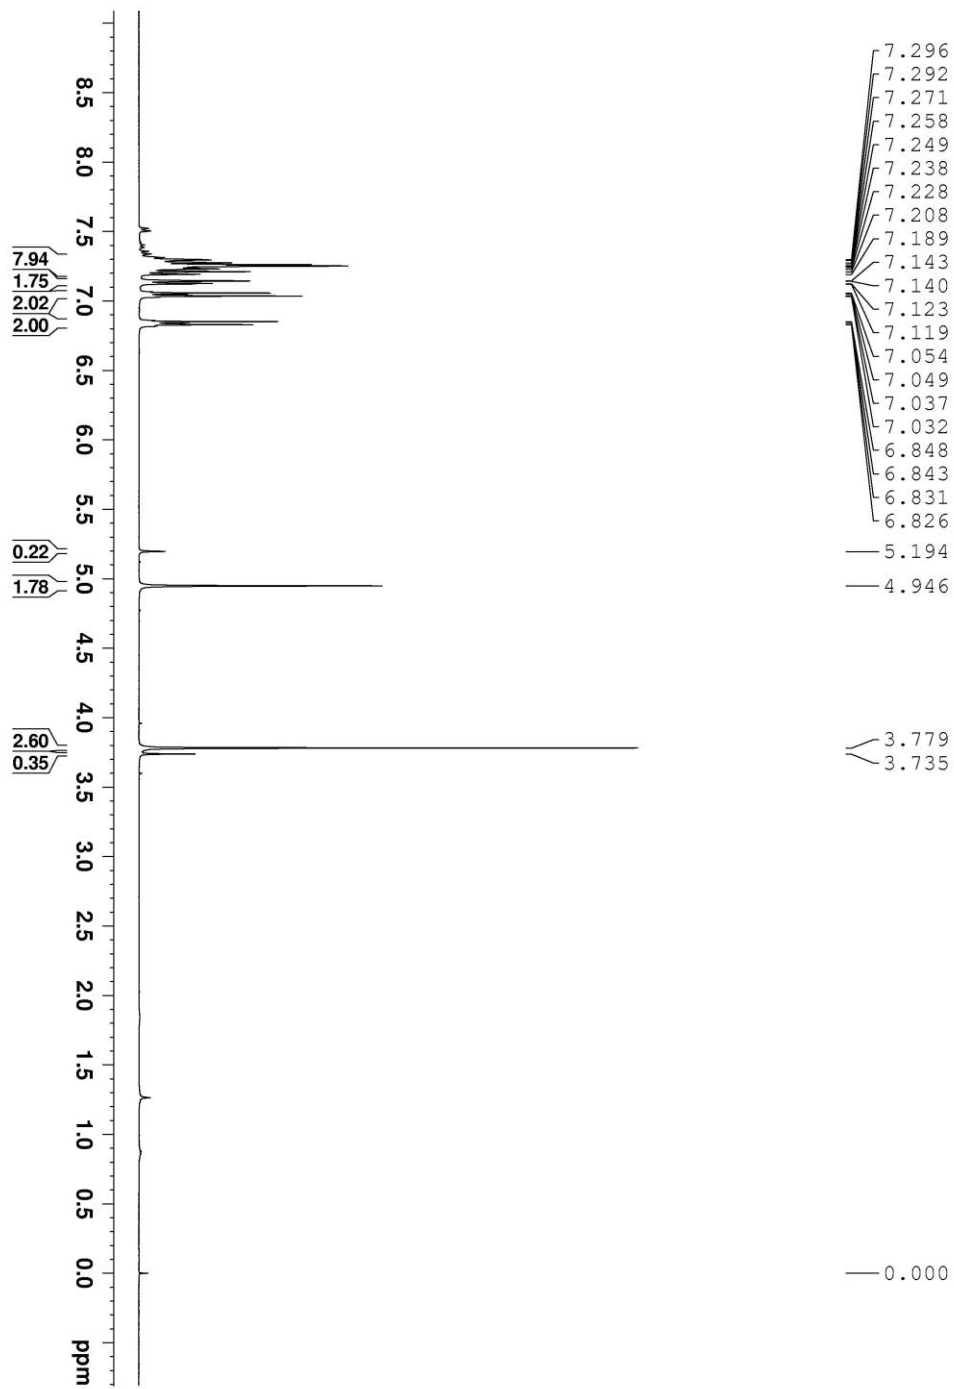

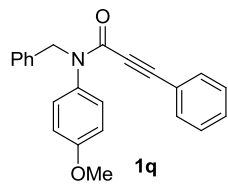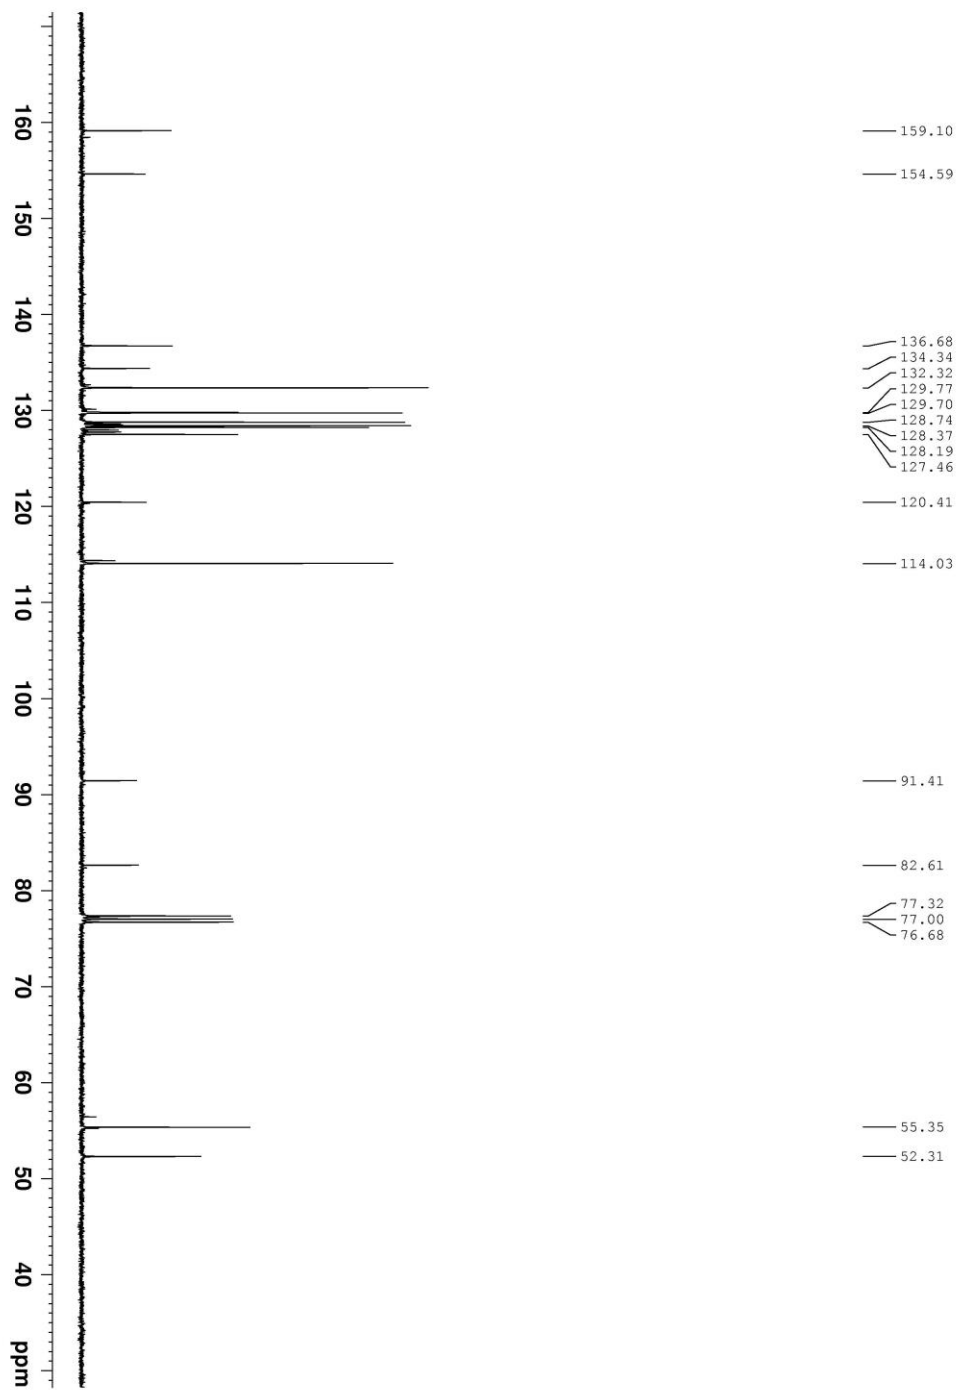

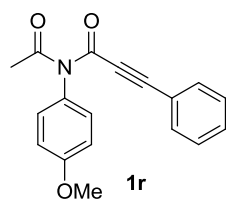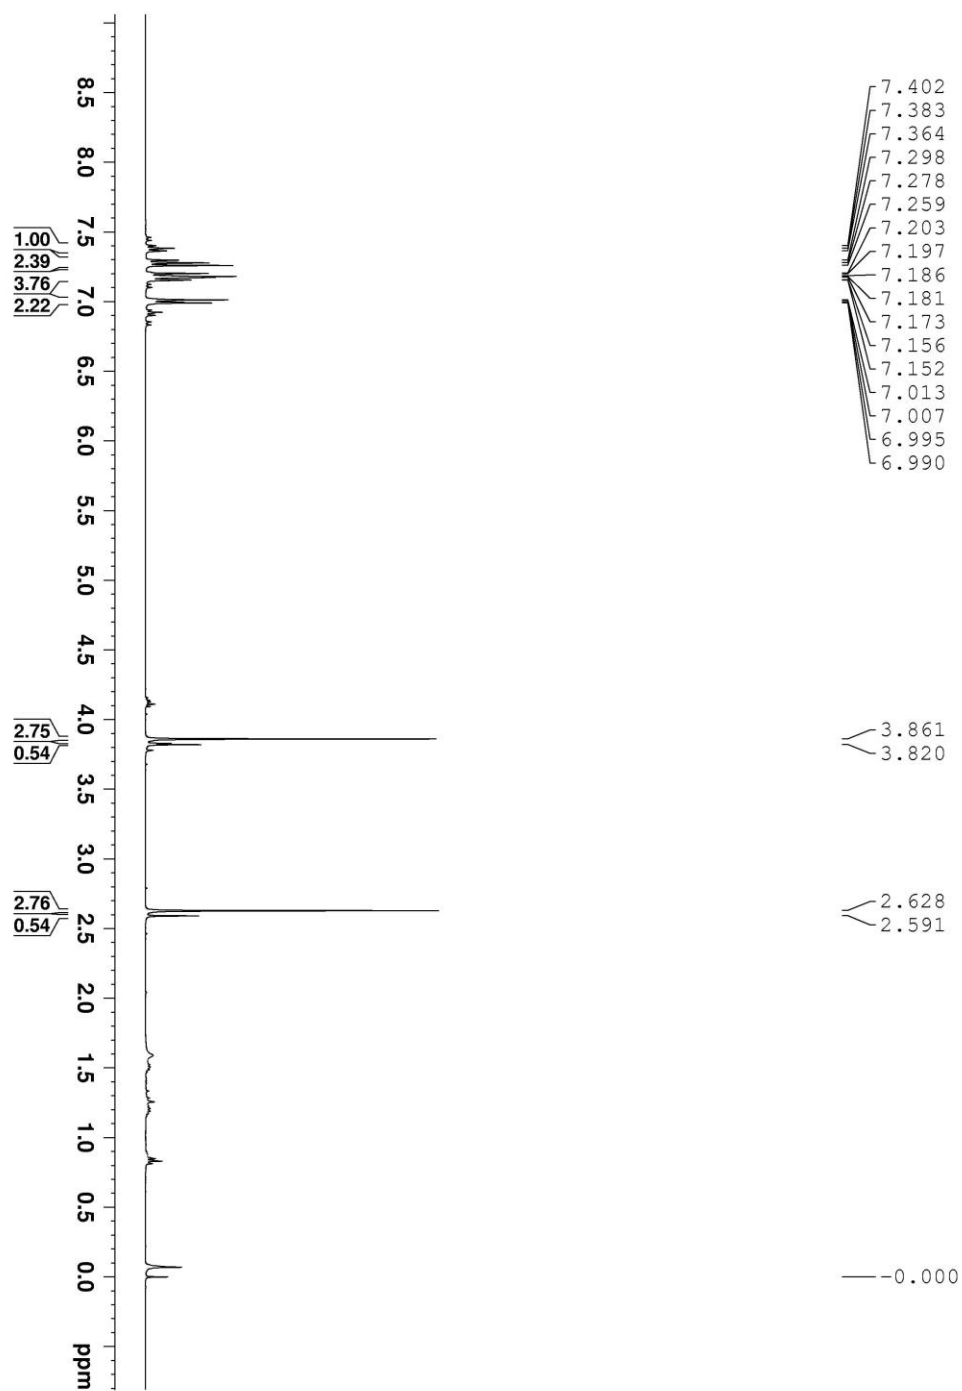

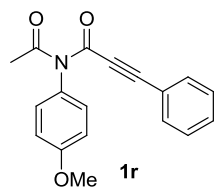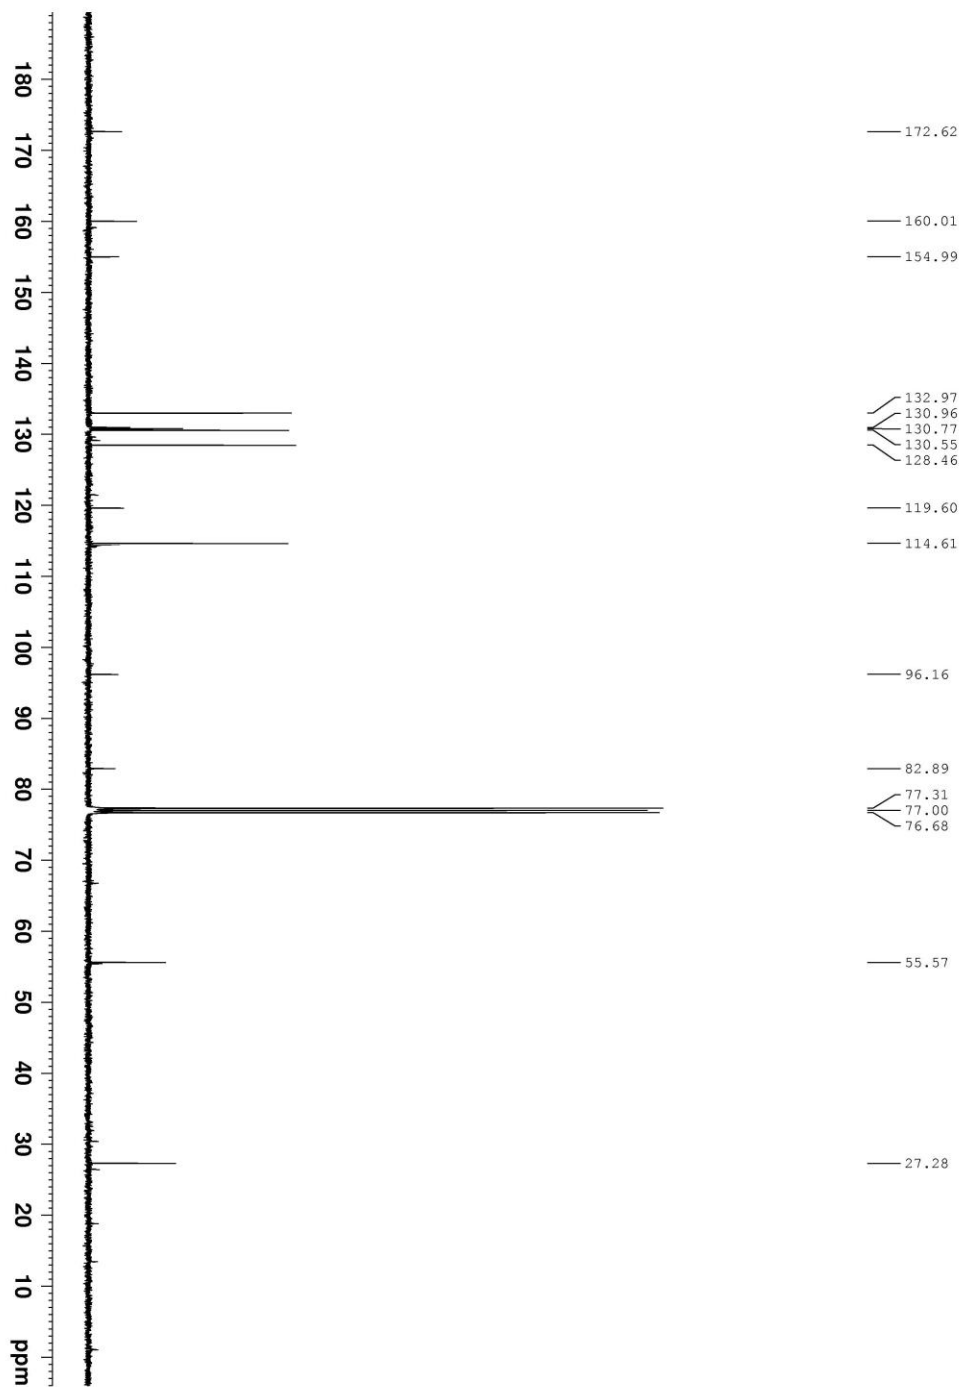

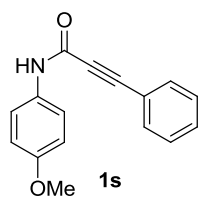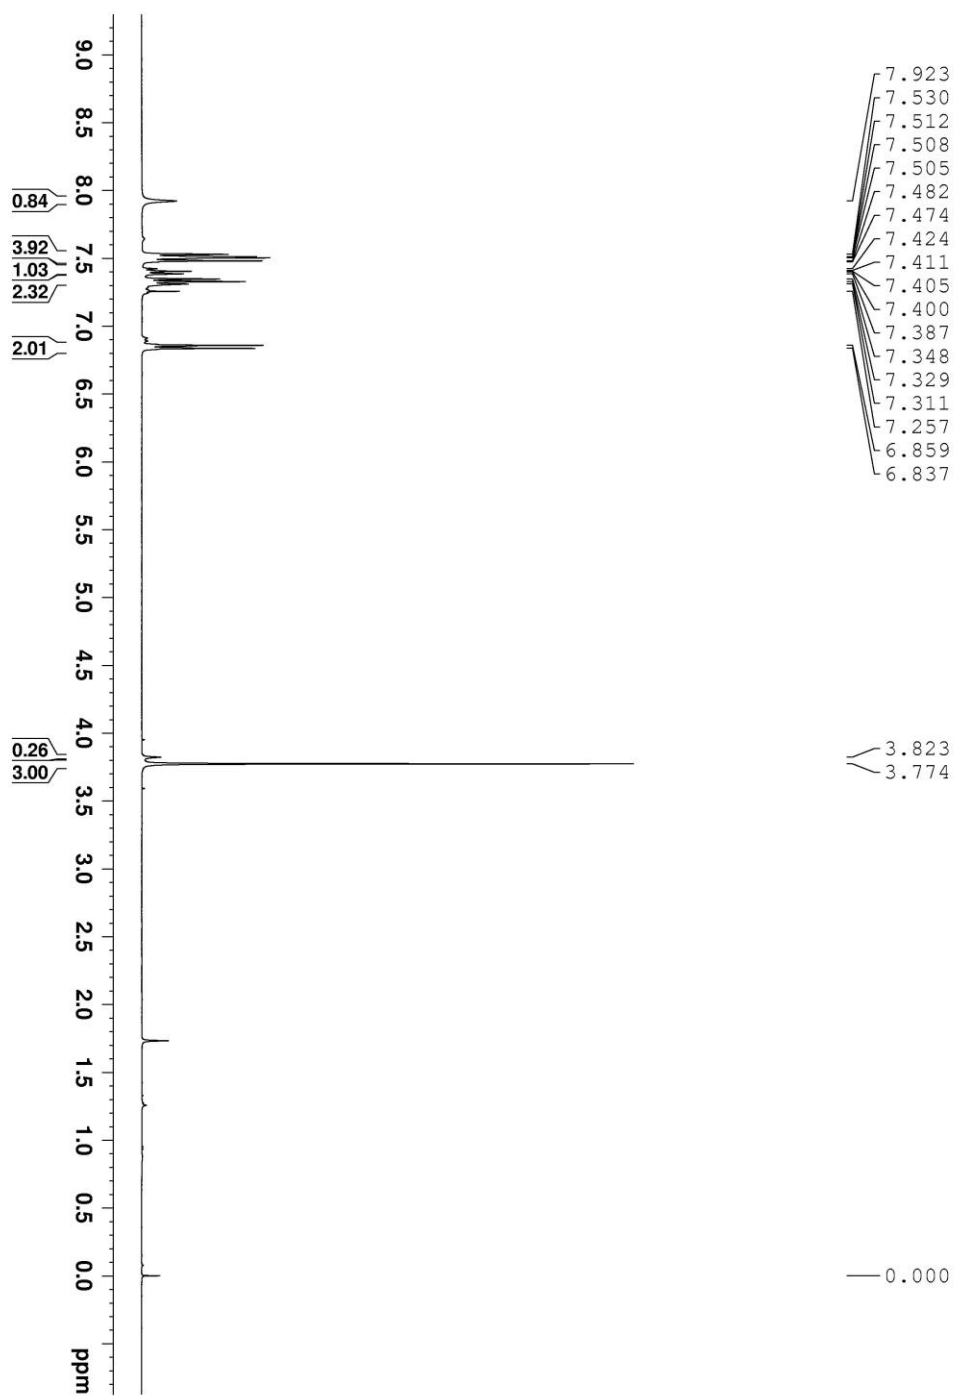

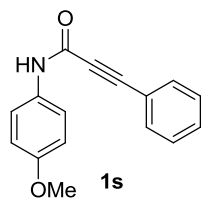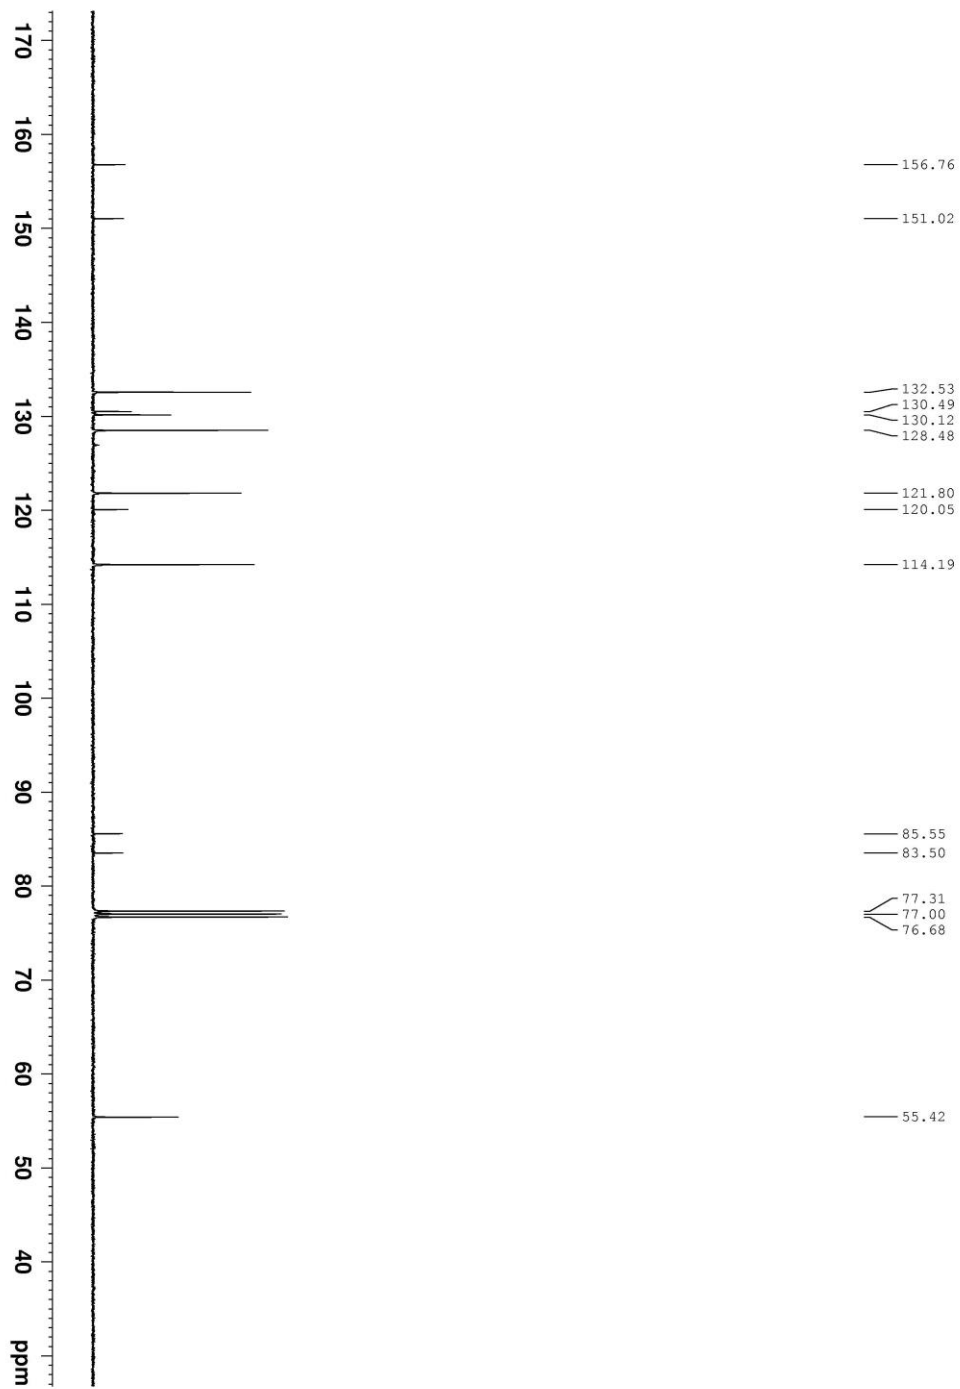



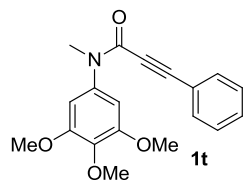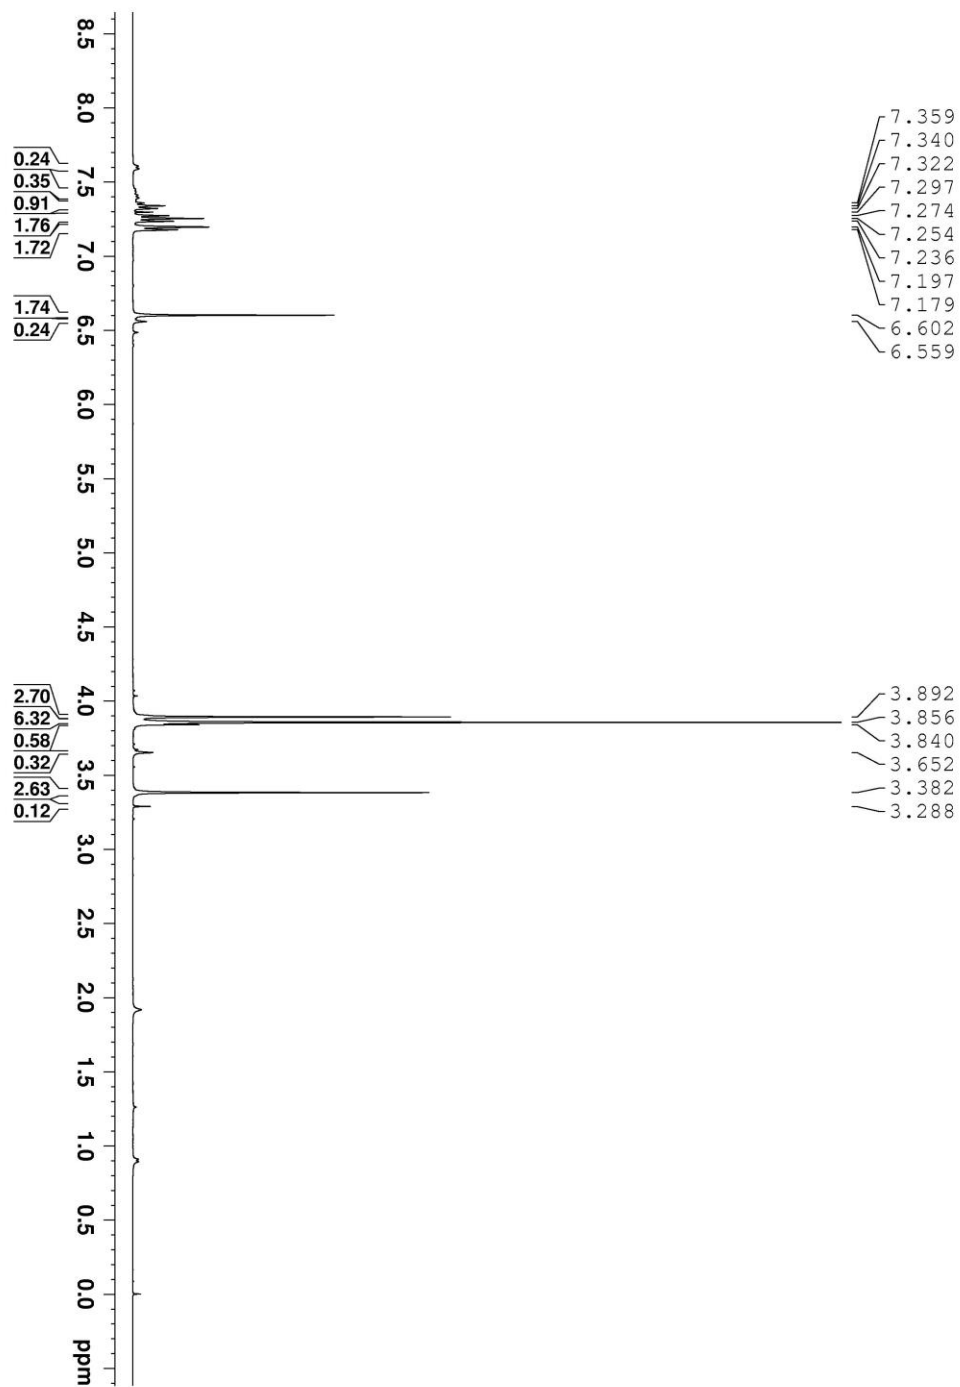

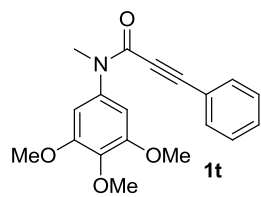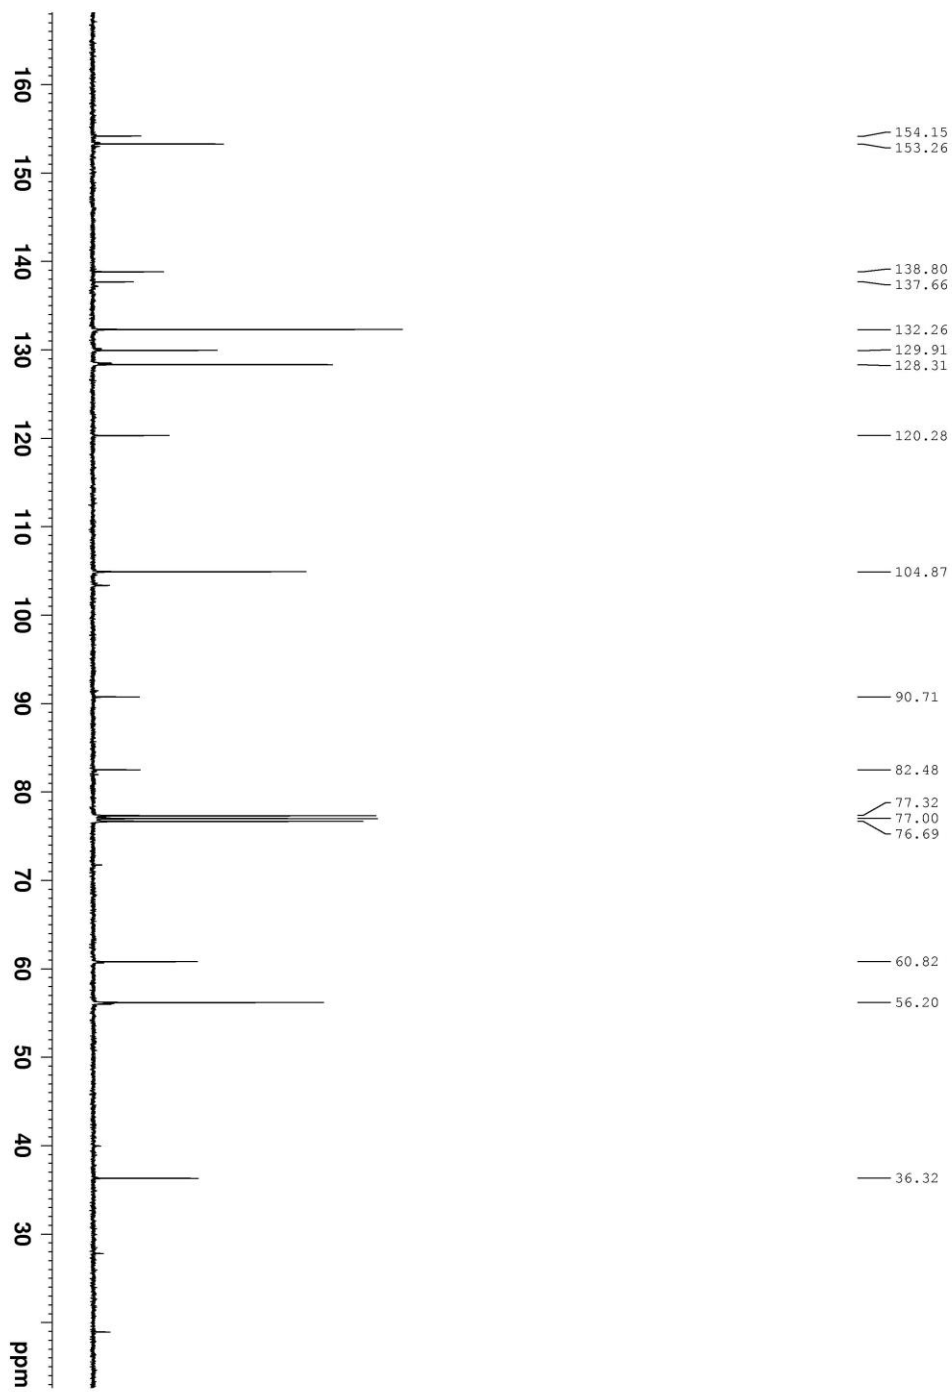

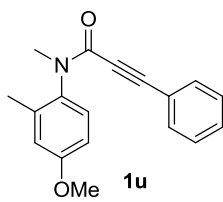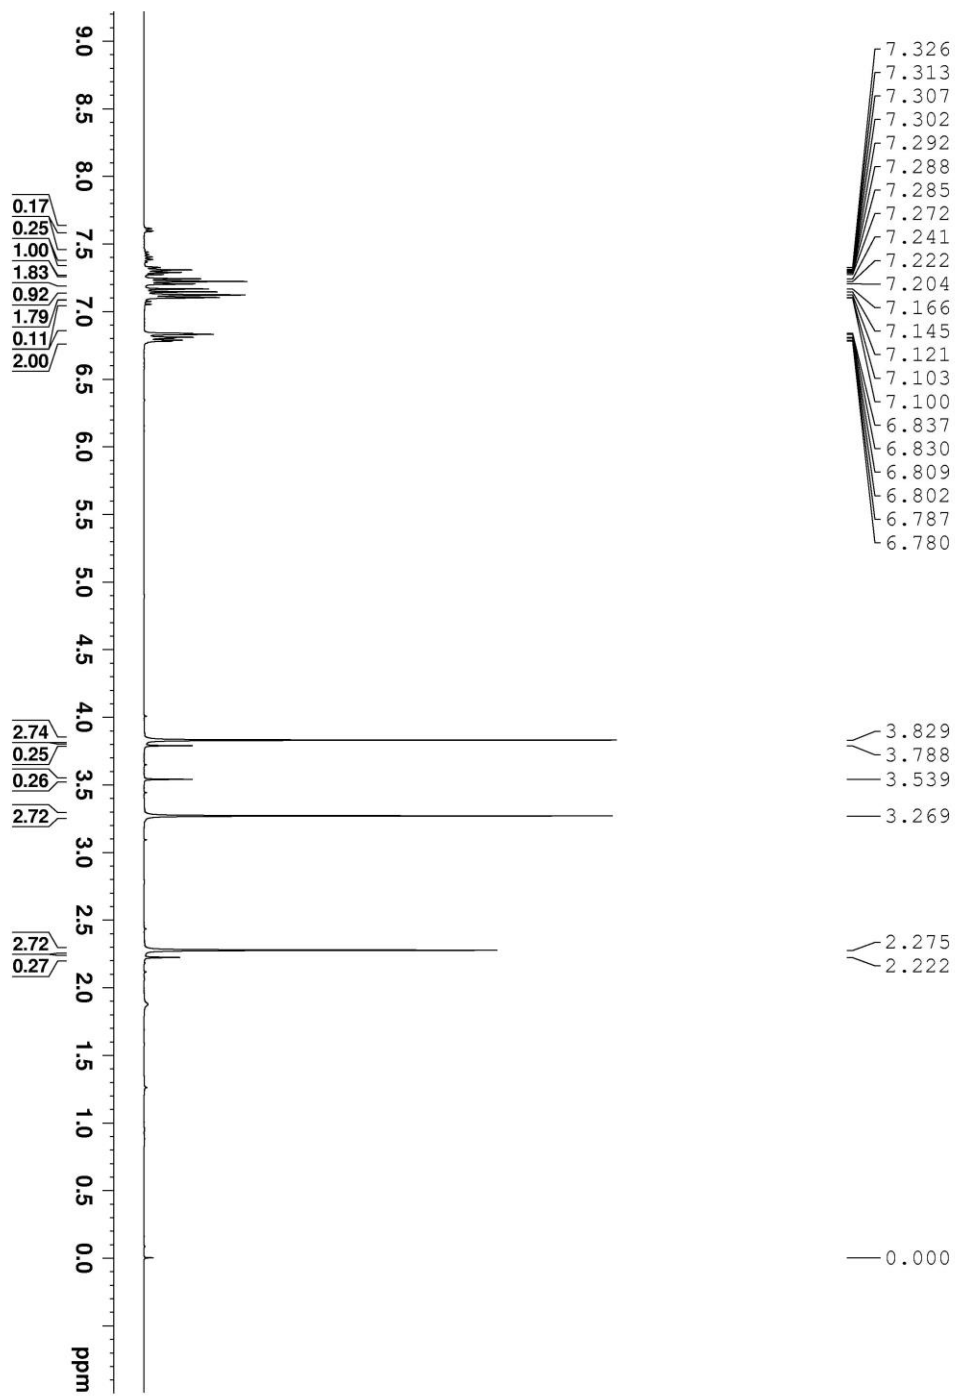

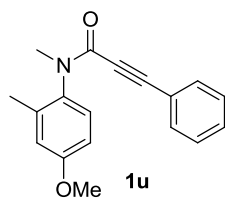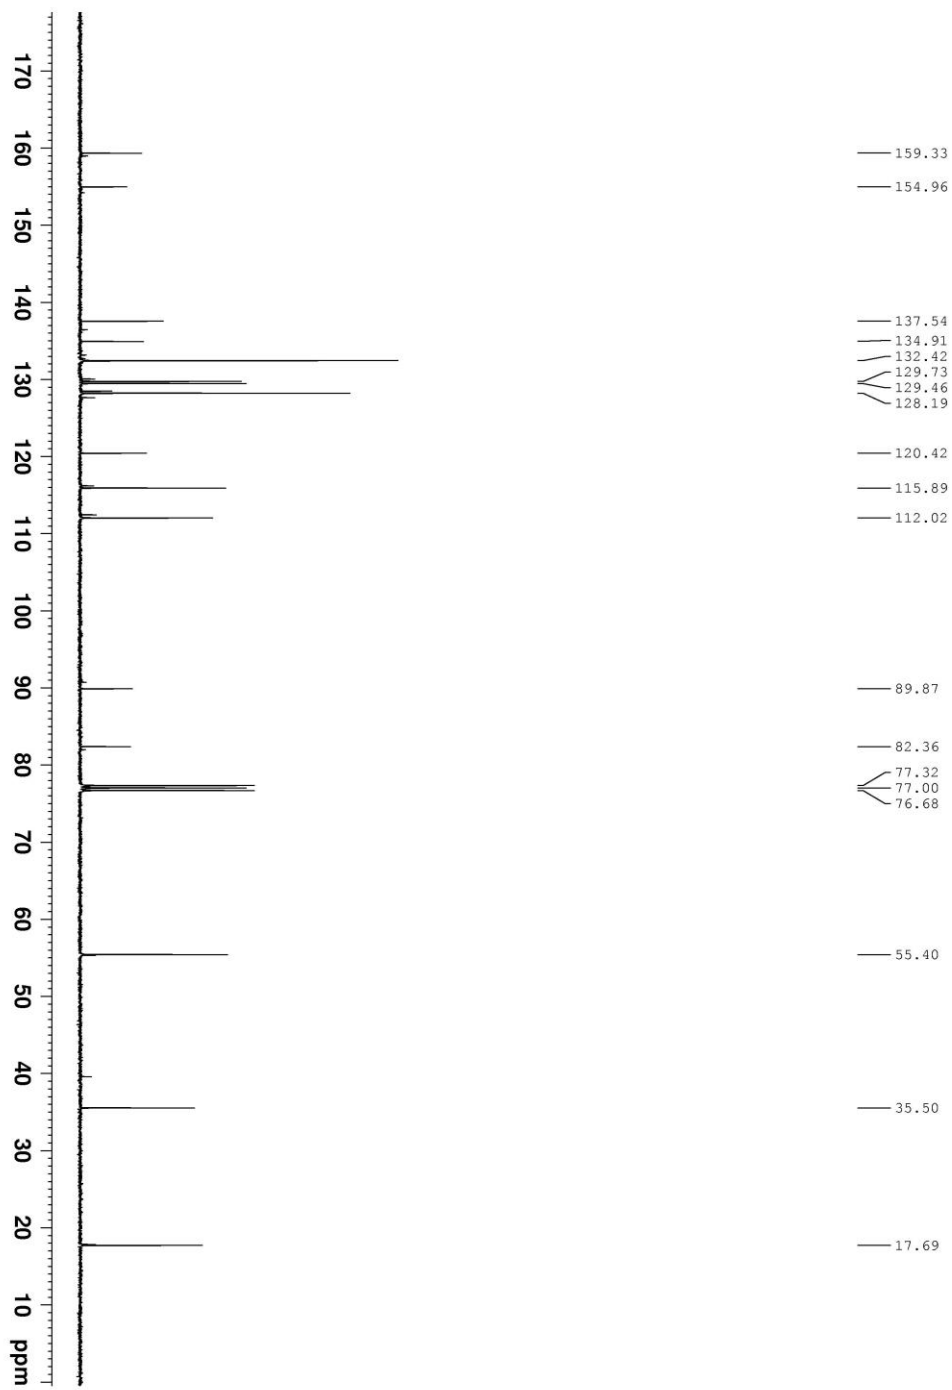

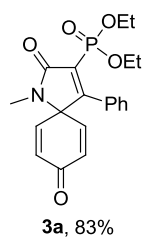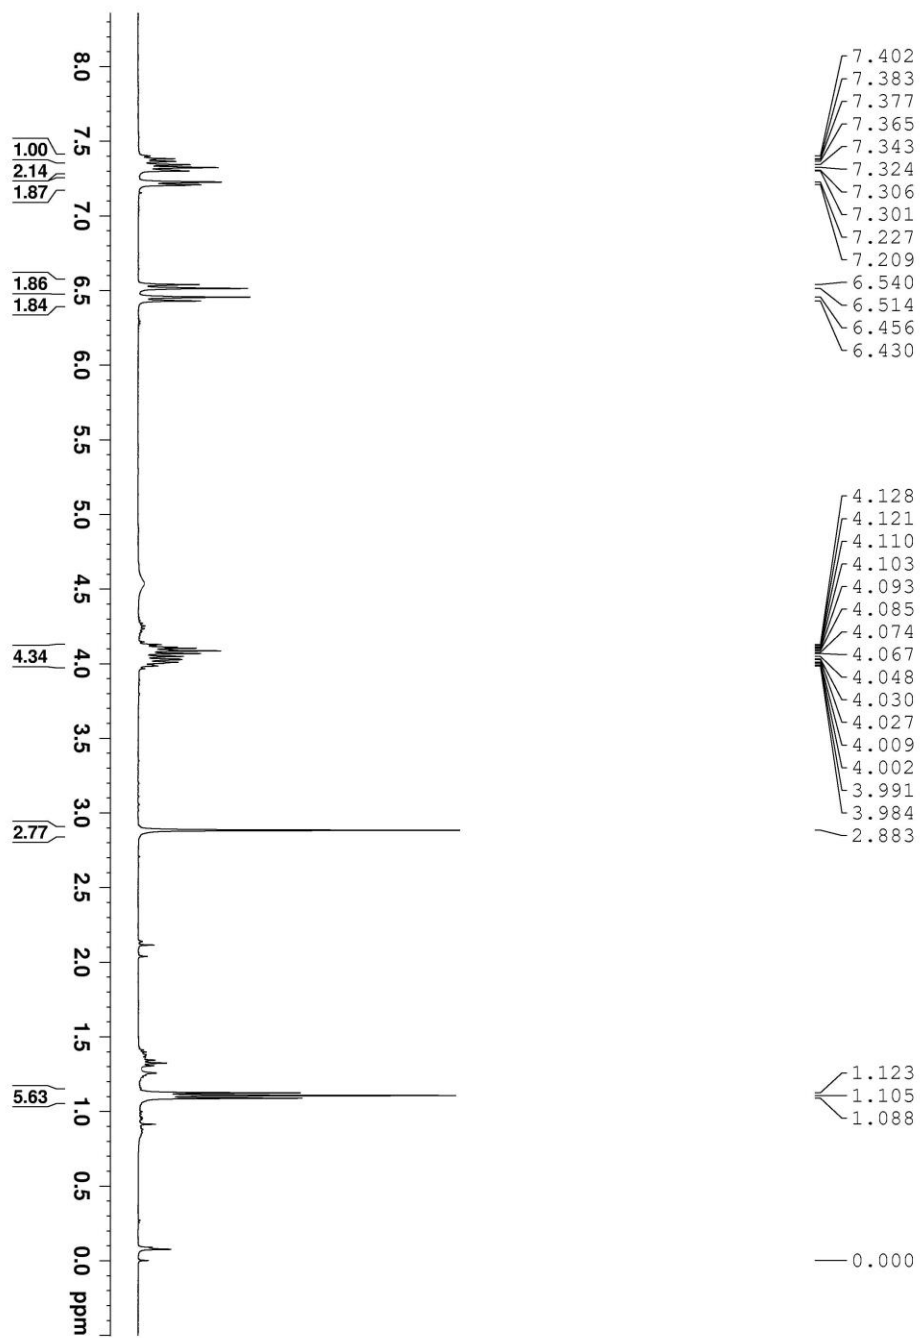

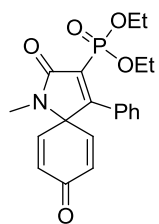

**3a**, 83%

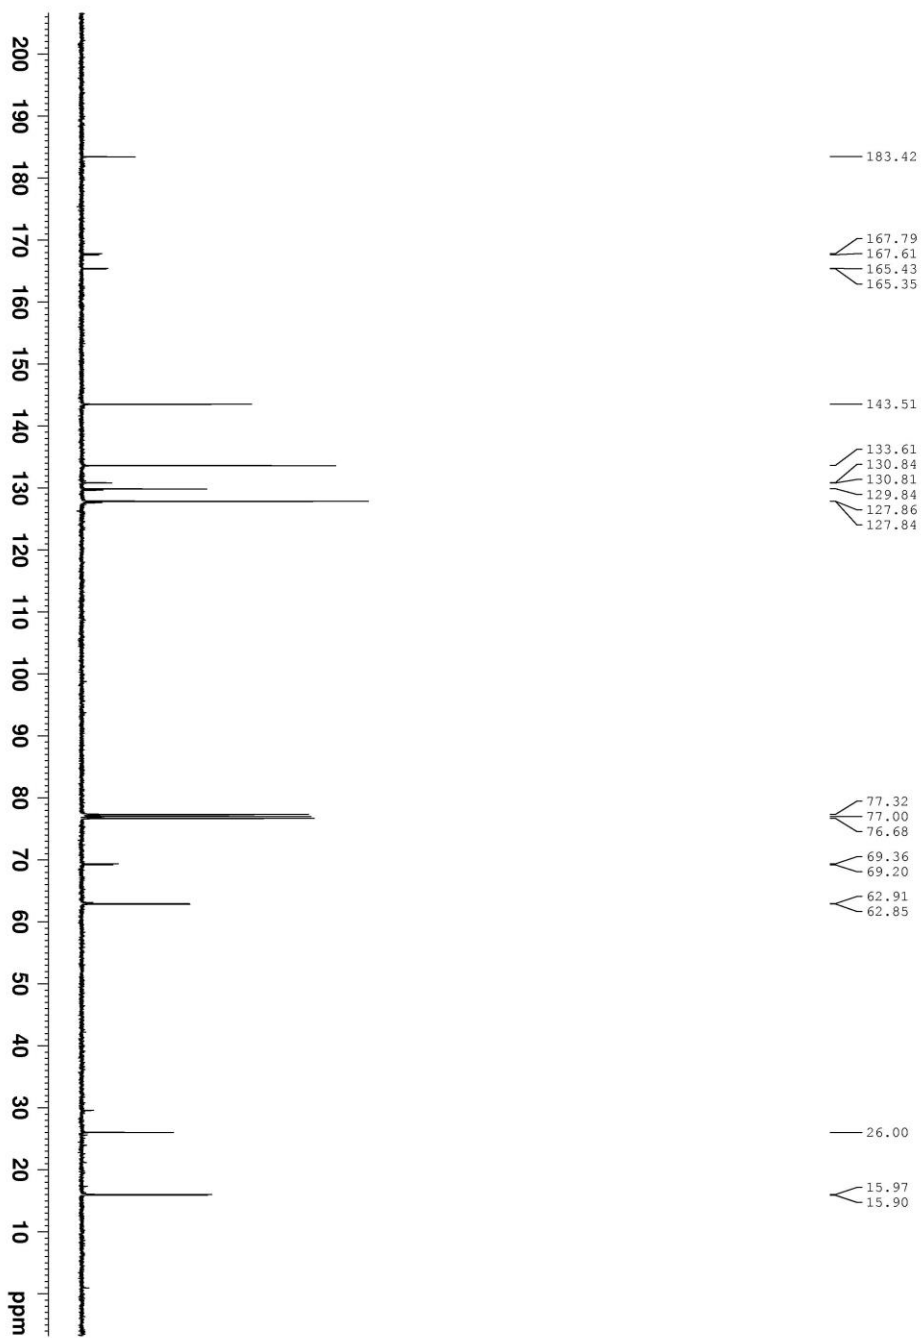

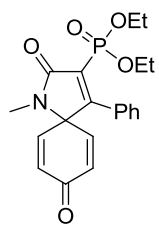

**3a**, 83%

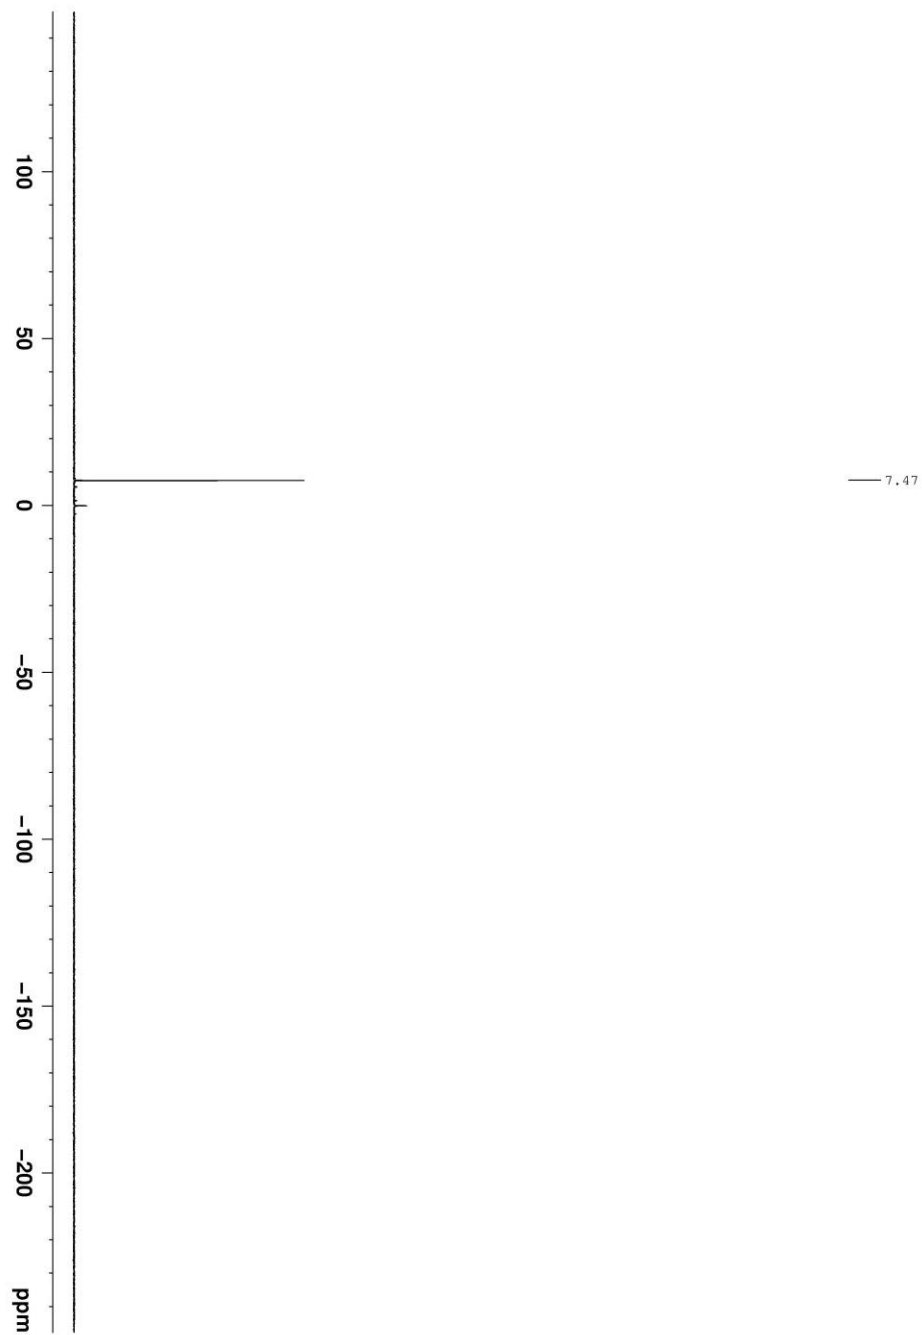

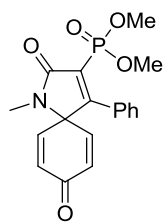

**3b**, 66%

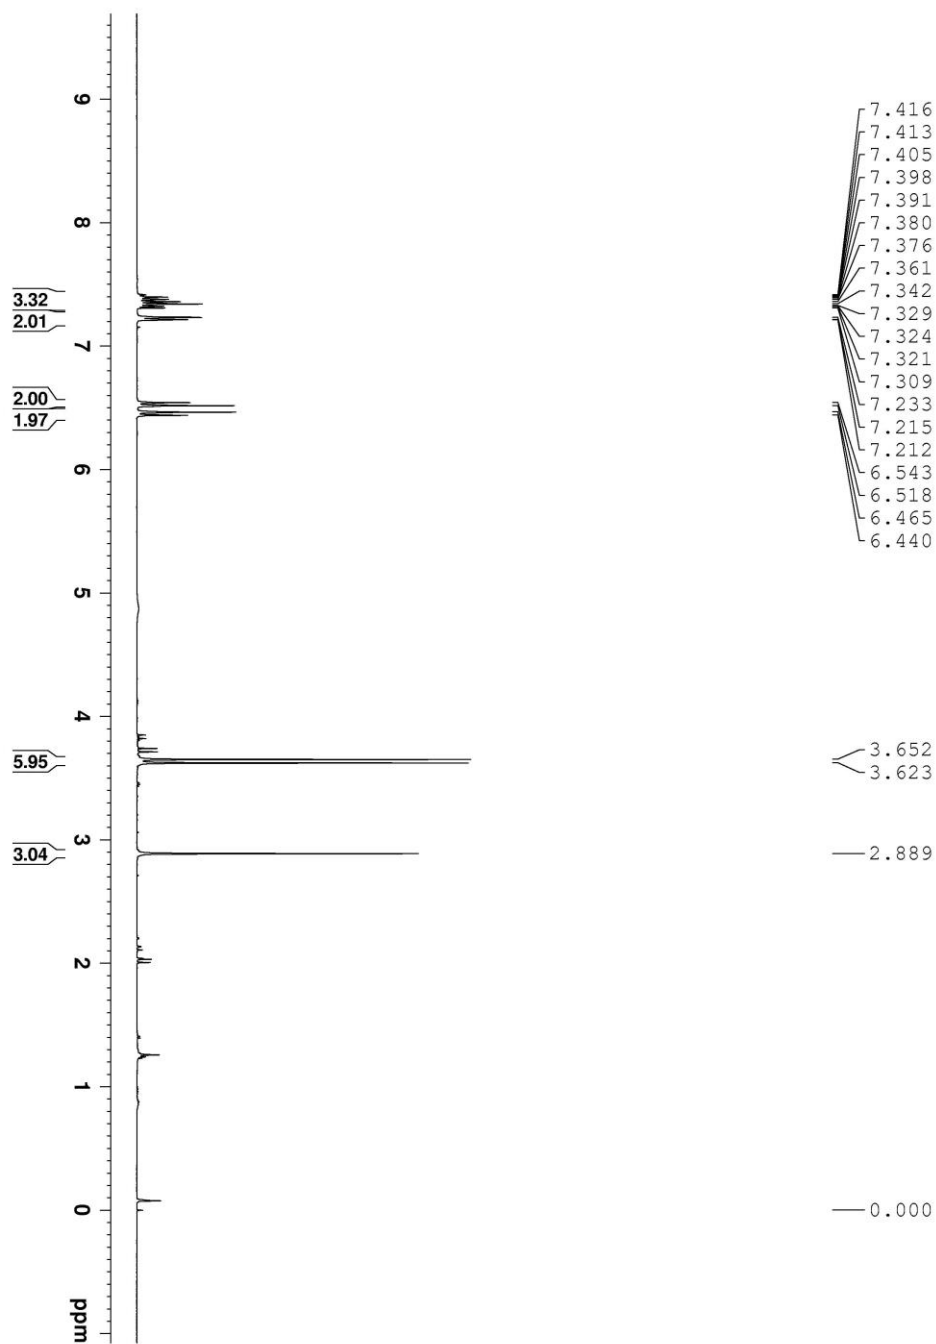



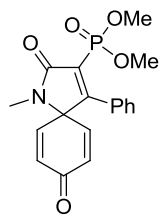

**3b**, 66%

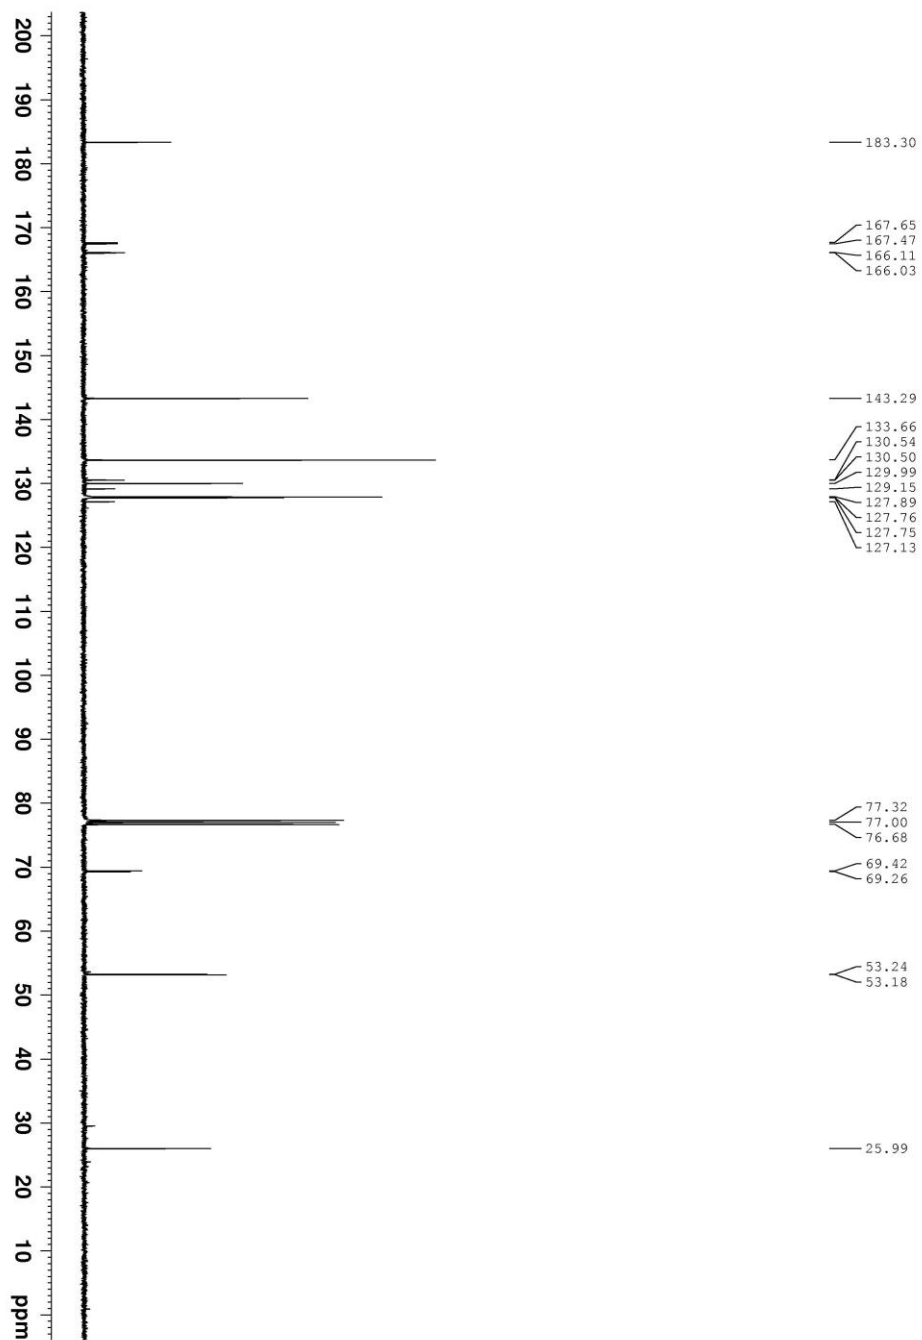

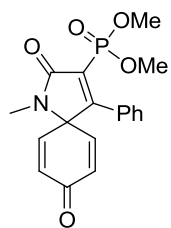

**3b**, 66%

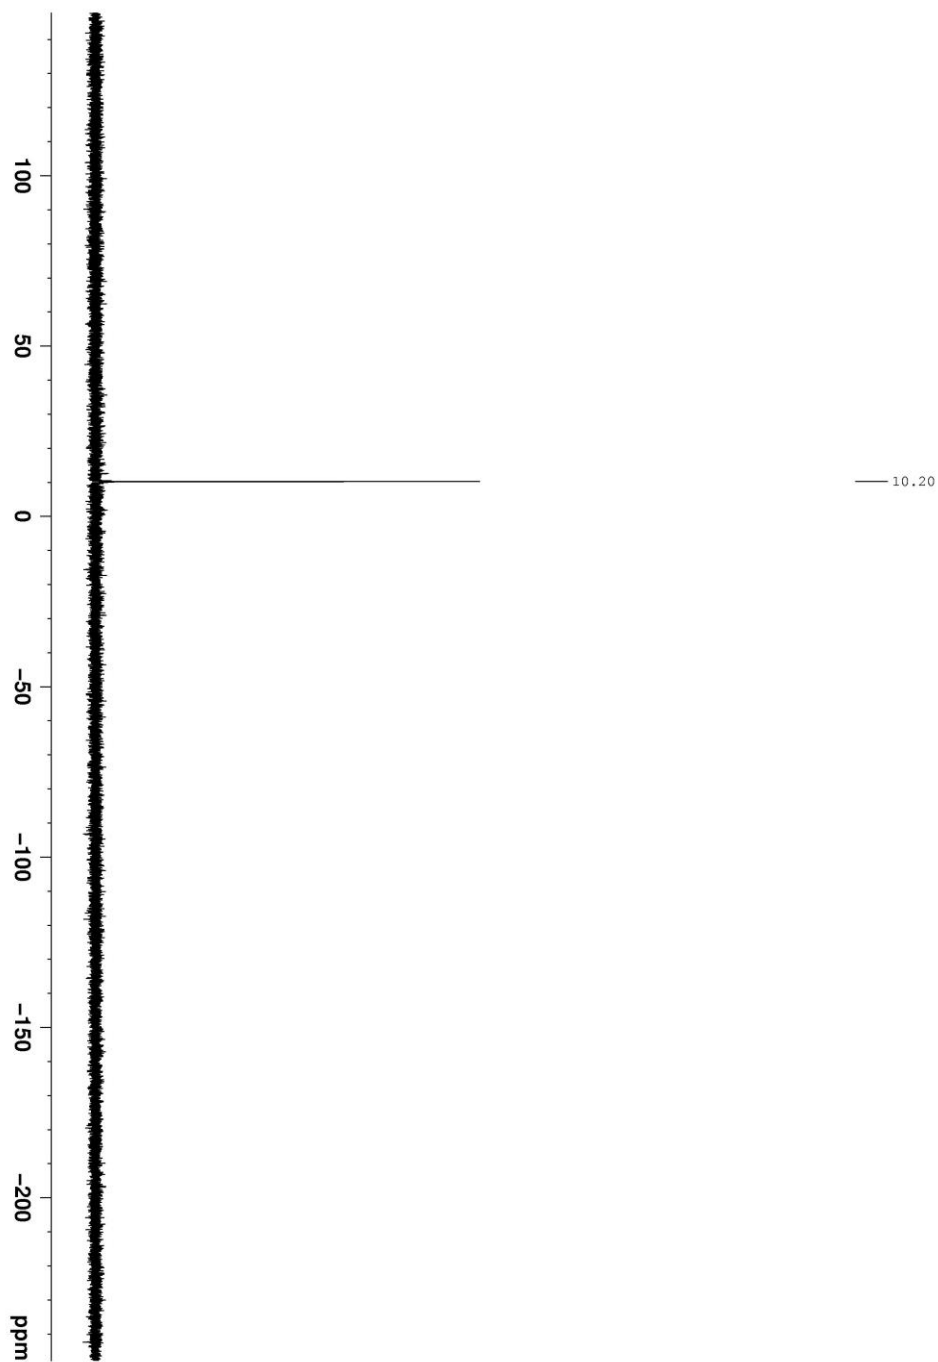

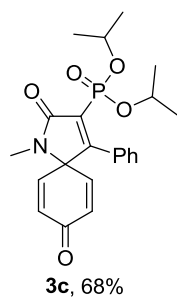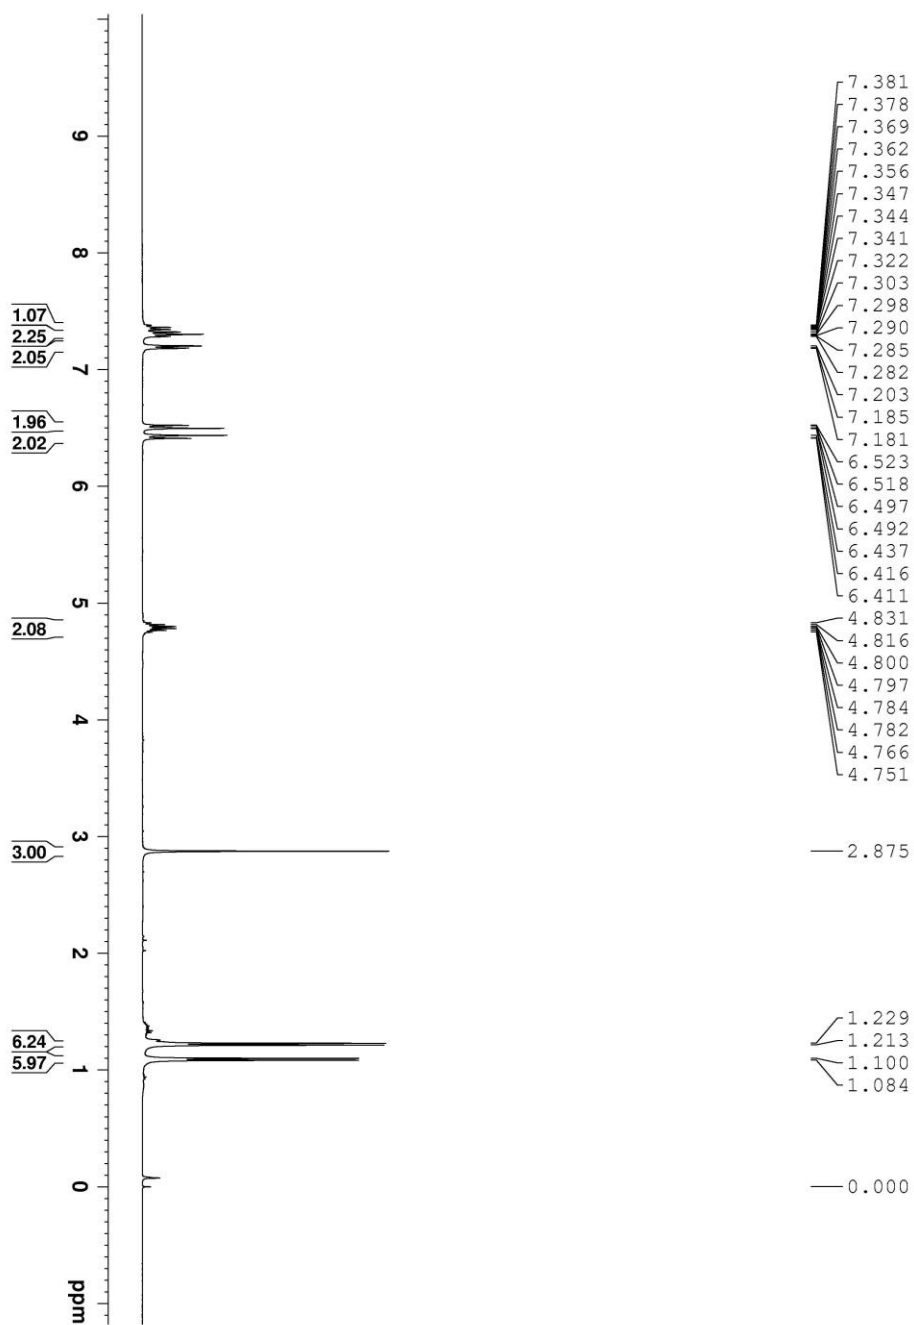

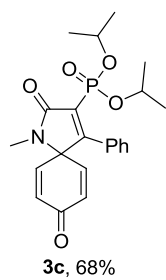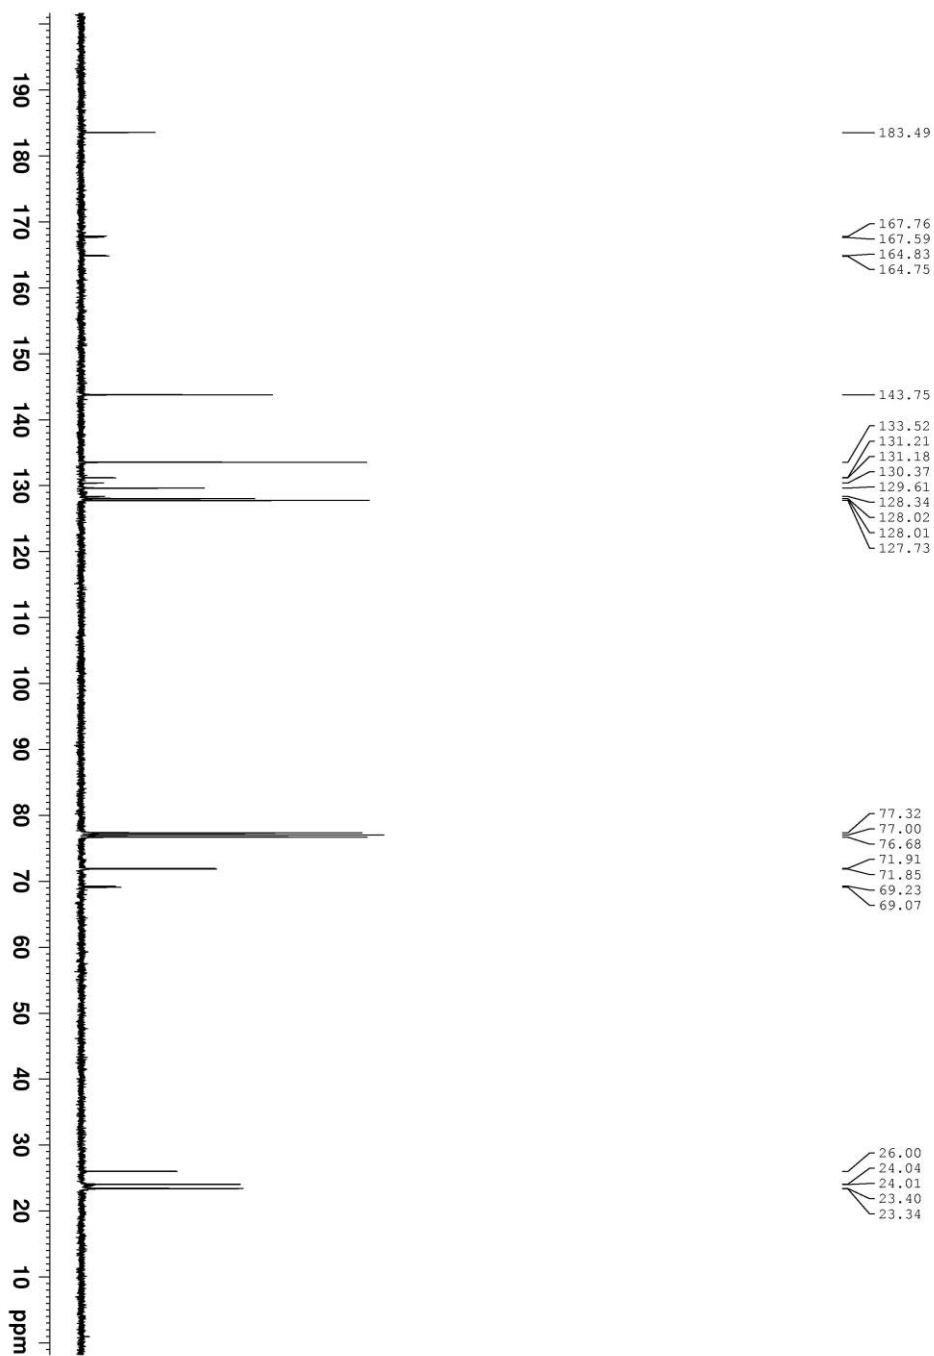

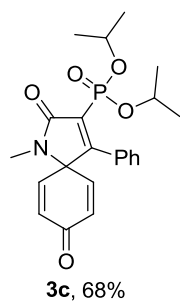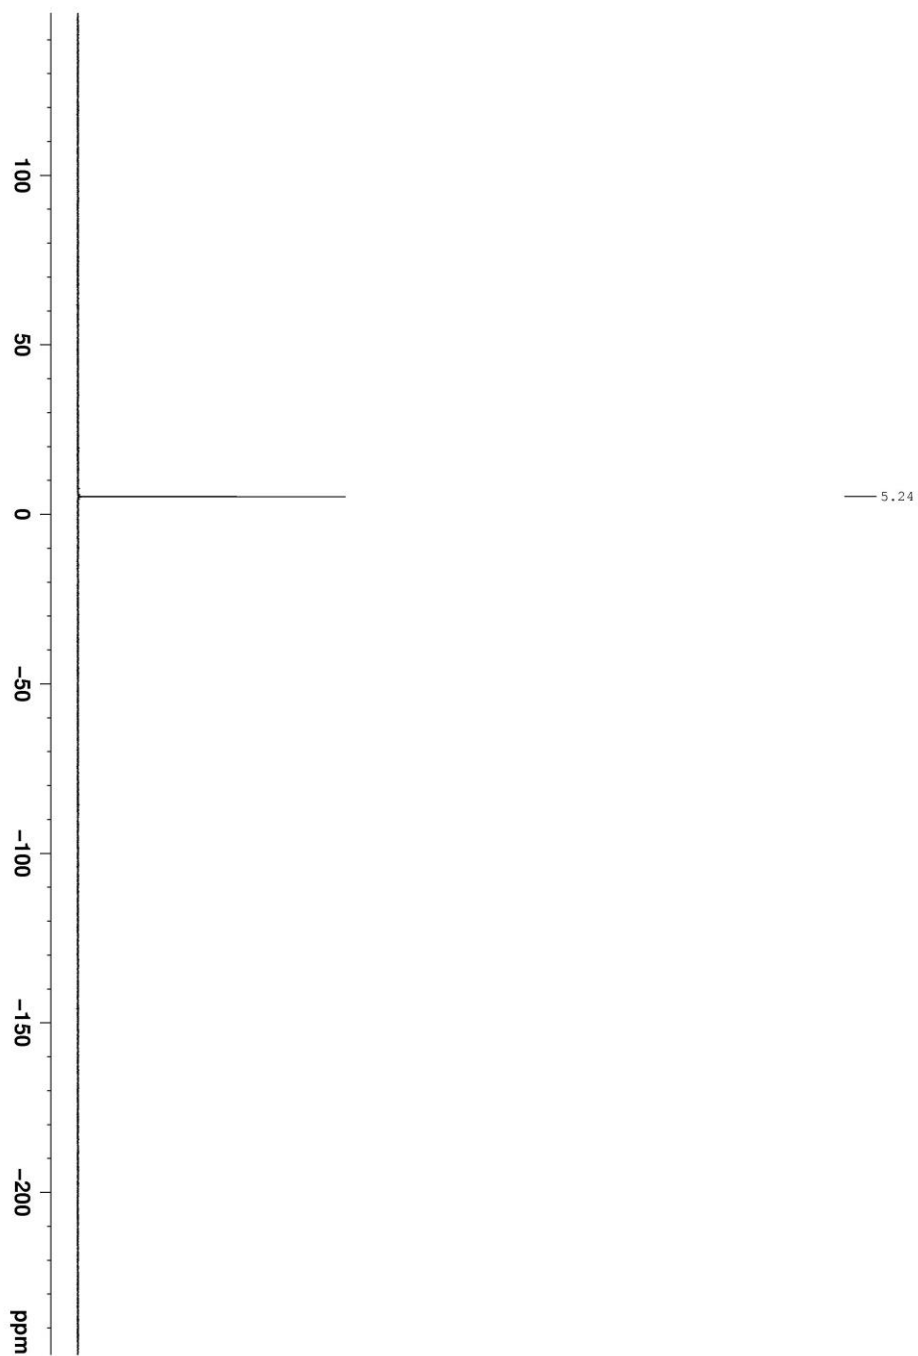

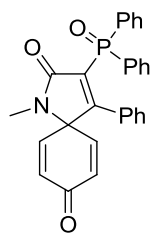

**3d**, 71%

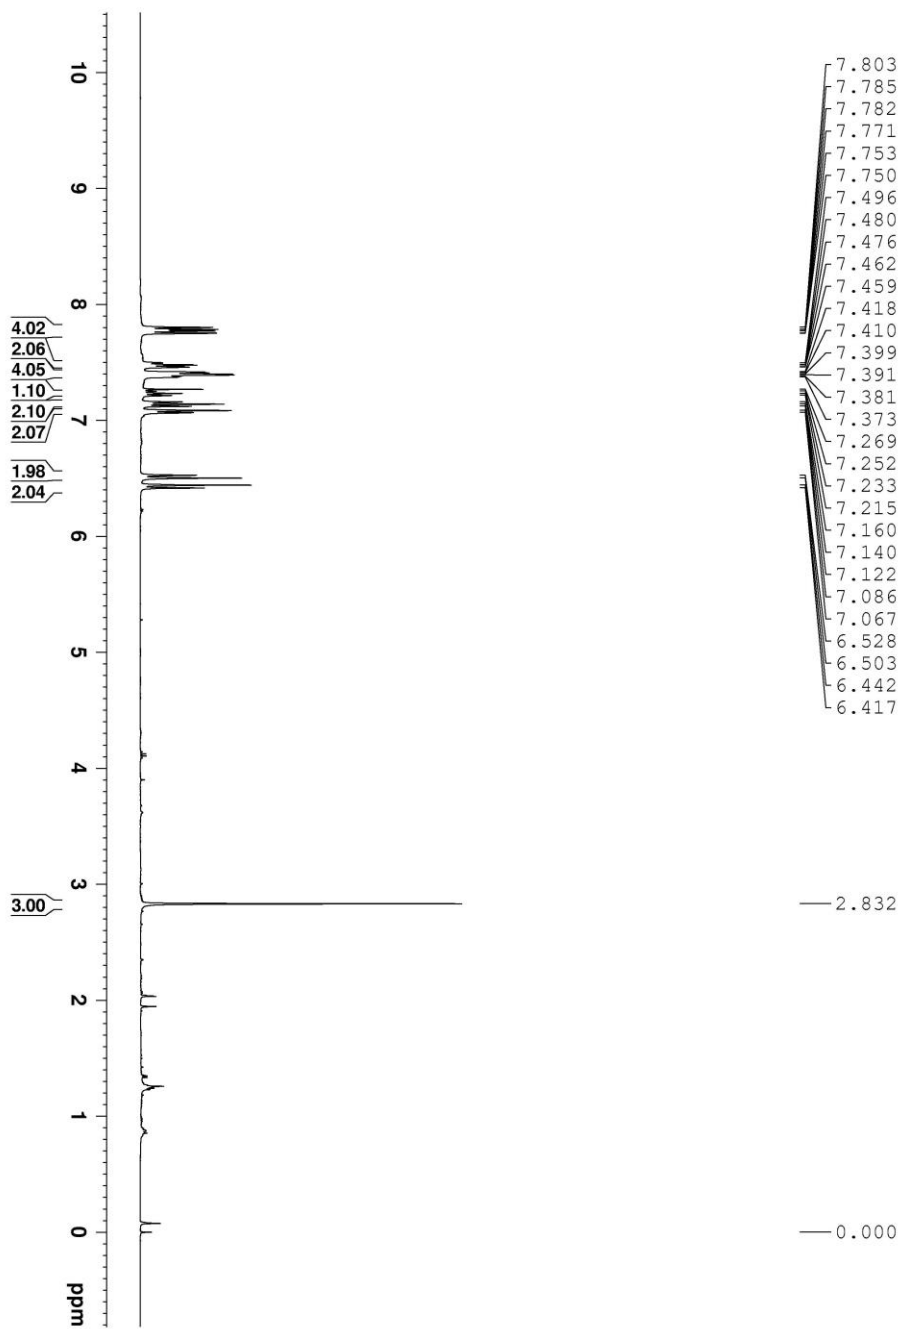

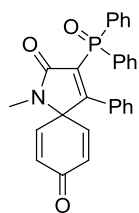

**3d**, 71%

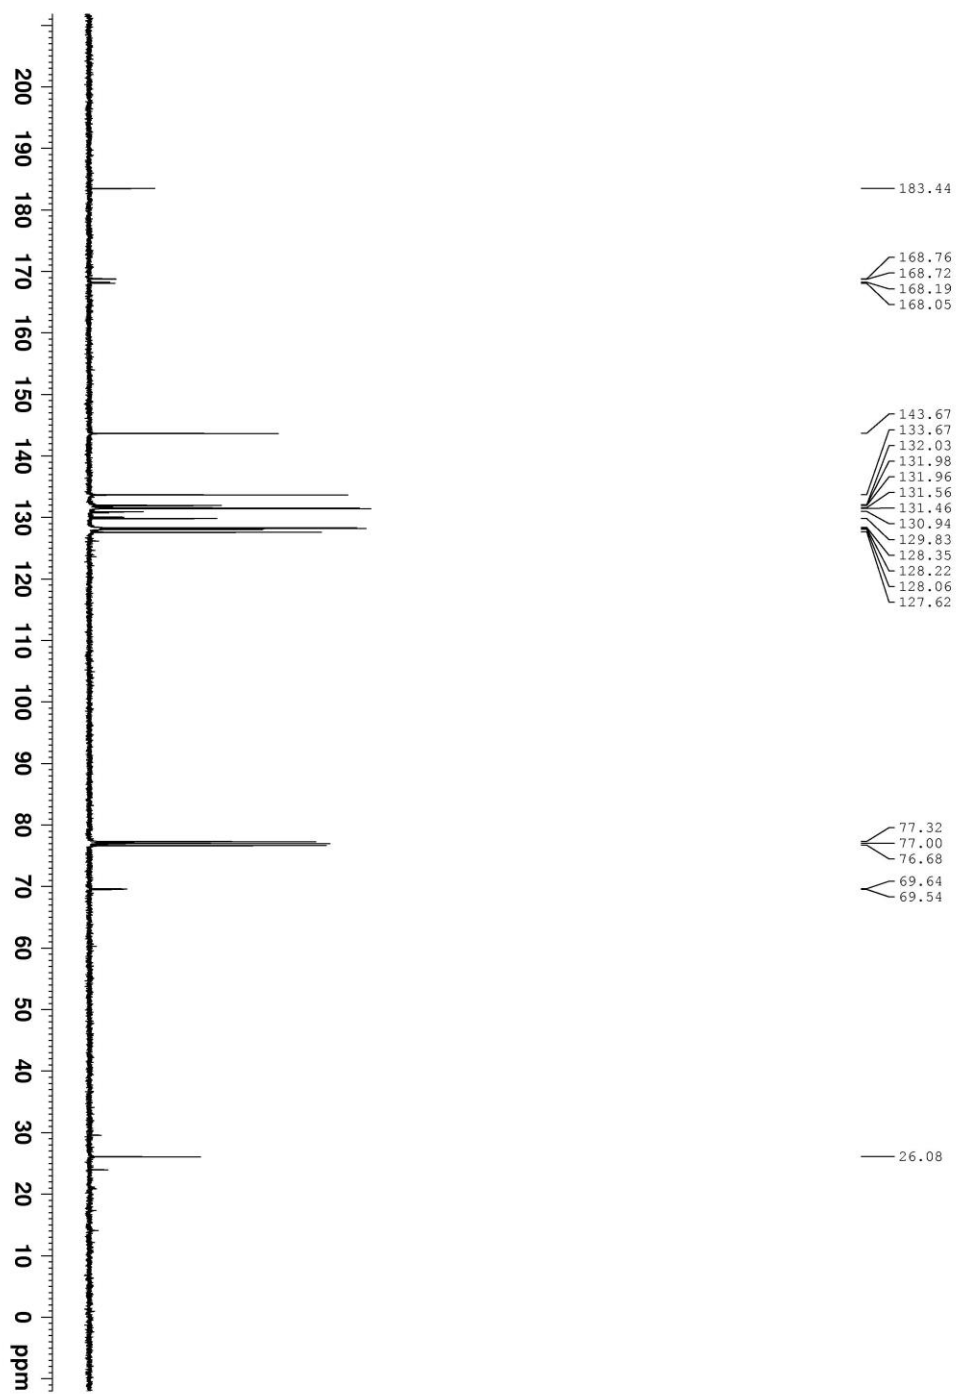

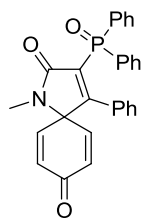

3d, 71%

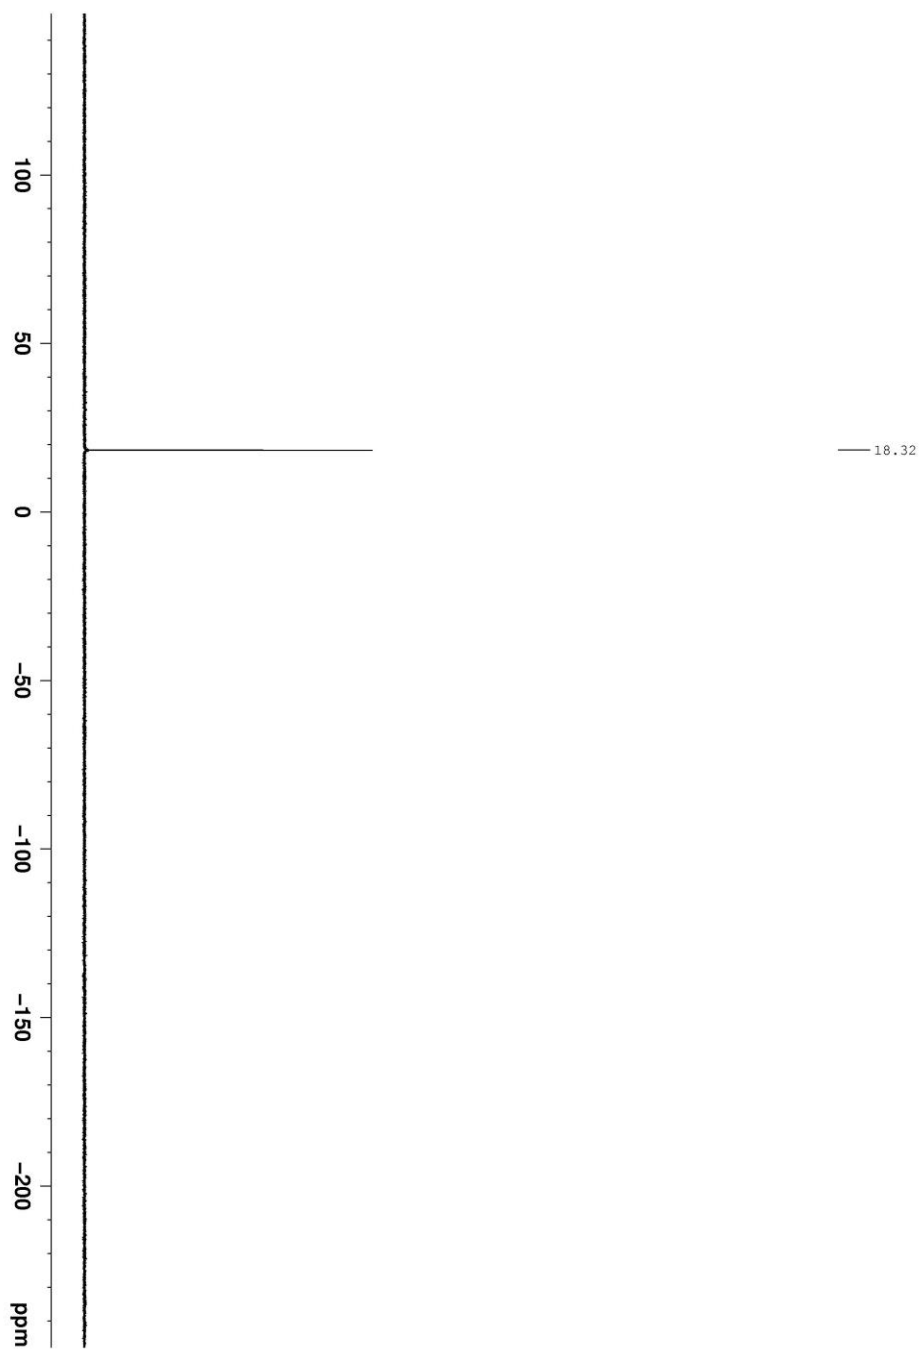



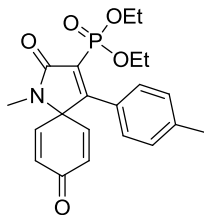

**3e**, 69%

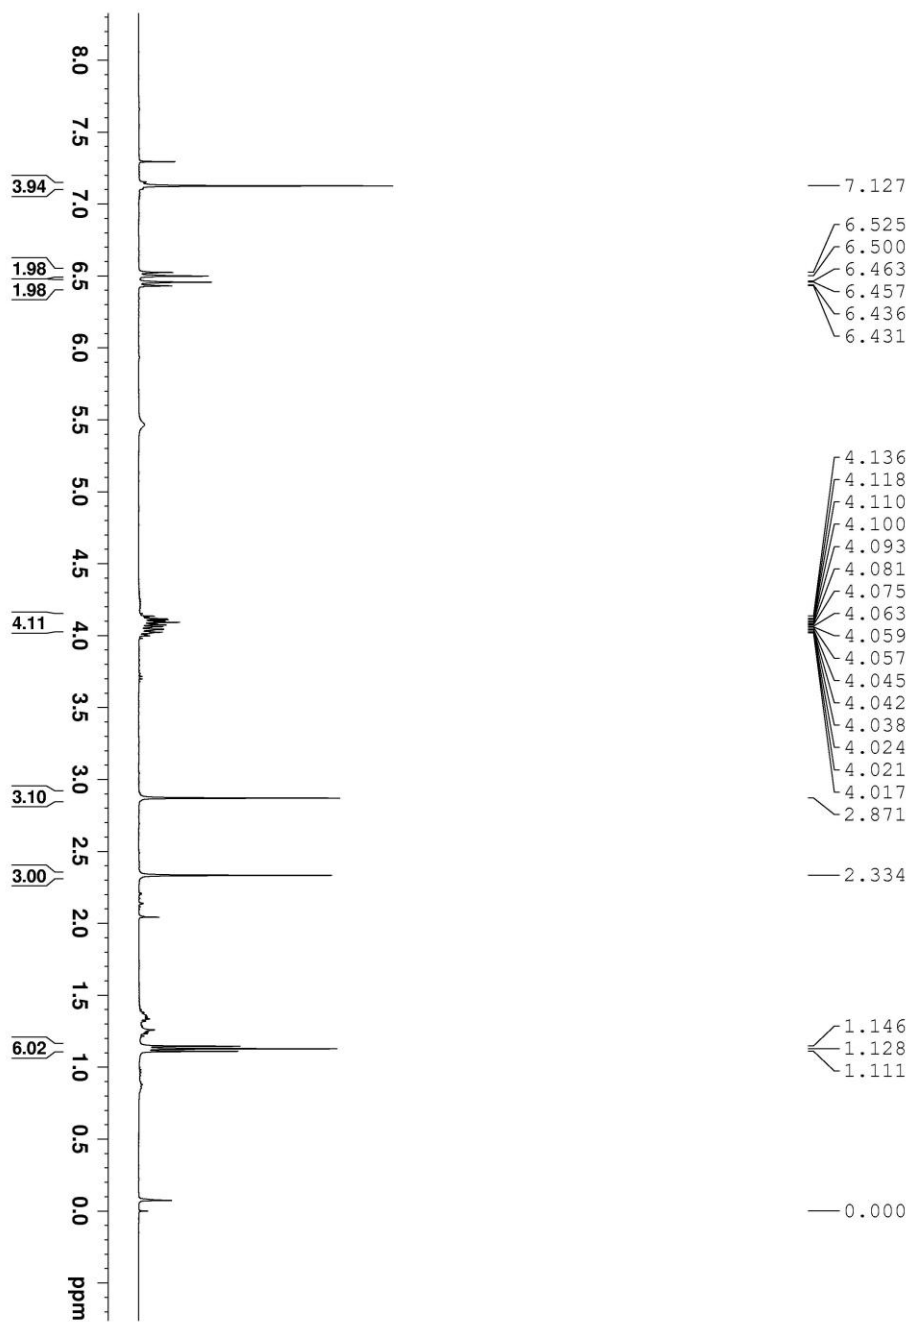

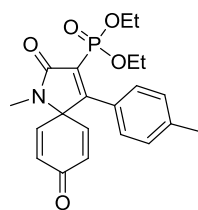

**3e**, 69%

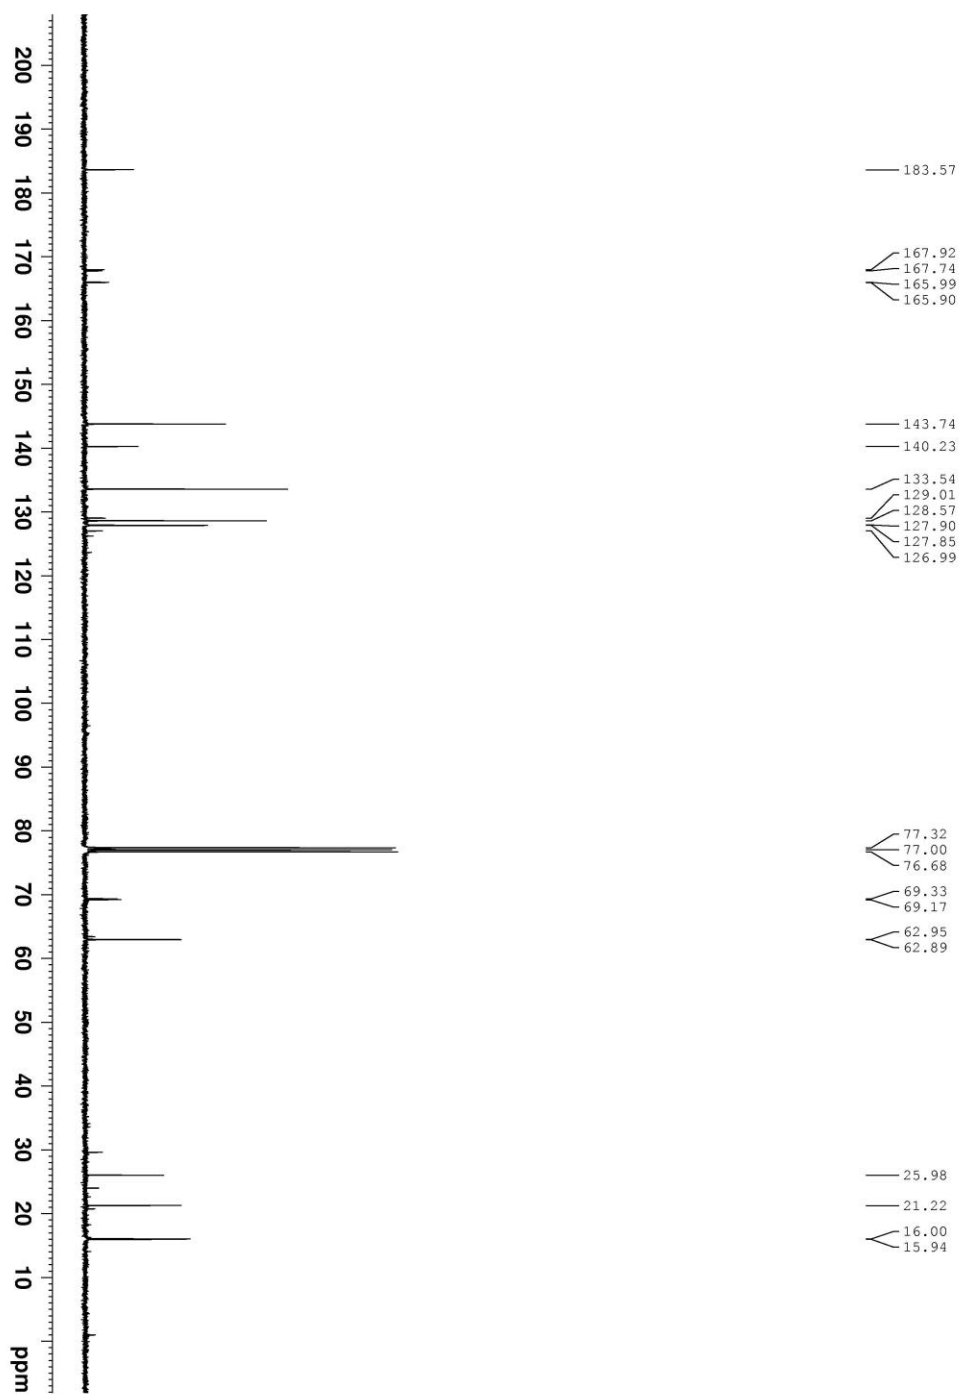

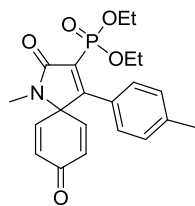

**3e**, 69%

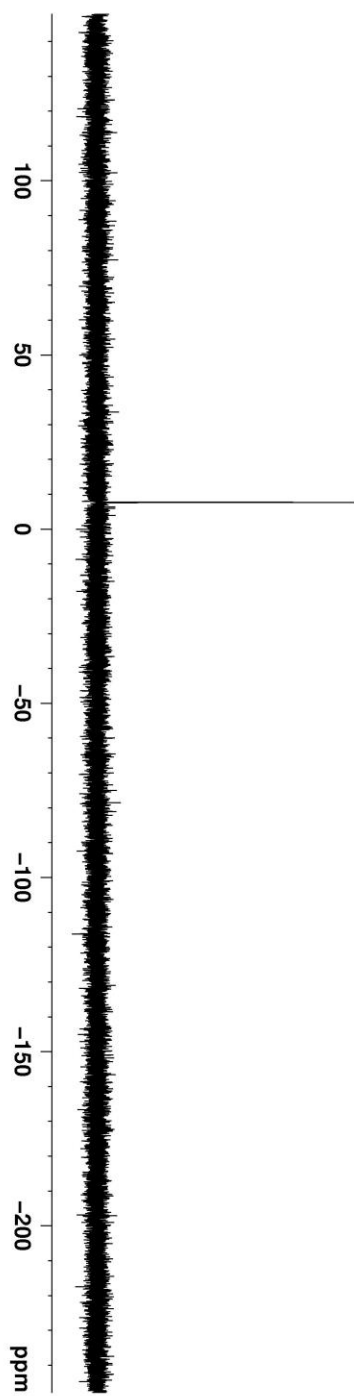

— 7.71

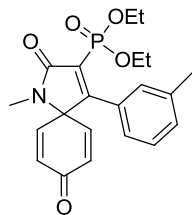

**3f, 72%**

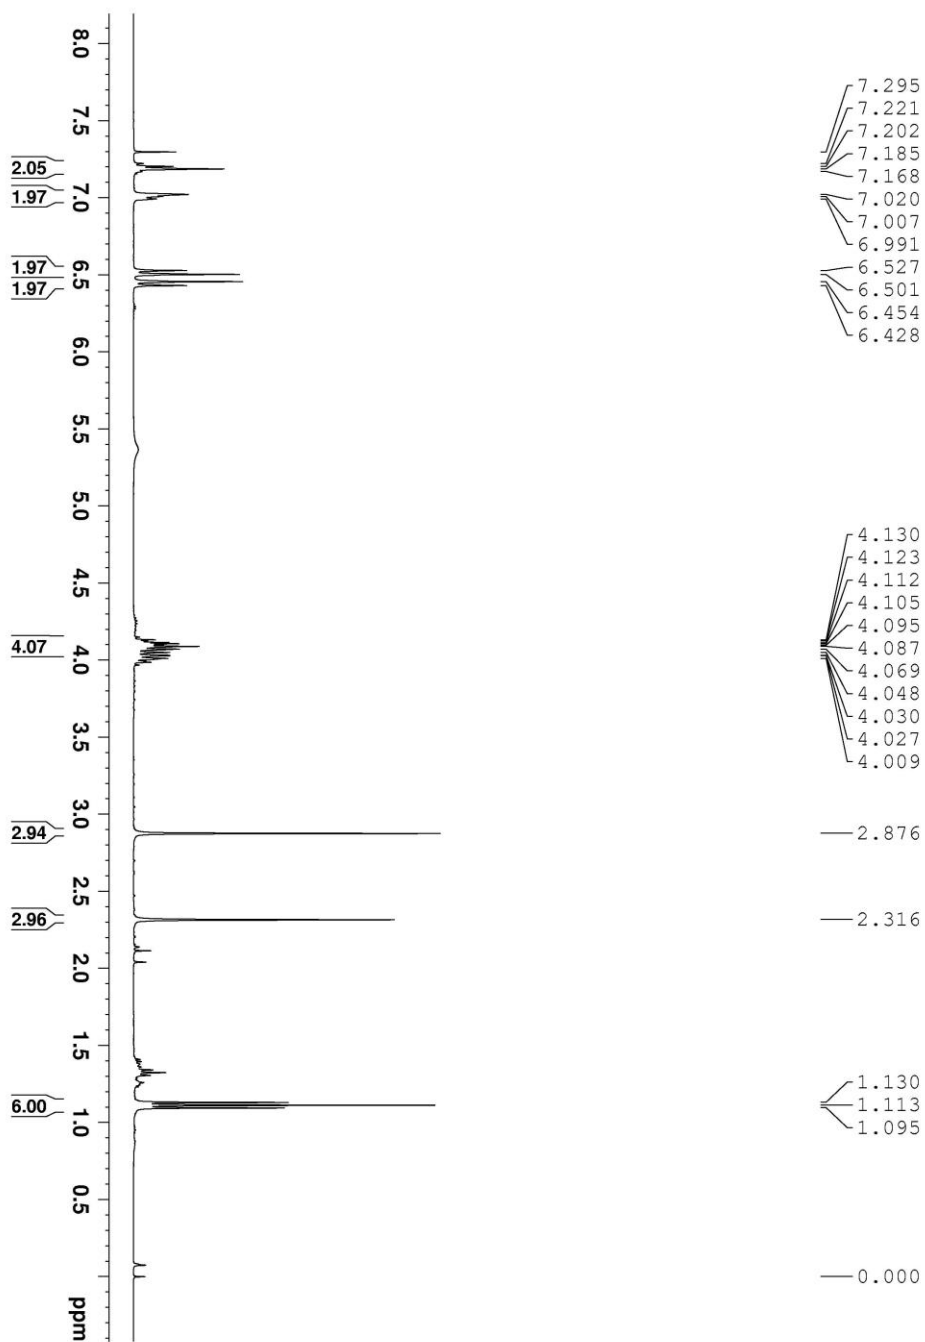

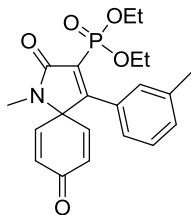

3f, 72%

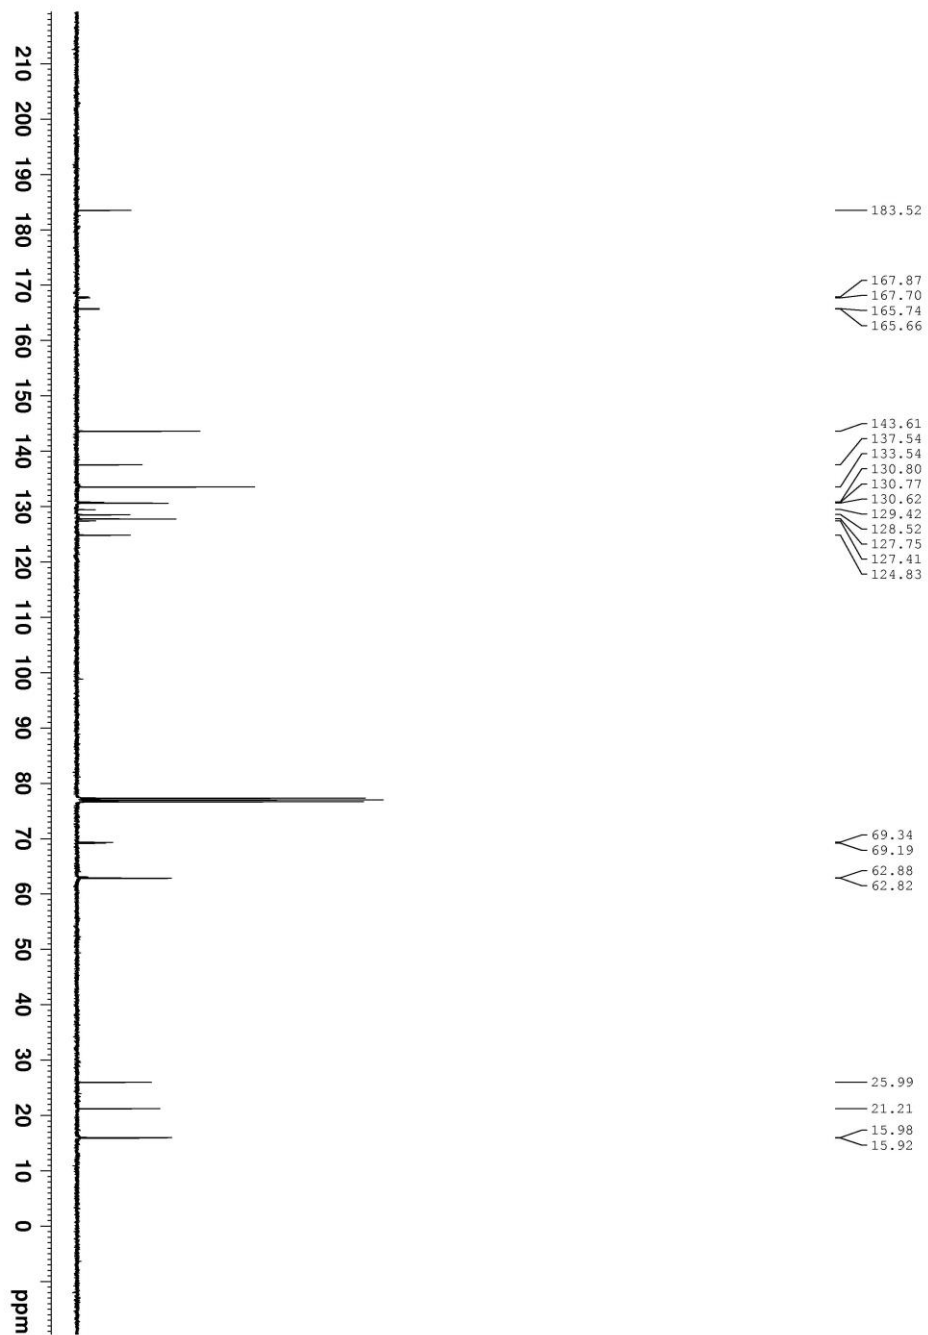

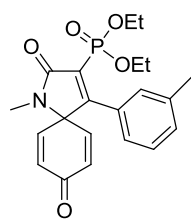

3f, 72%

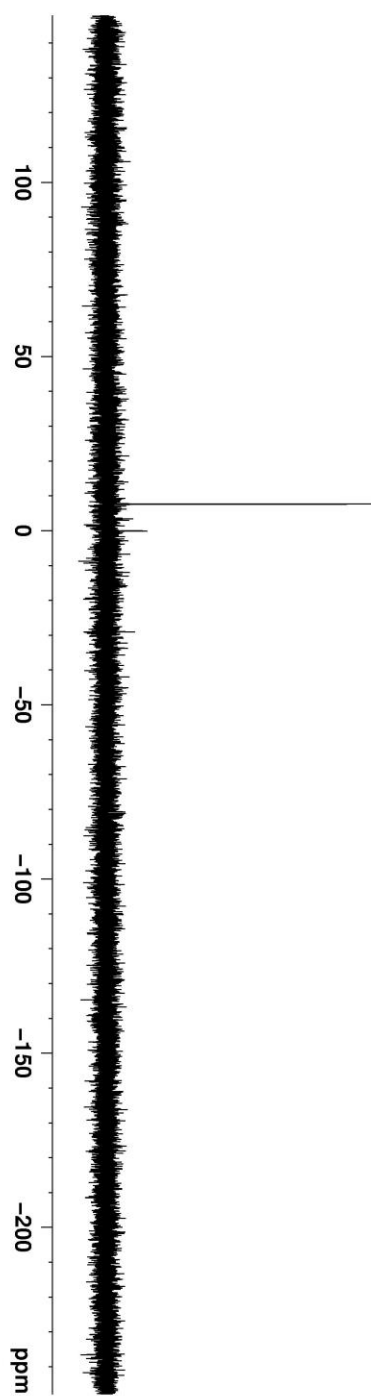

7.63

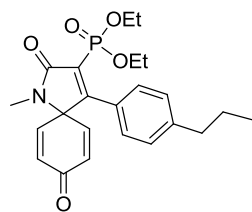

**3g**, 72%

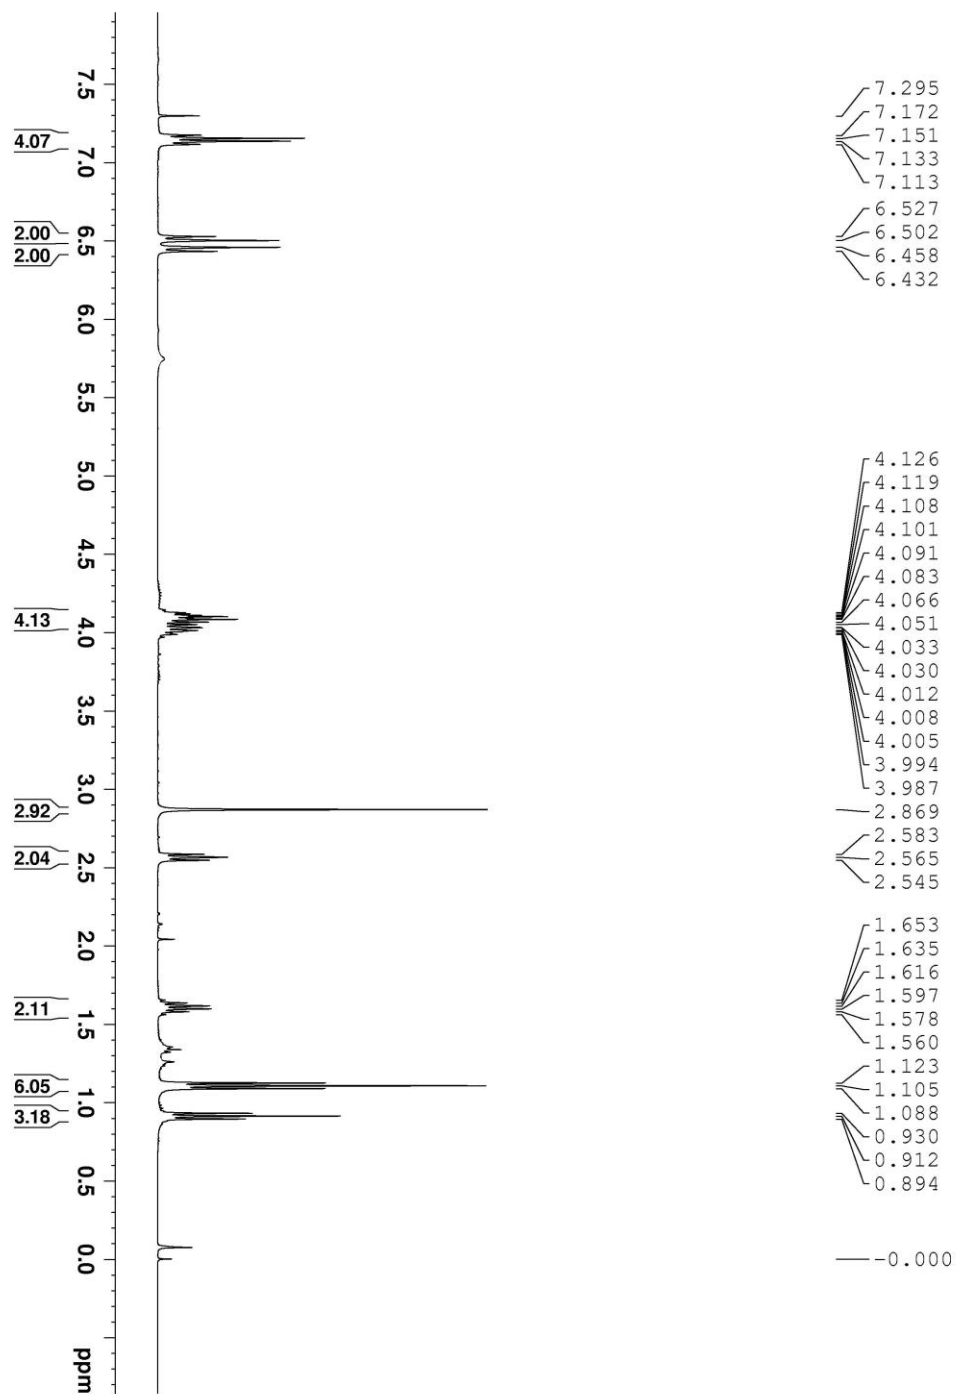

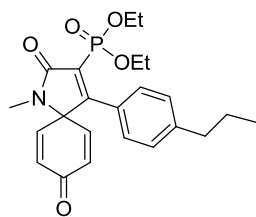

**3g**, 72%

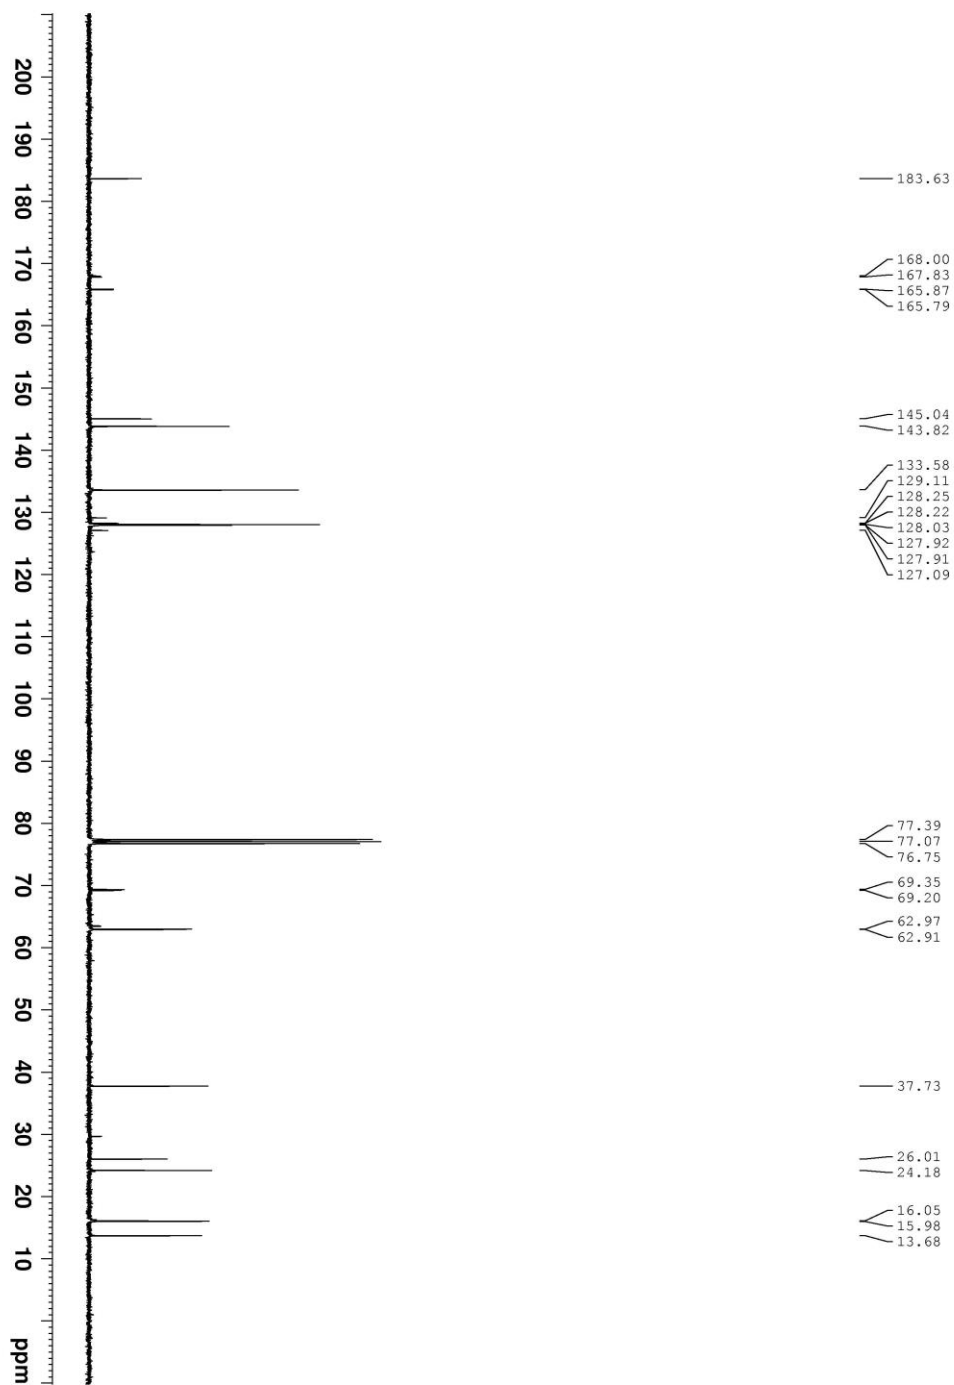



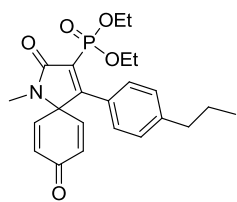

**3g**, 72%

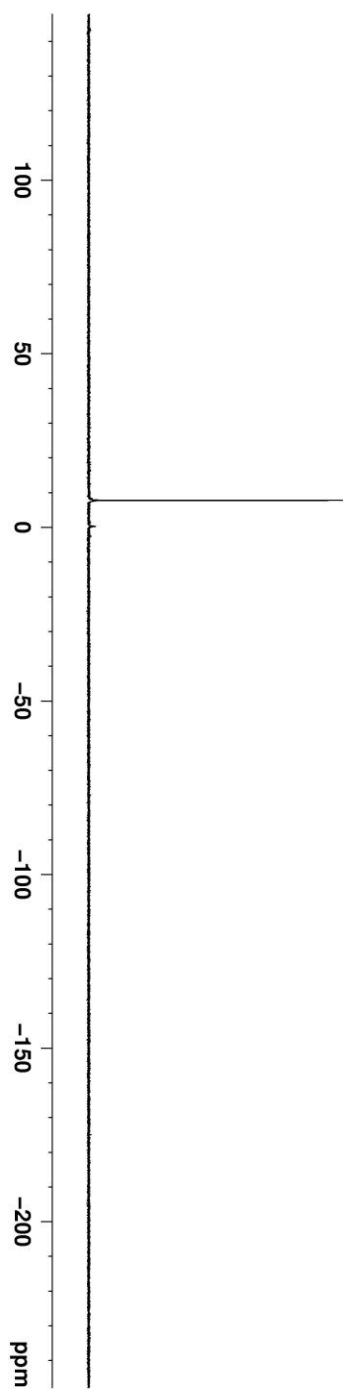

7.78

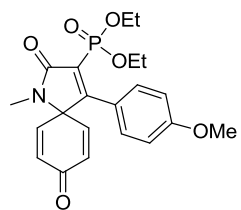

**3h**, 72%

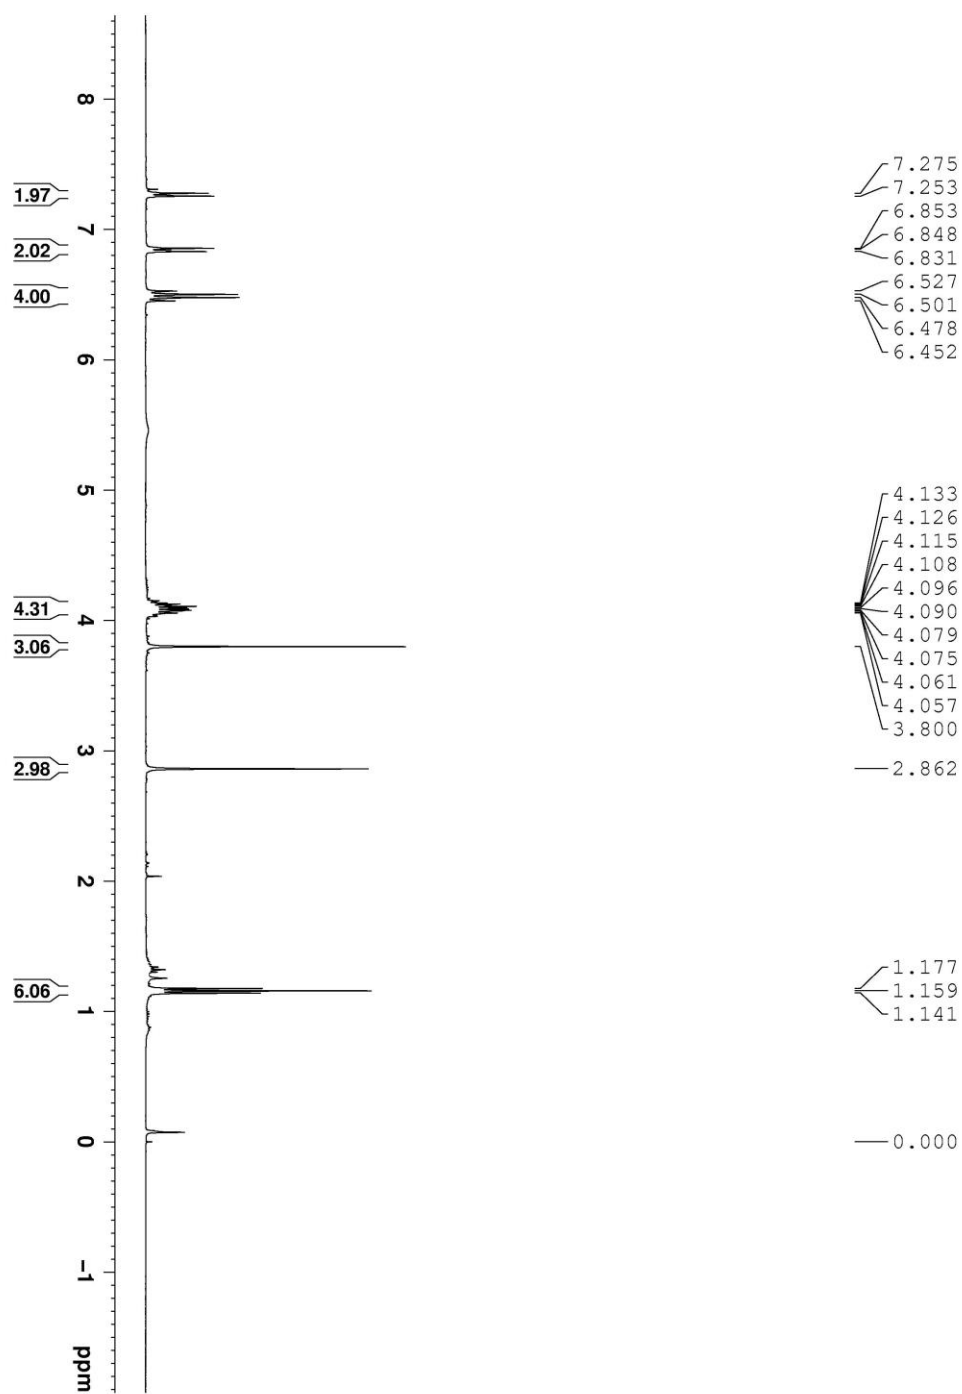

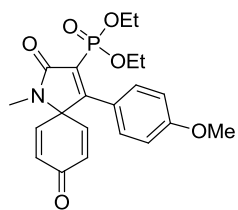

3h, 72%

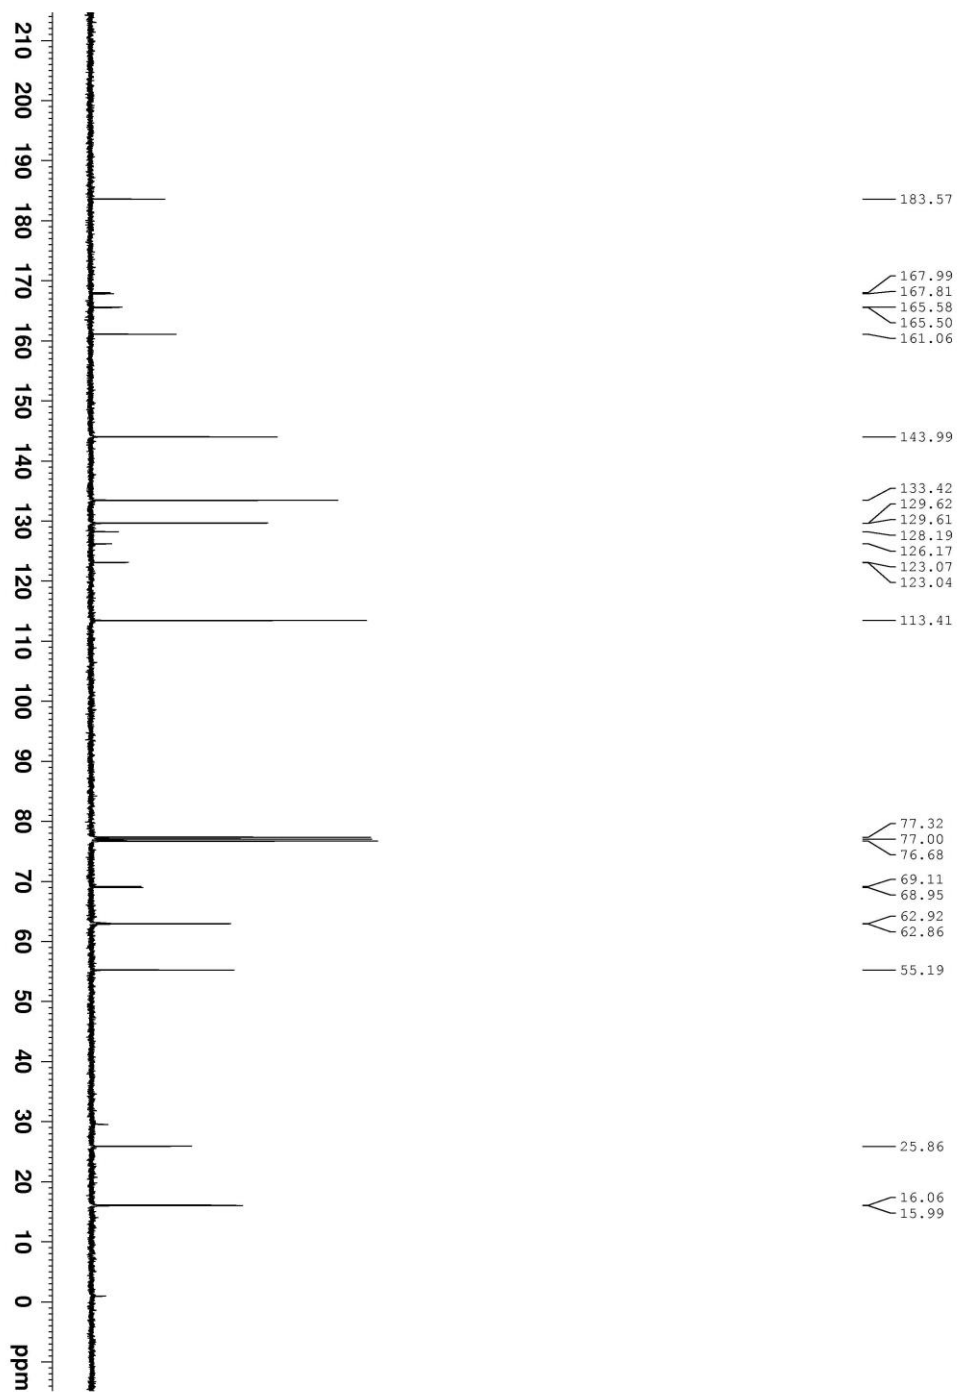

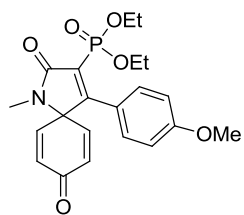

**3h**, 72%

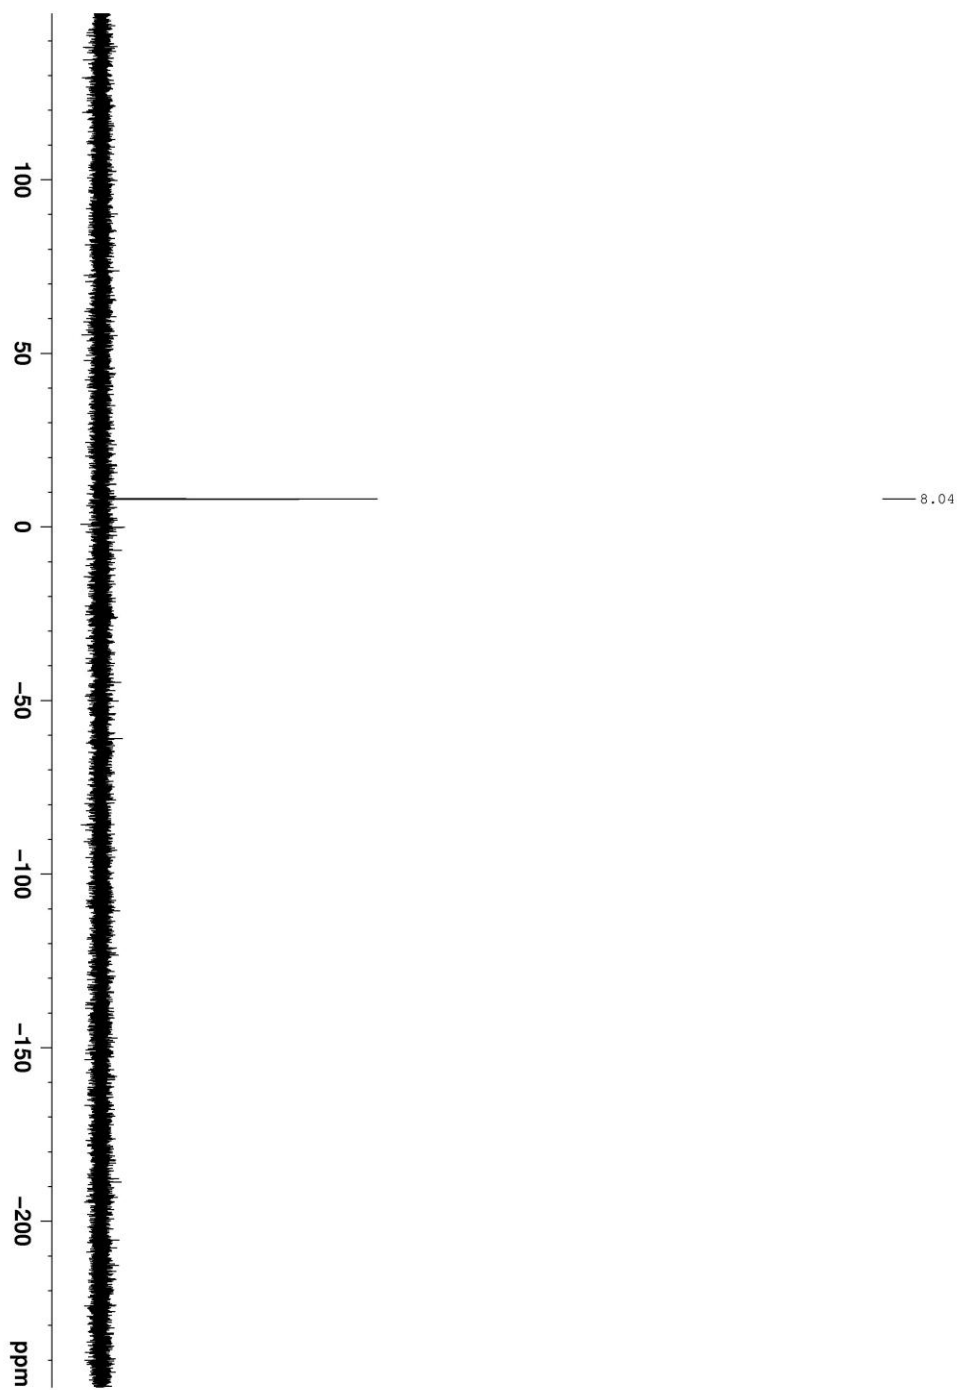

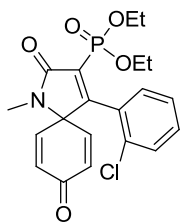

**3i**, 77%

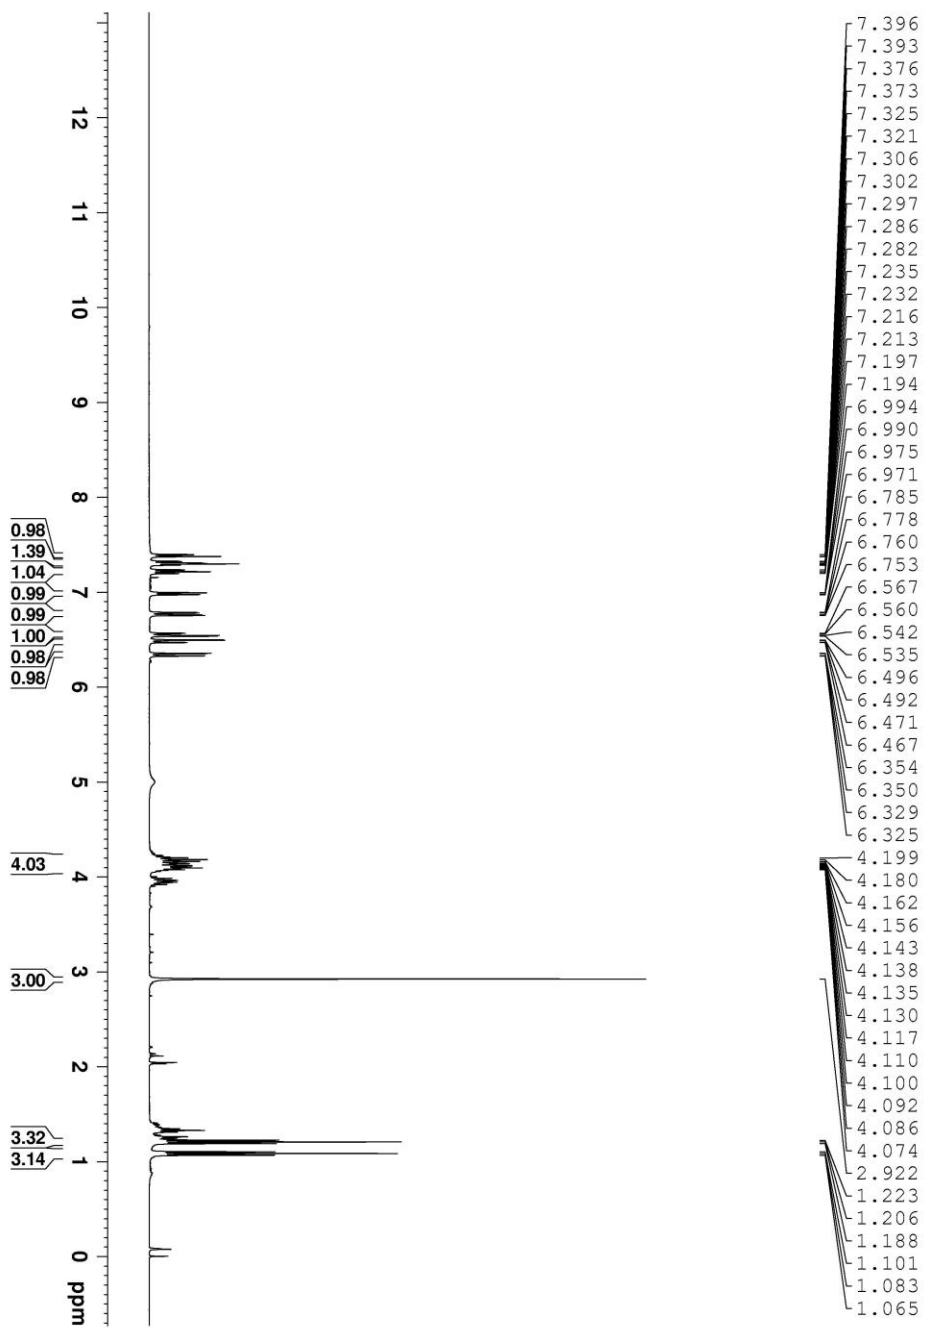

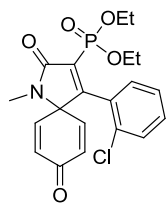

3i, 77%

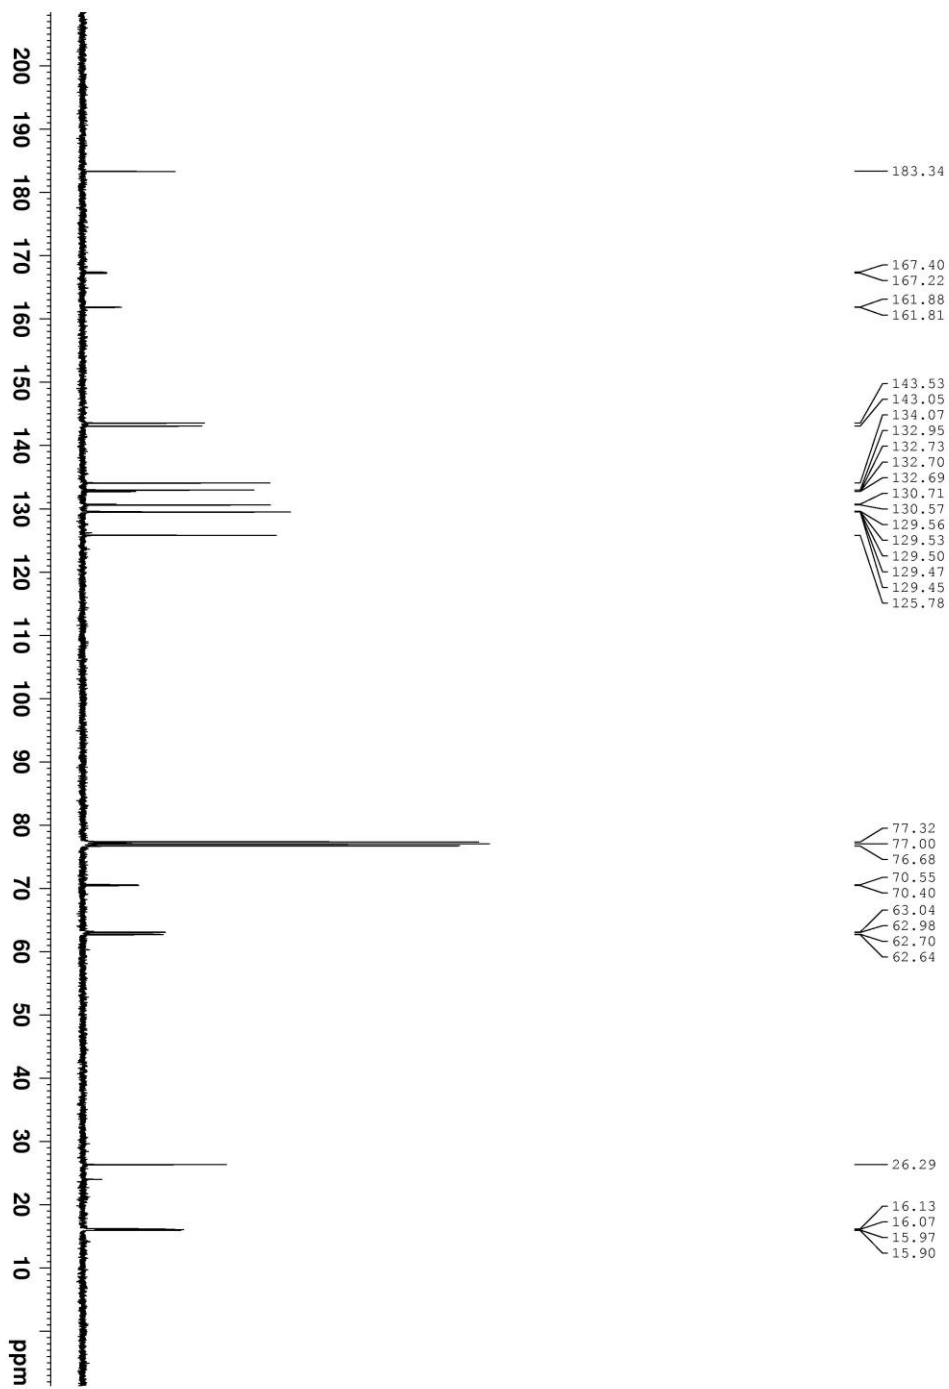

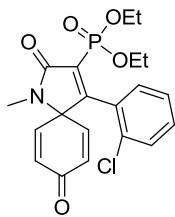

**3i**, 77%

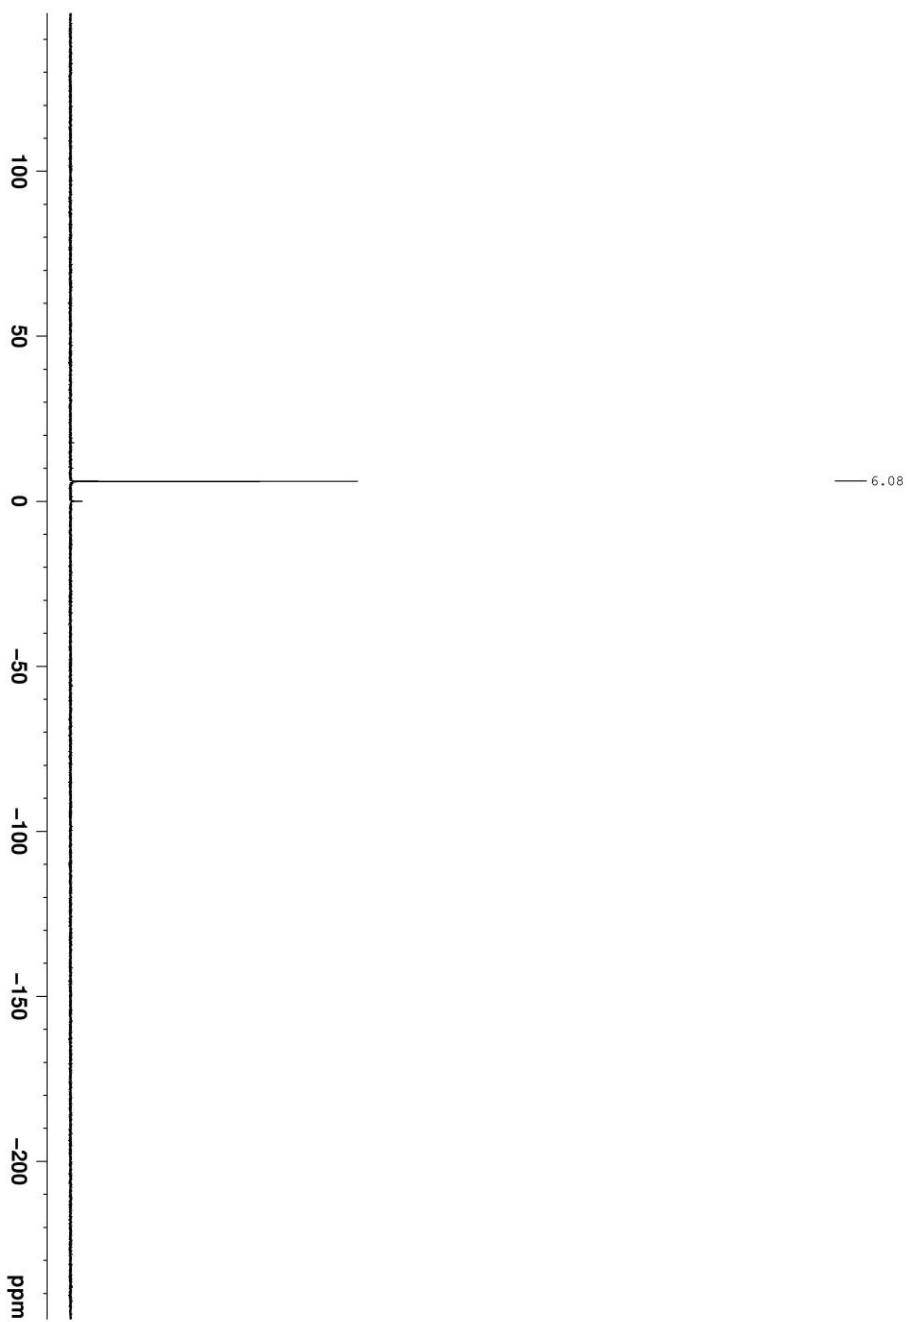

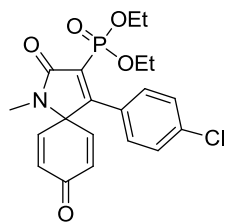

**3j**, 75%

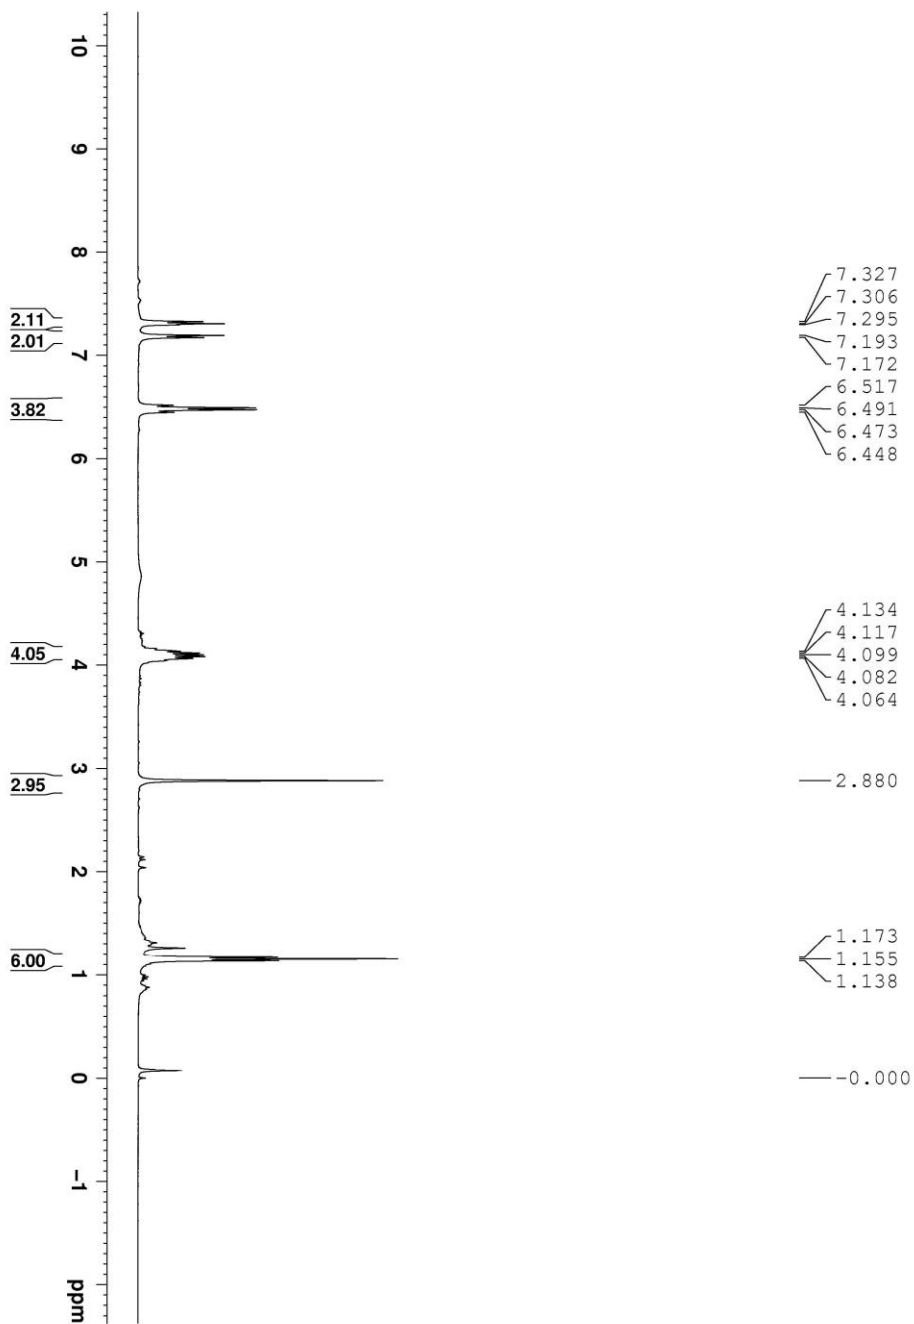



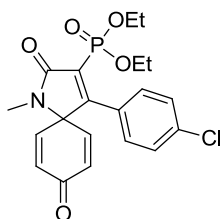

**3j**, 75%

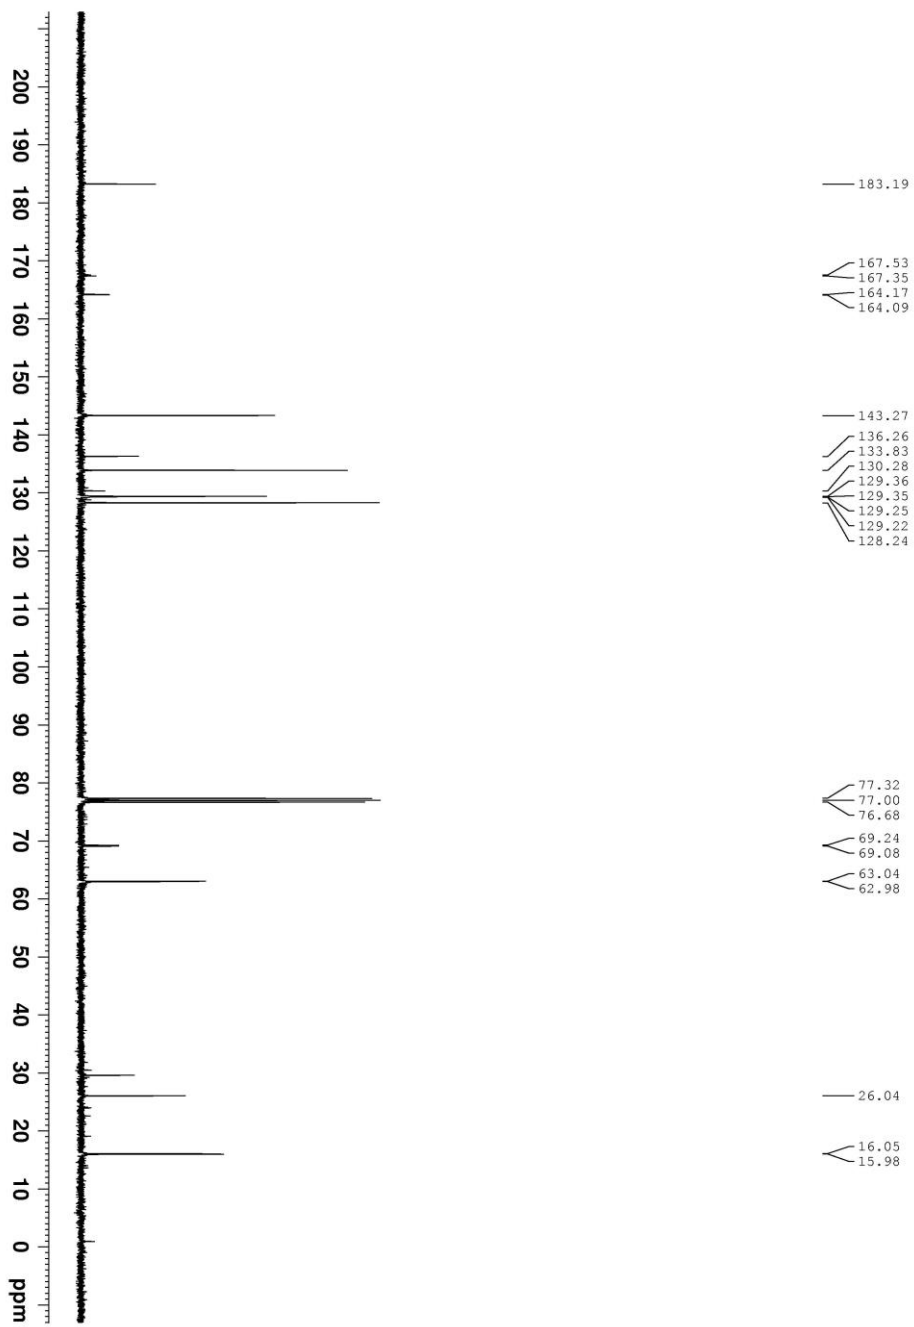

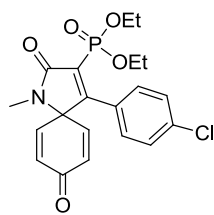

**3j**, 75%

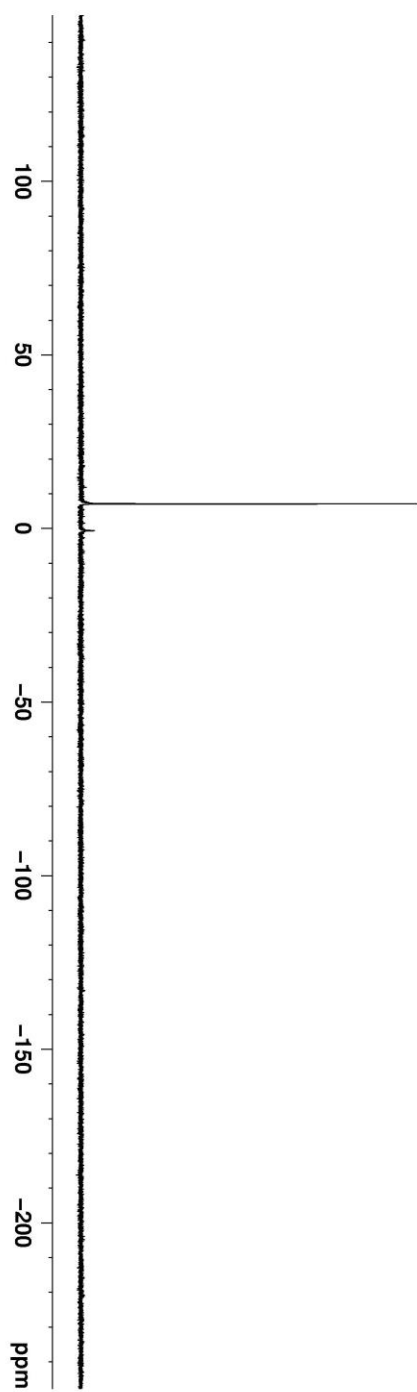

7.06

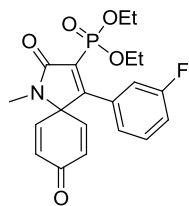

**3k**, 73%

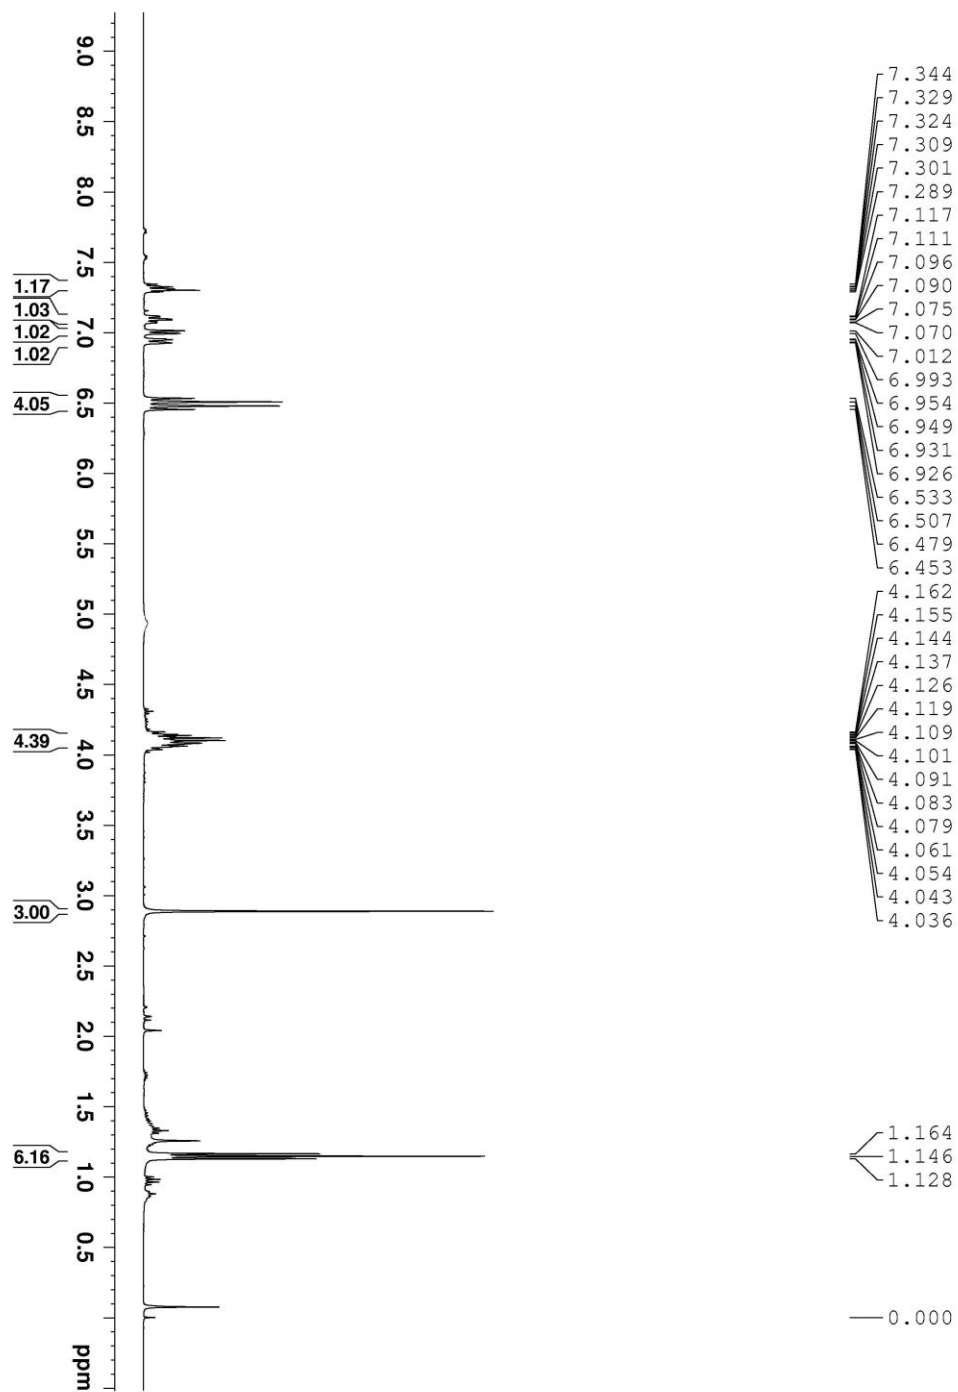

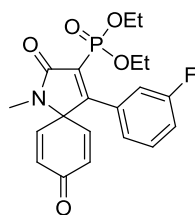

3k, 73%

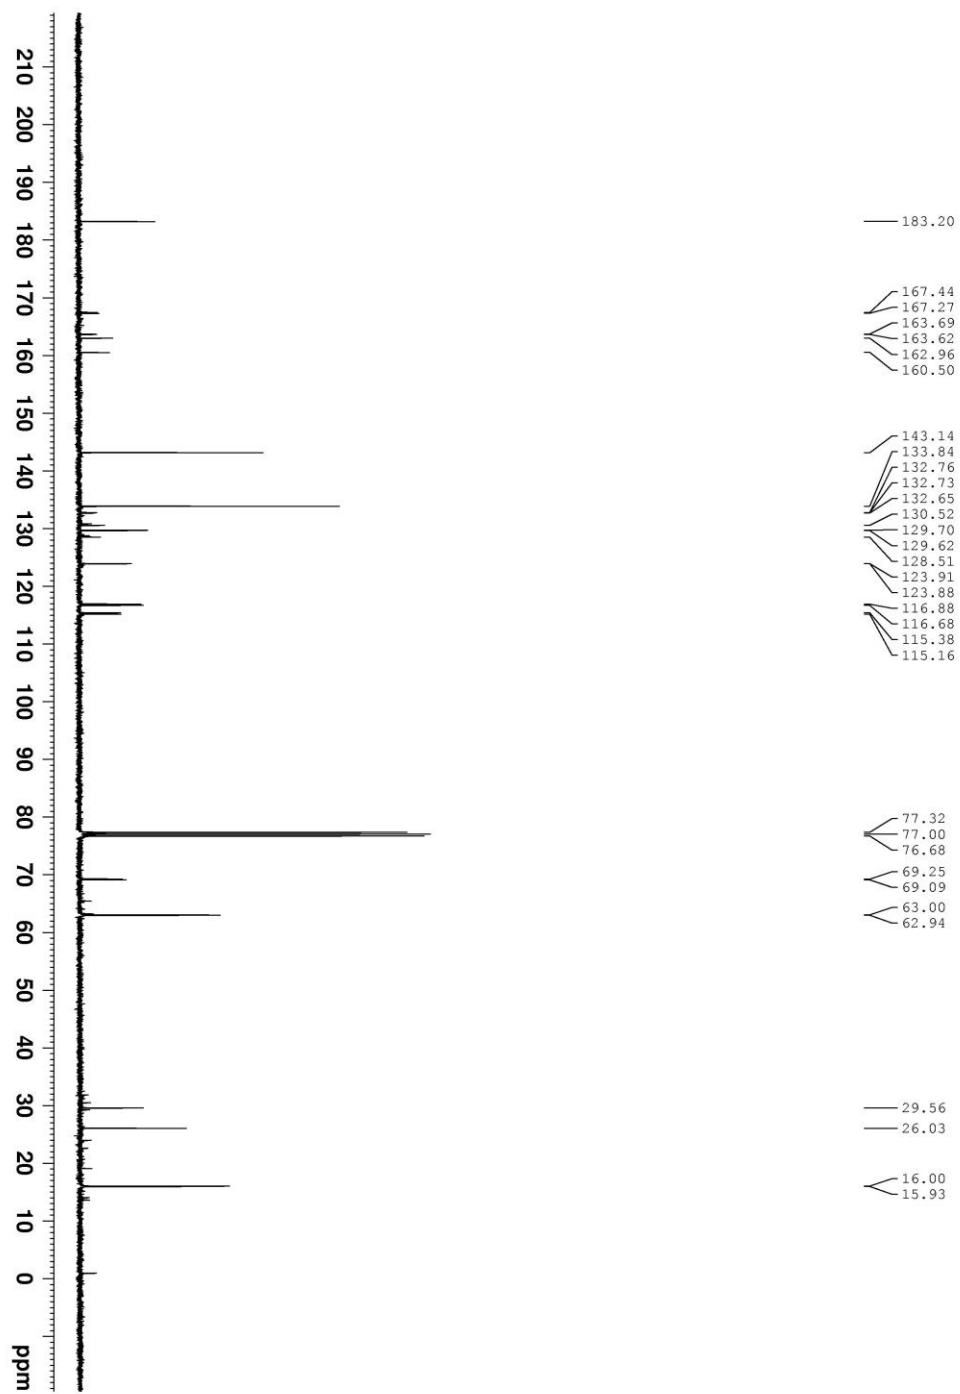

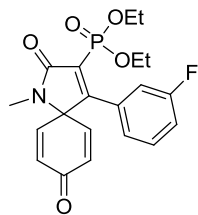

**3k**, 73%

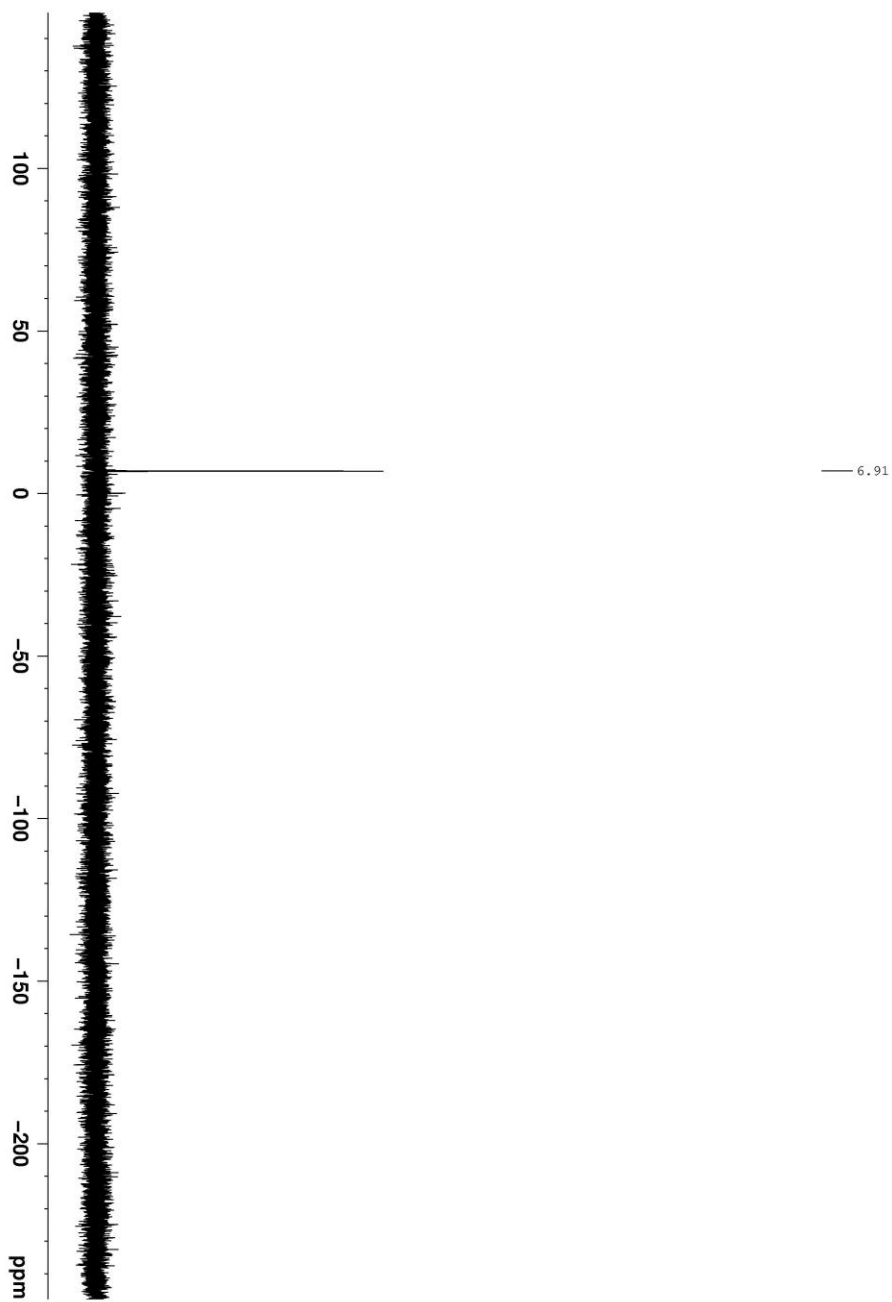

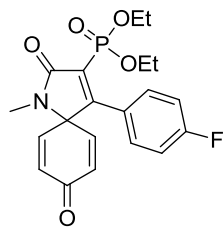

**3I**, 75%

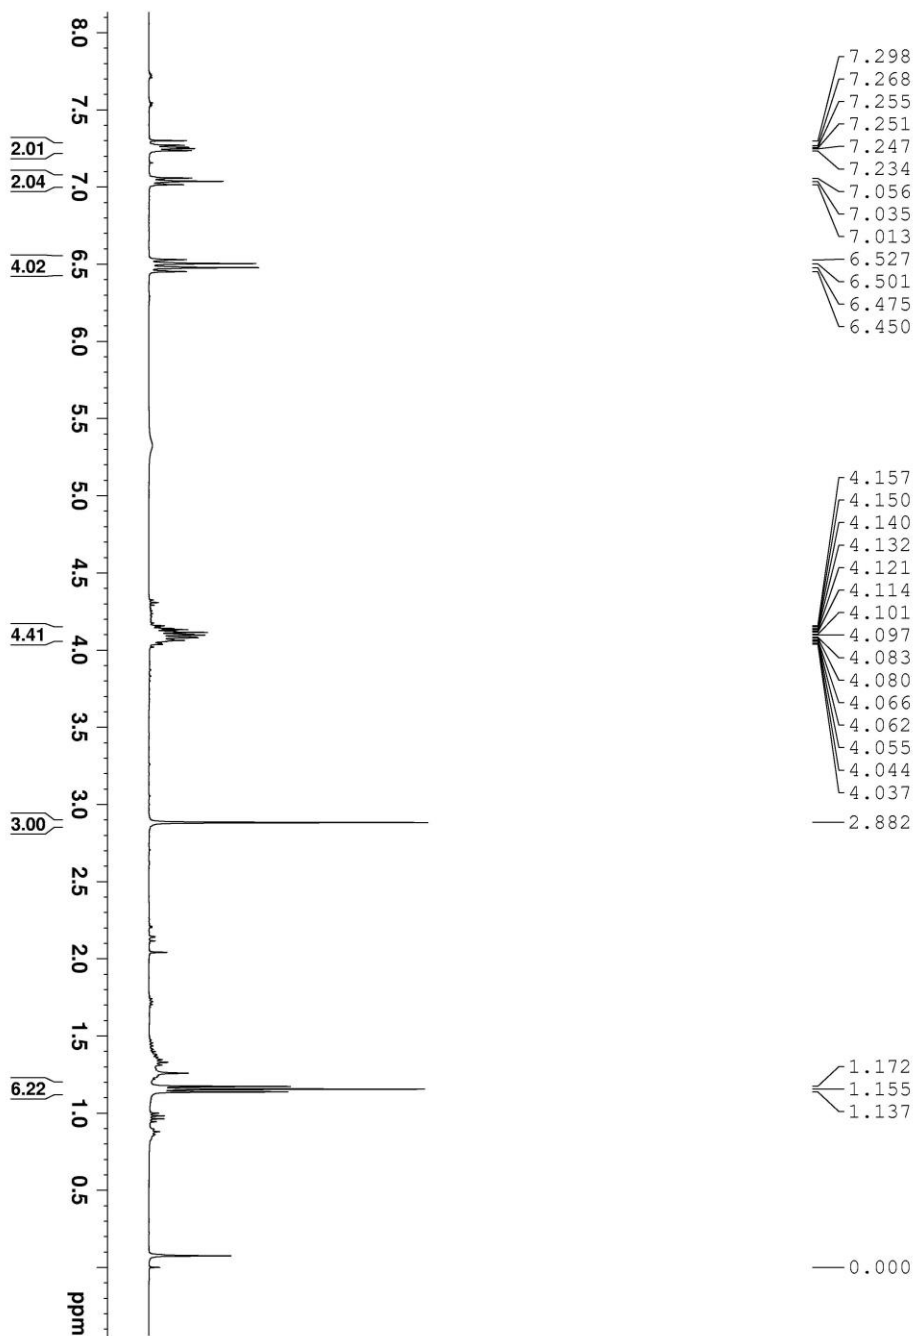

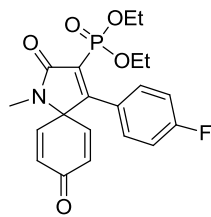

3I, 75%

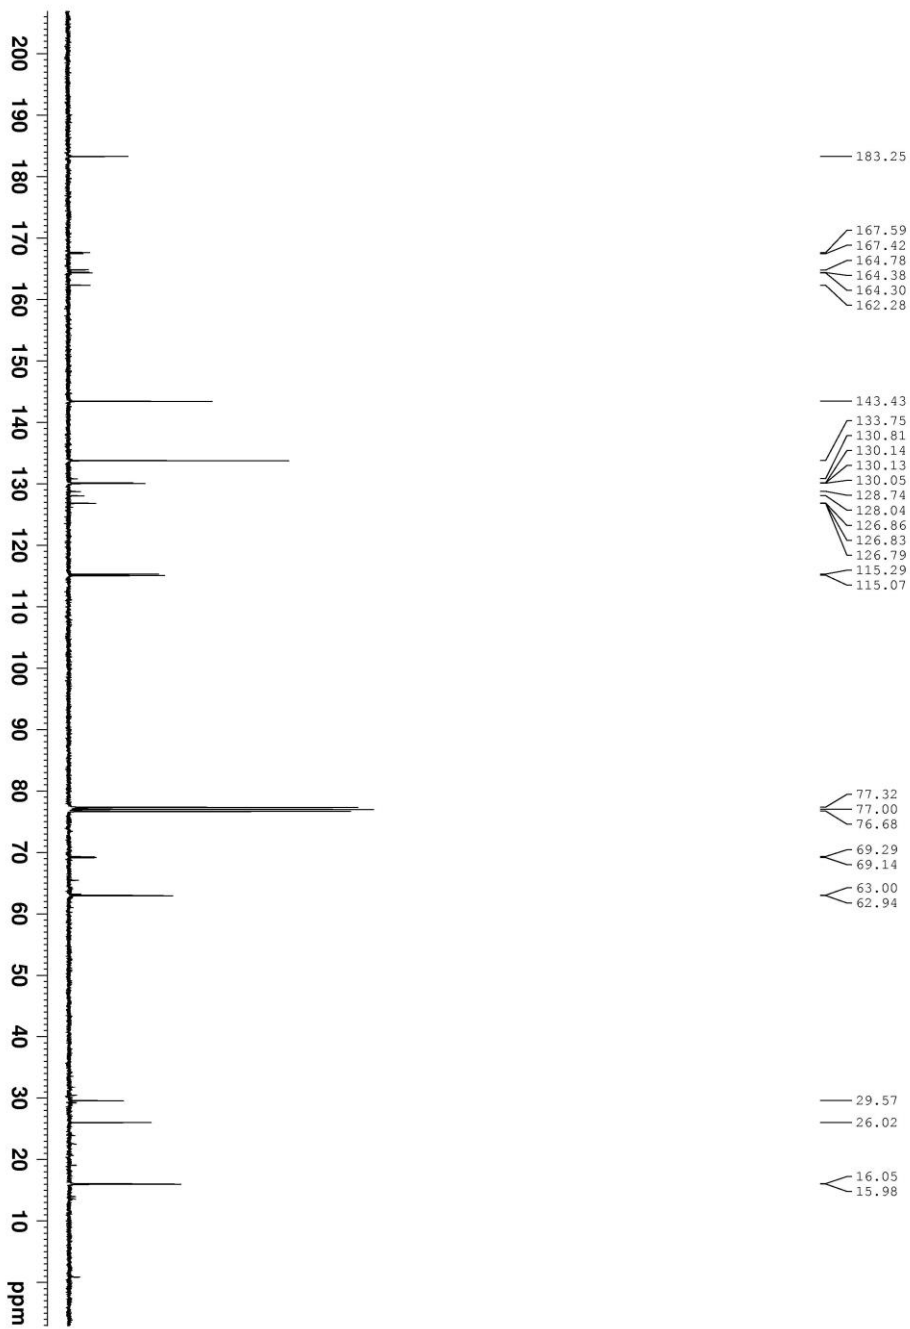

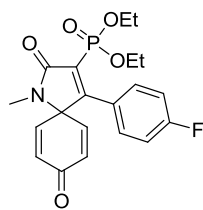

**3l**, 75%

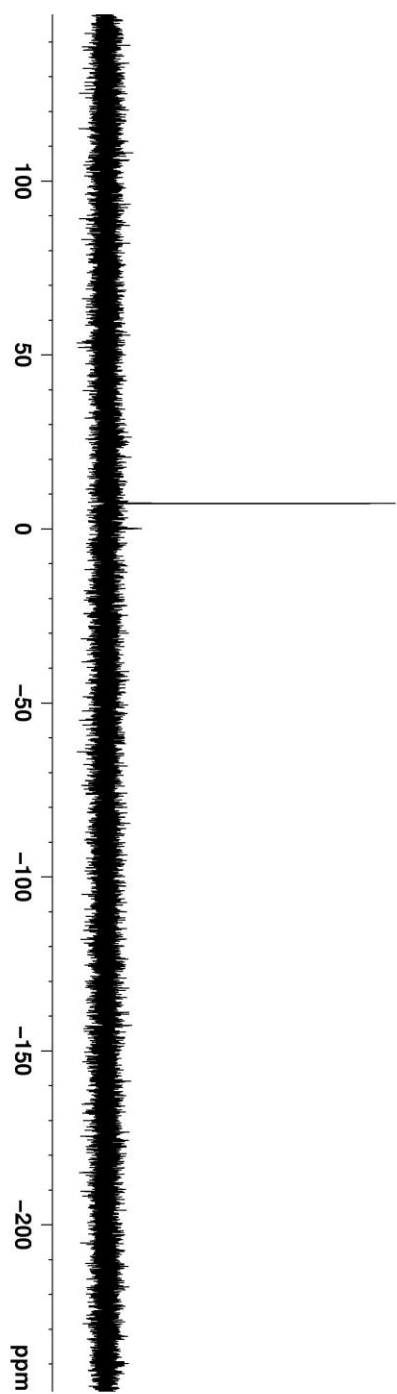

7.27



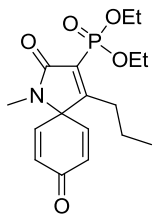

**3m**, 38%

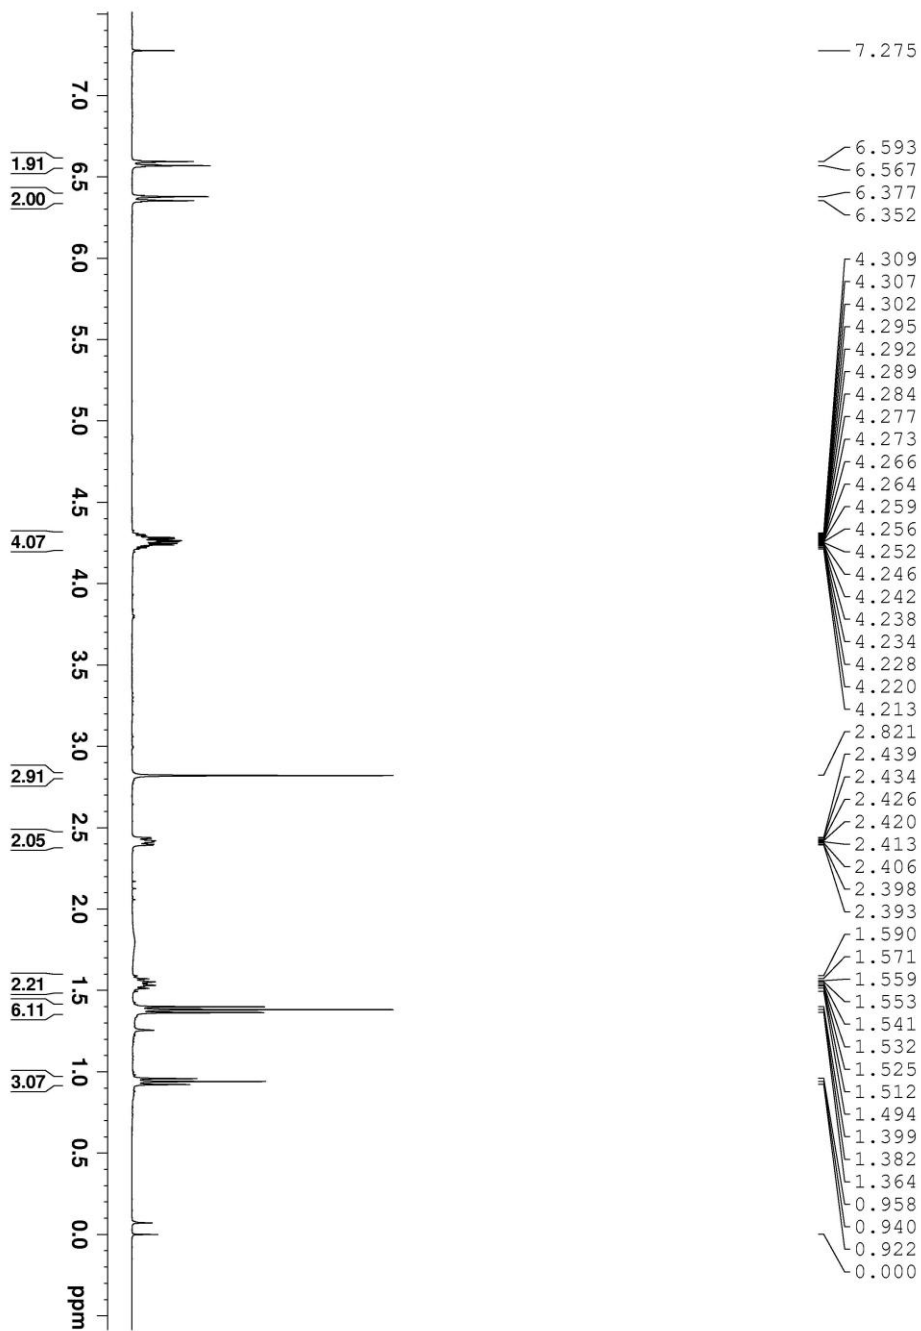

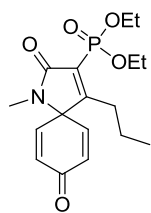

**3m**, 38%

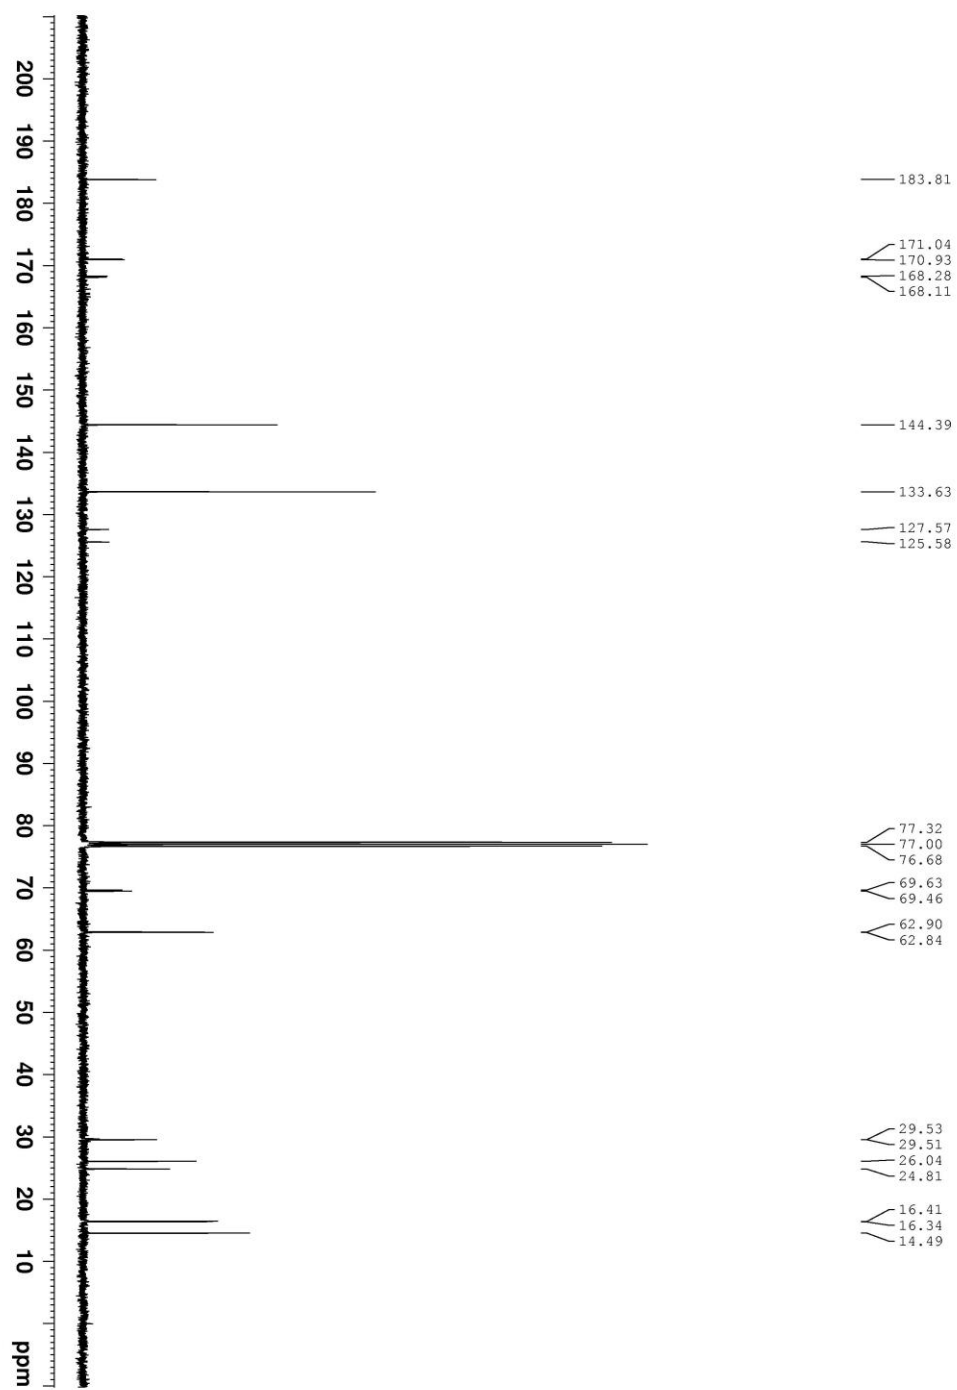

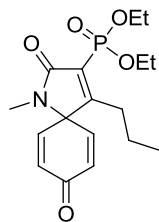

**3m**, 38%

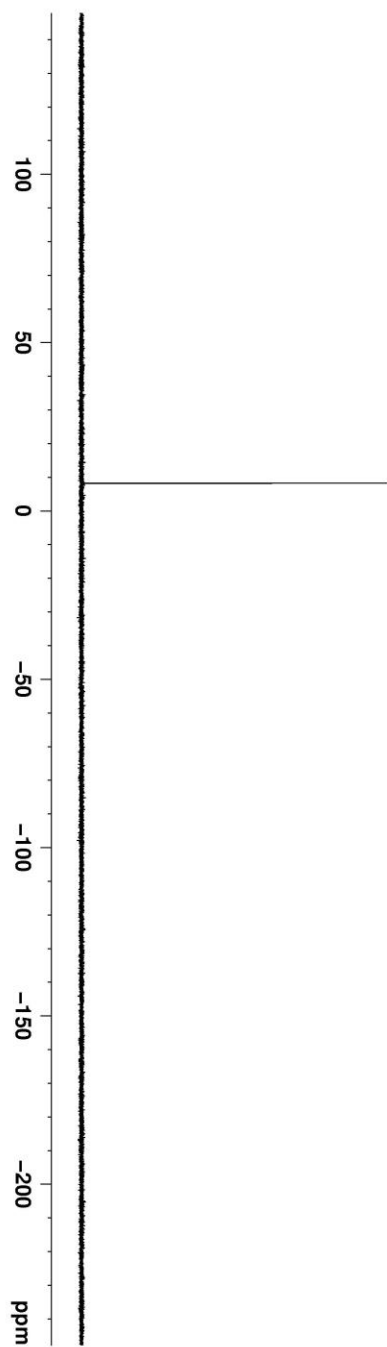

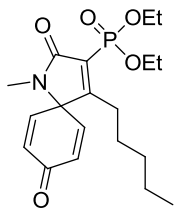

**3n**, 41%

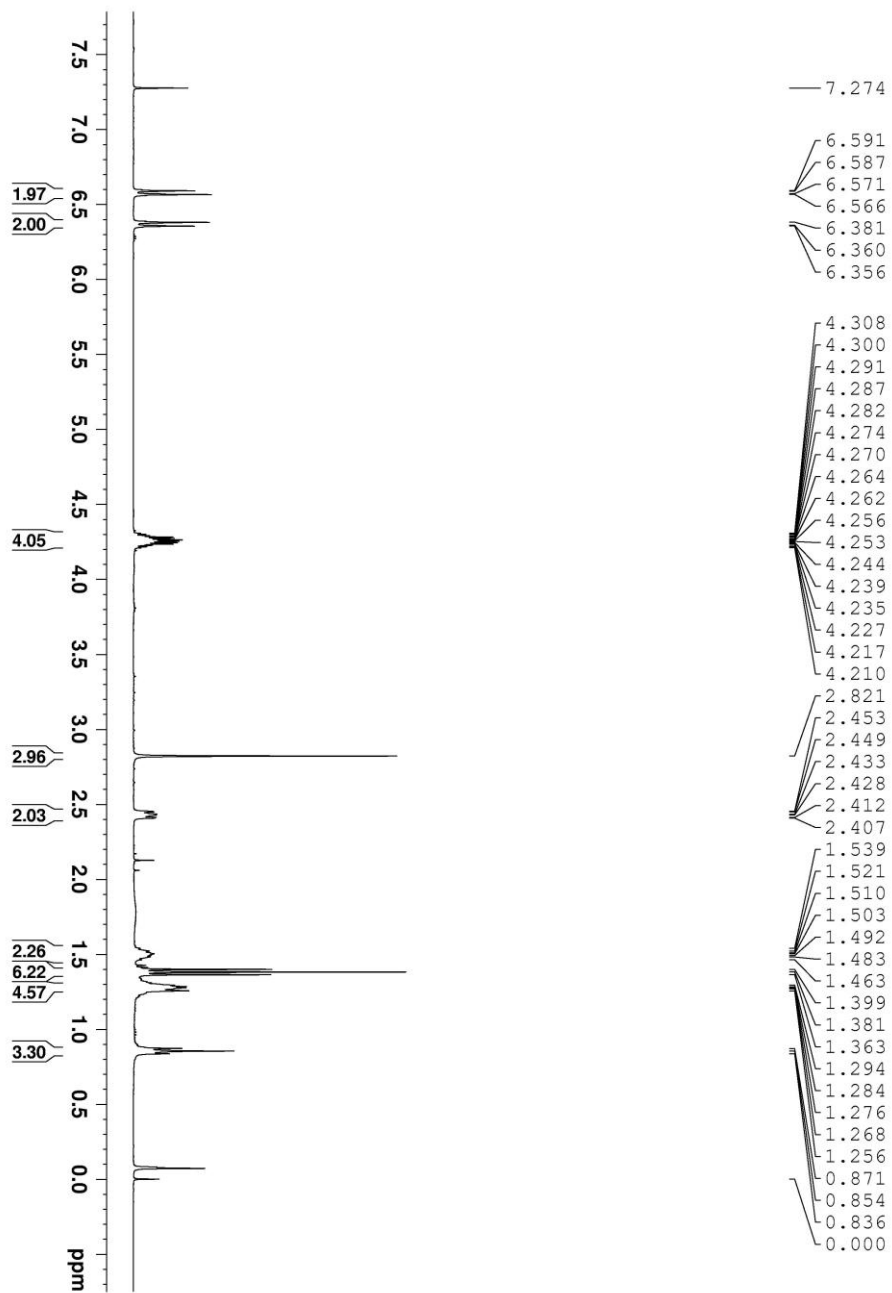

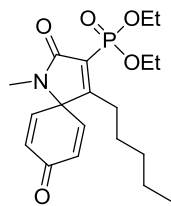

**3n**, 41%

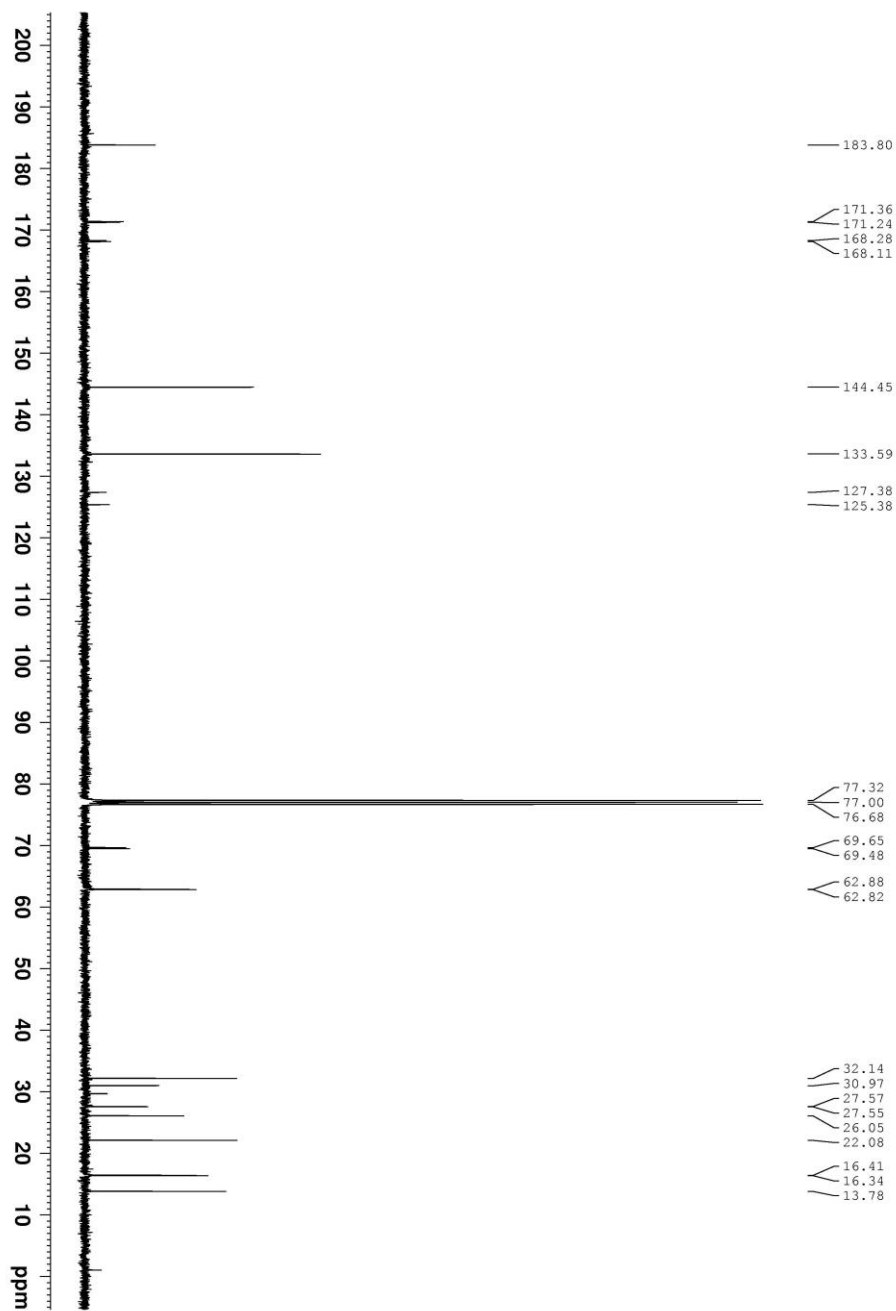

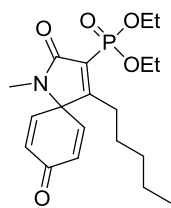

**3n**, 41%

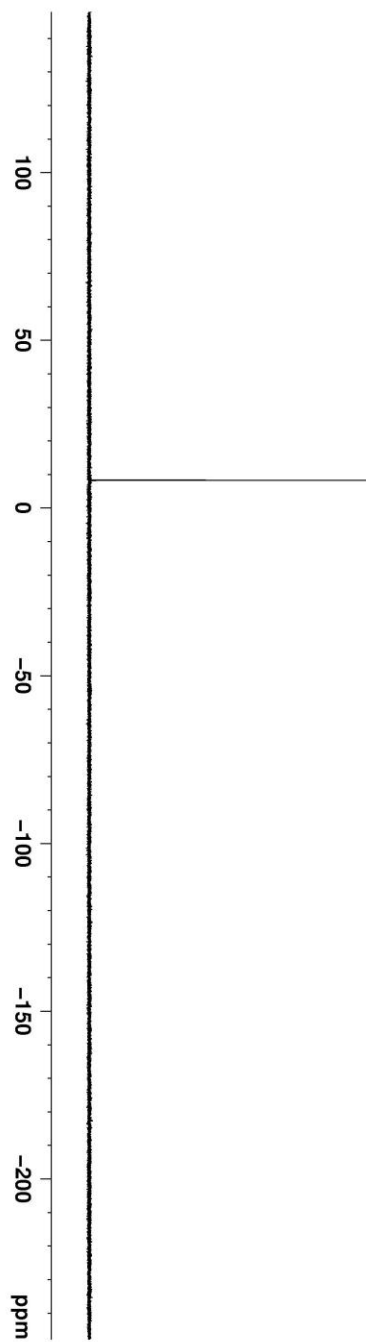

8.22

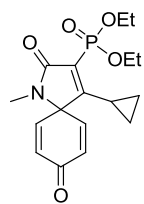

**3a**, 67%

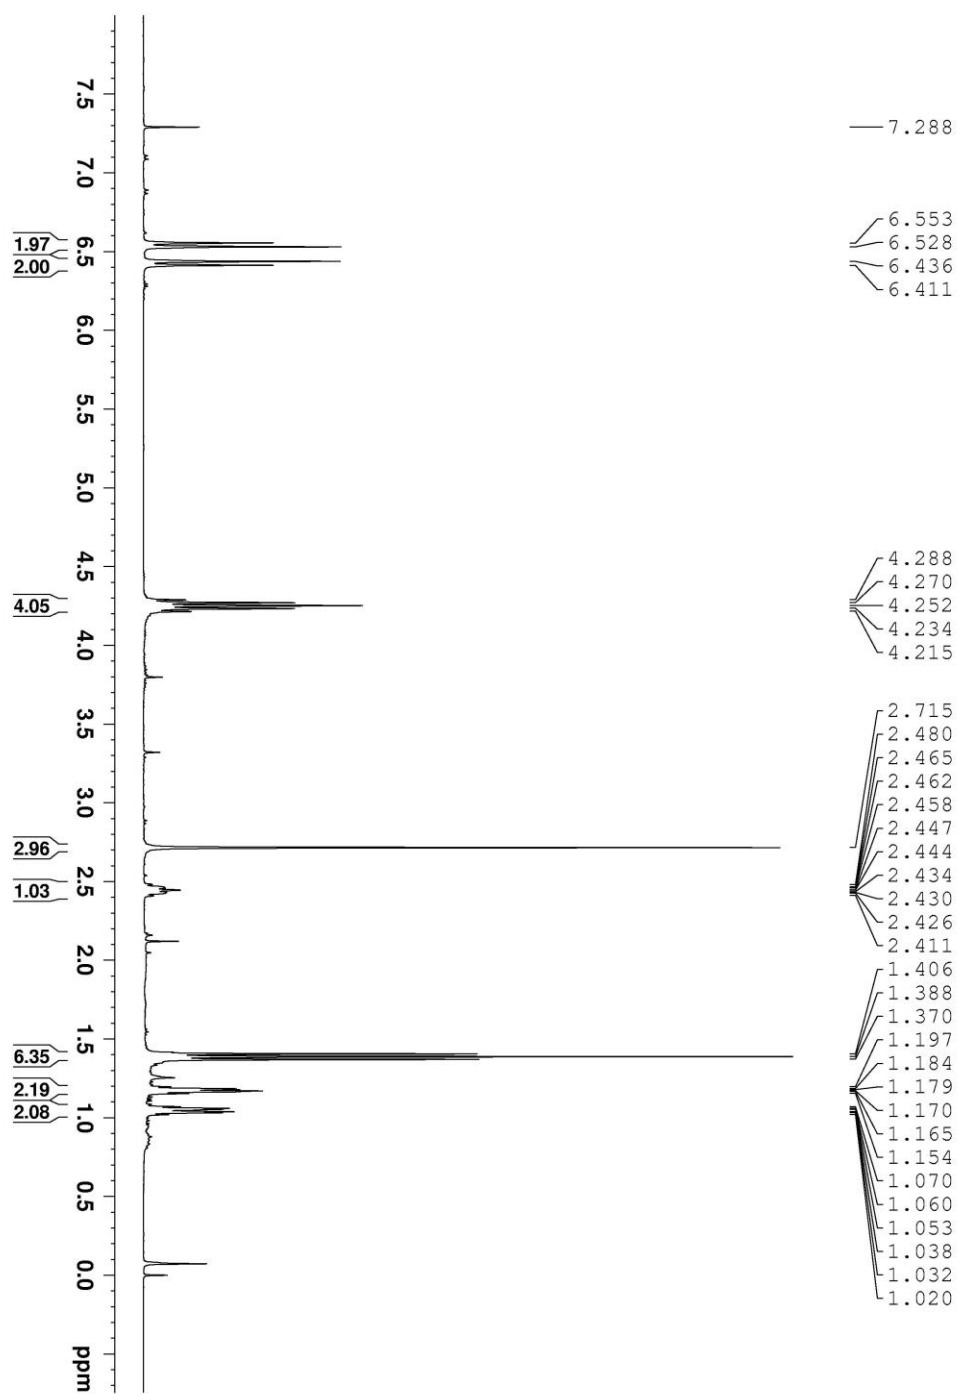

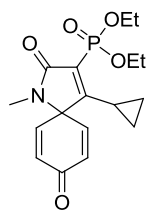

**3o**, 67%

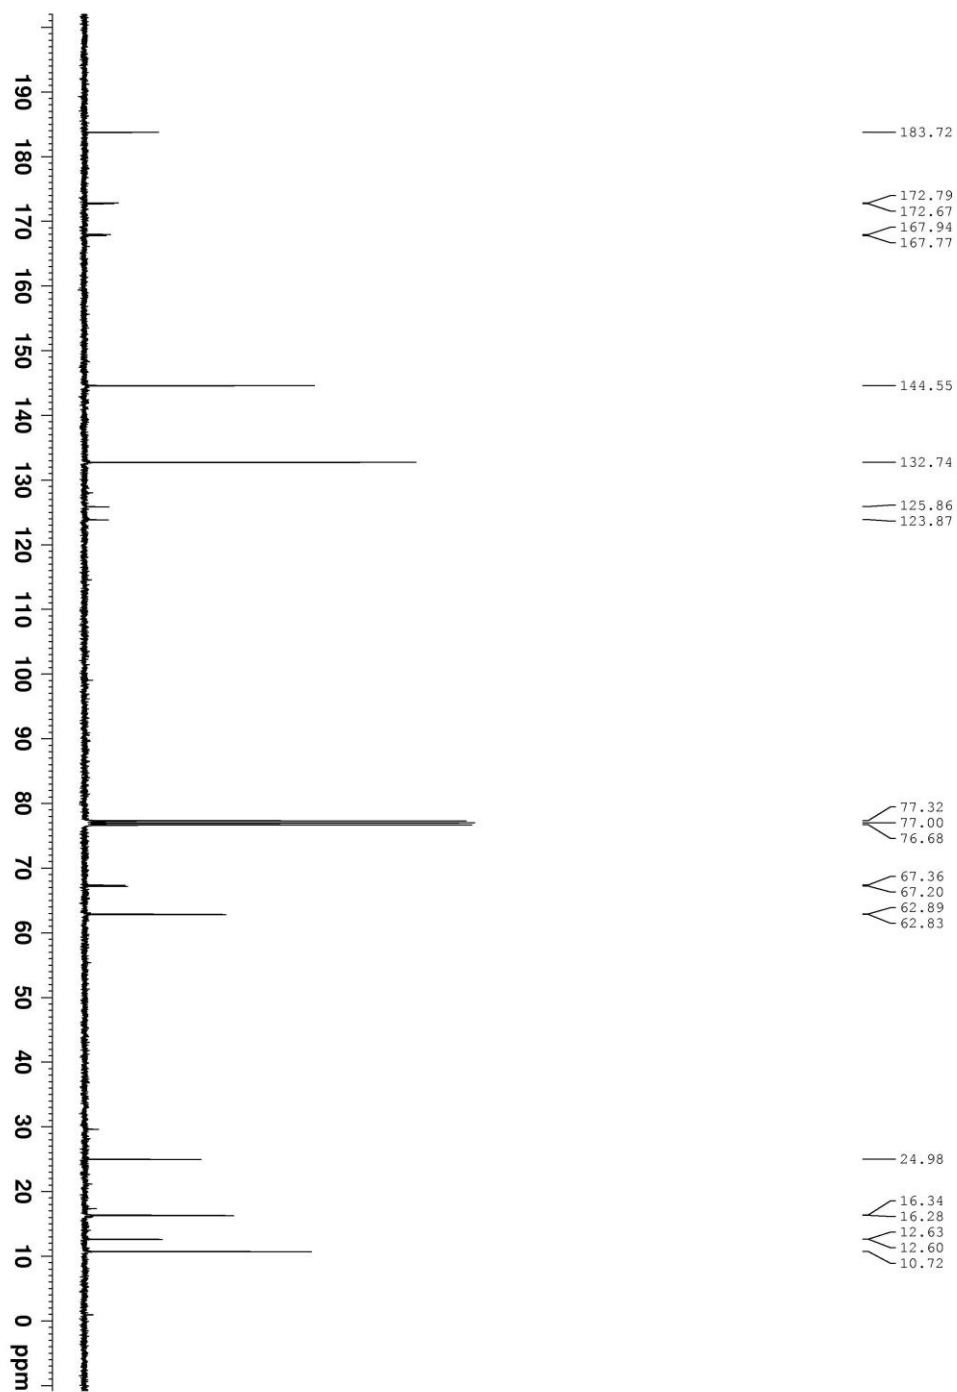



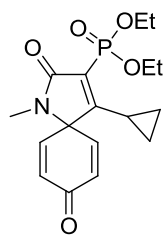

**3o**, 67%

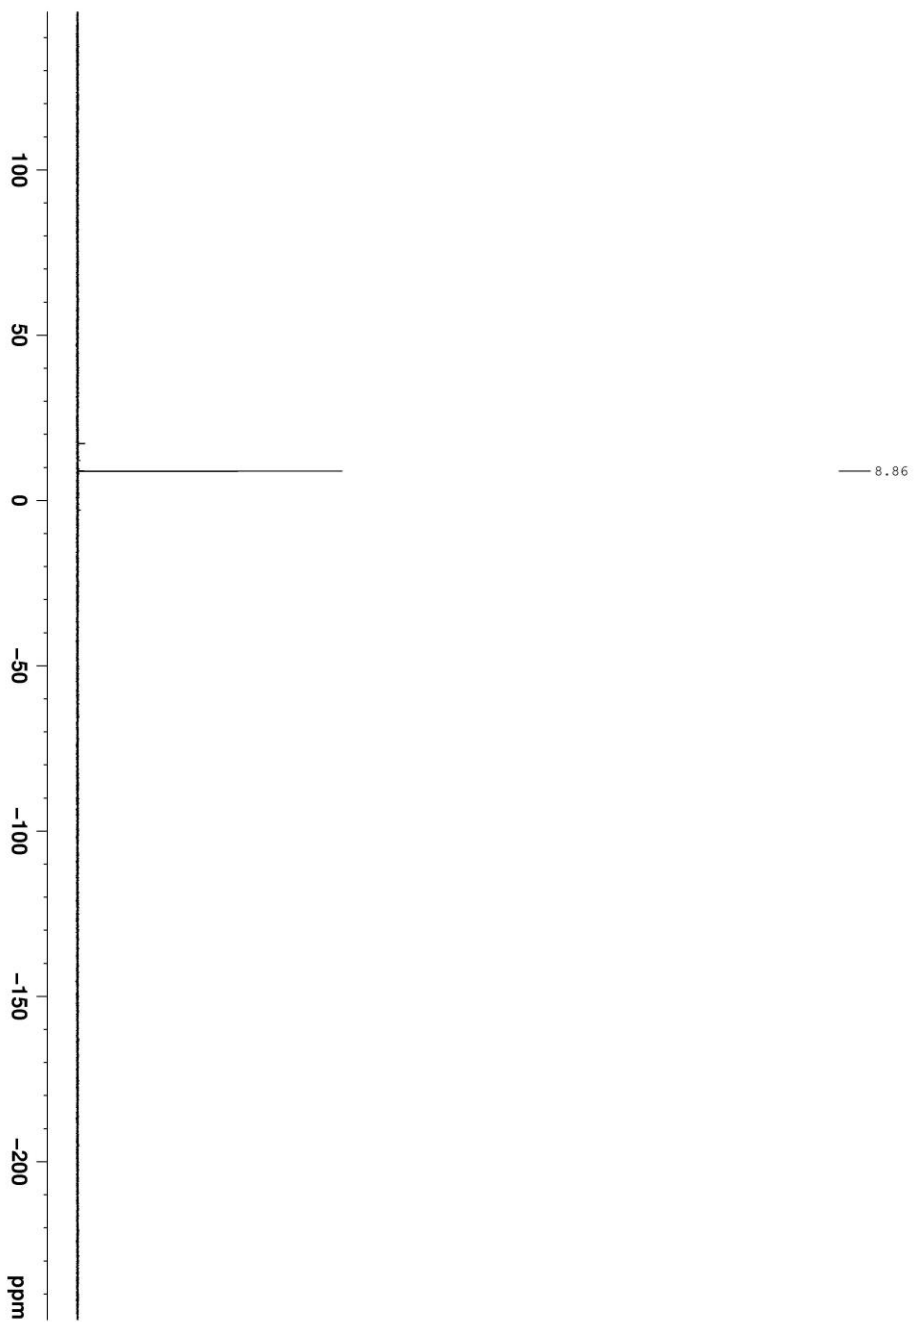

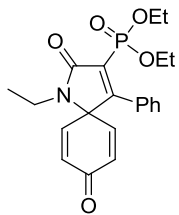

**3p**, 80%

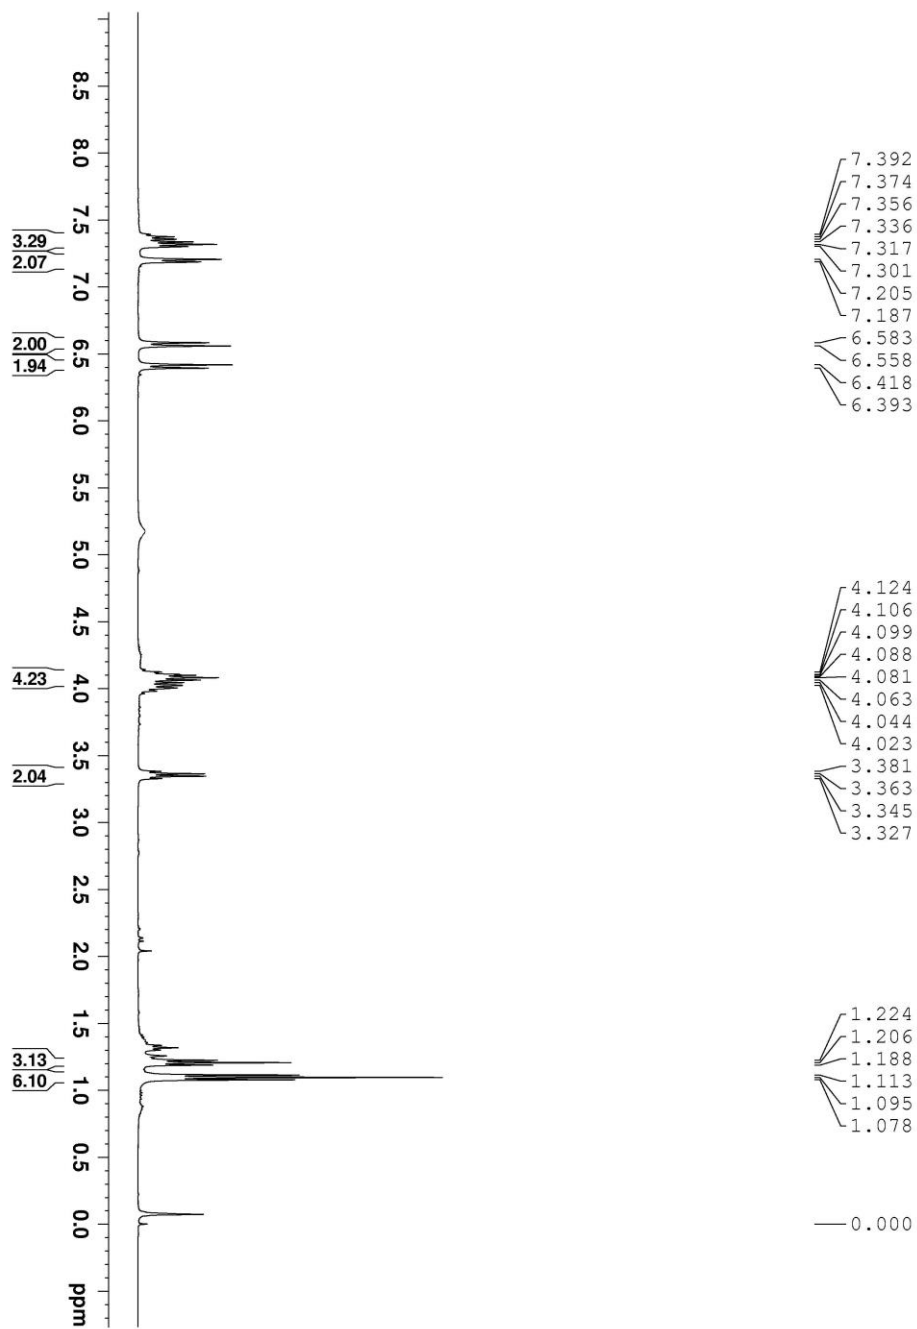

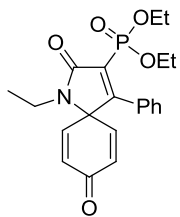

**3p**, 80%

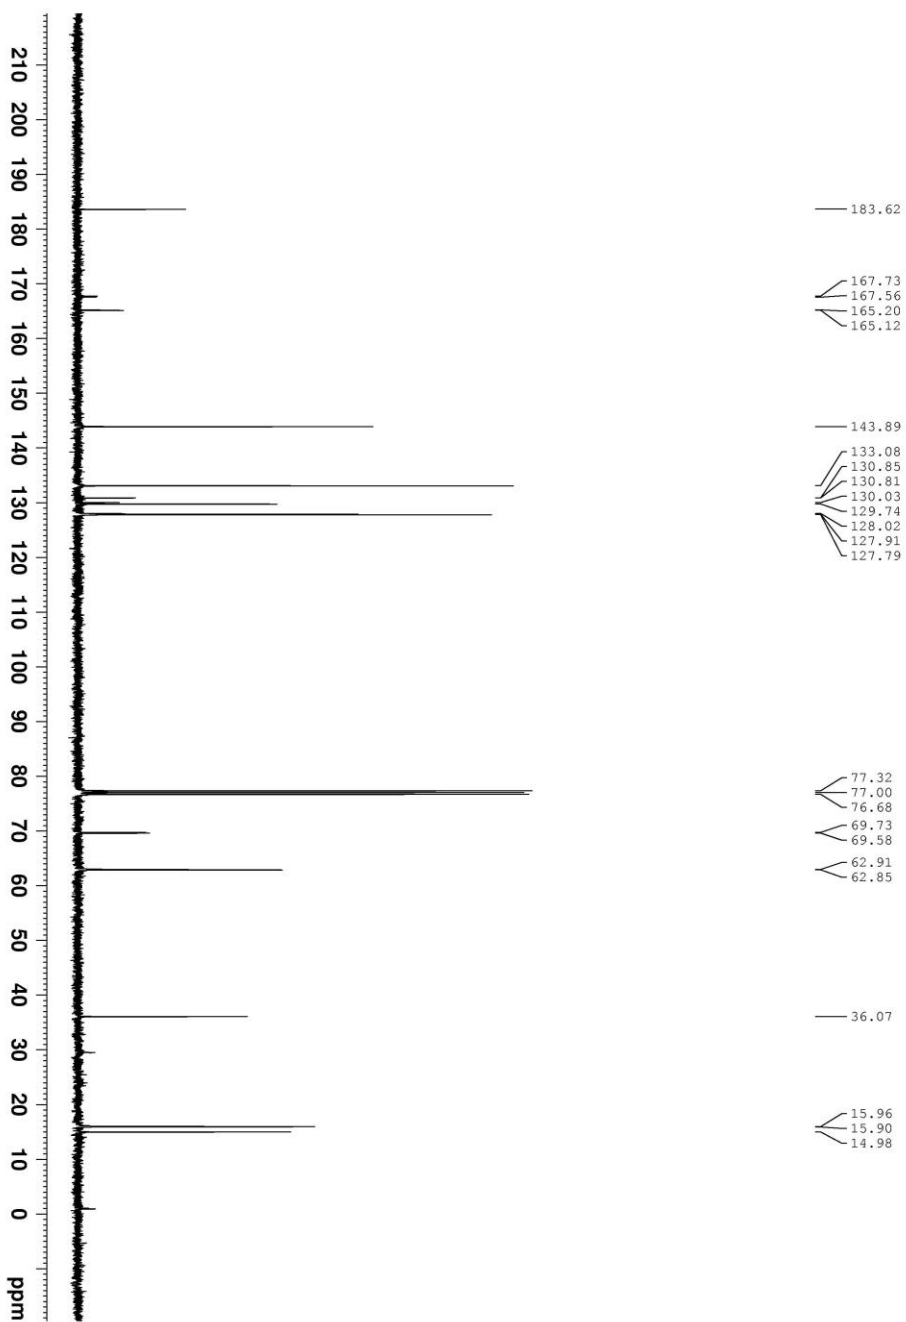

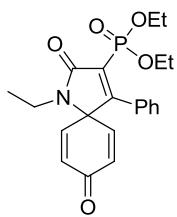

**3p**, 80%

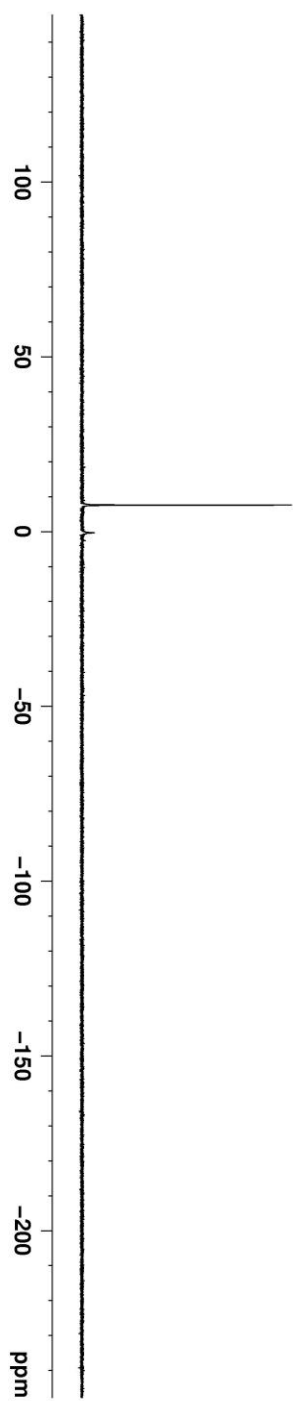

7.60

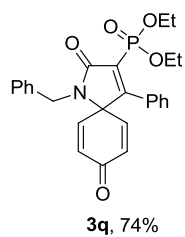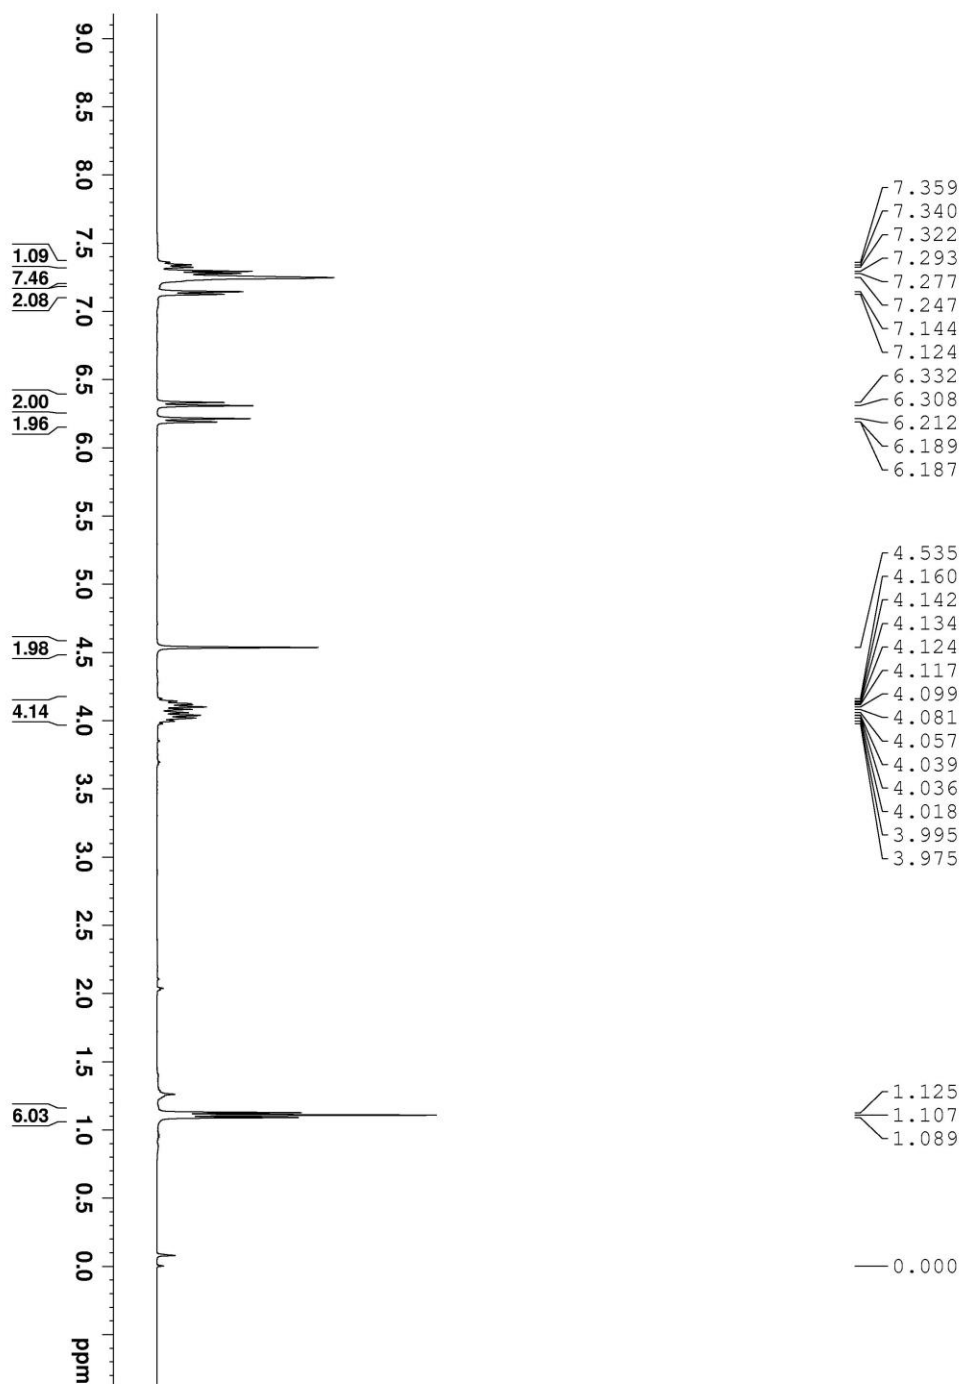

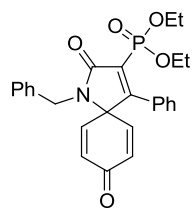

**3q**, 74%

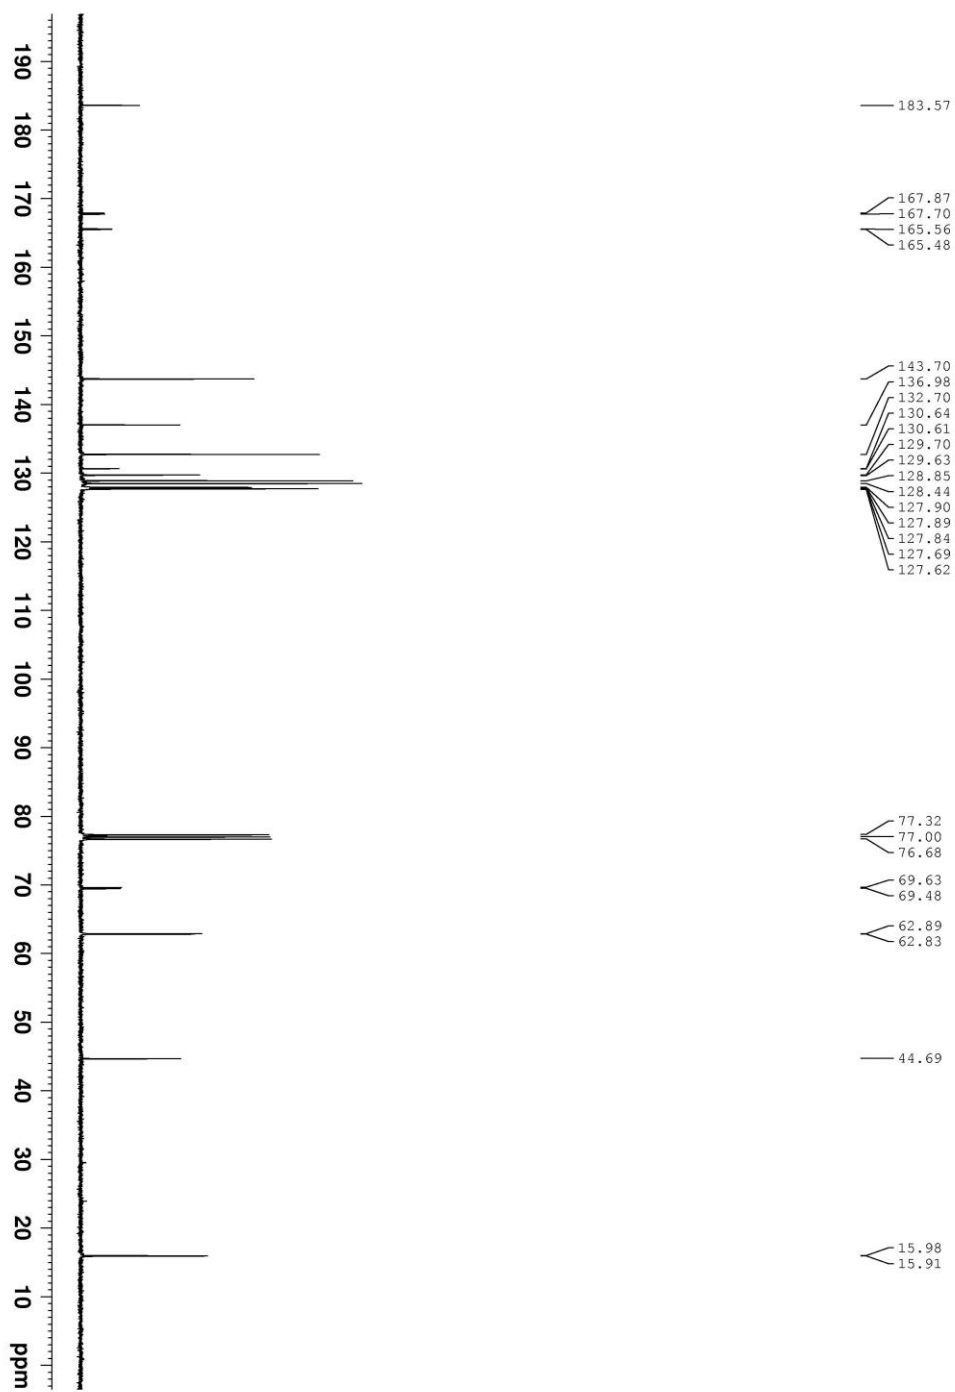

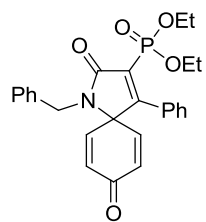

**3q**, 74%

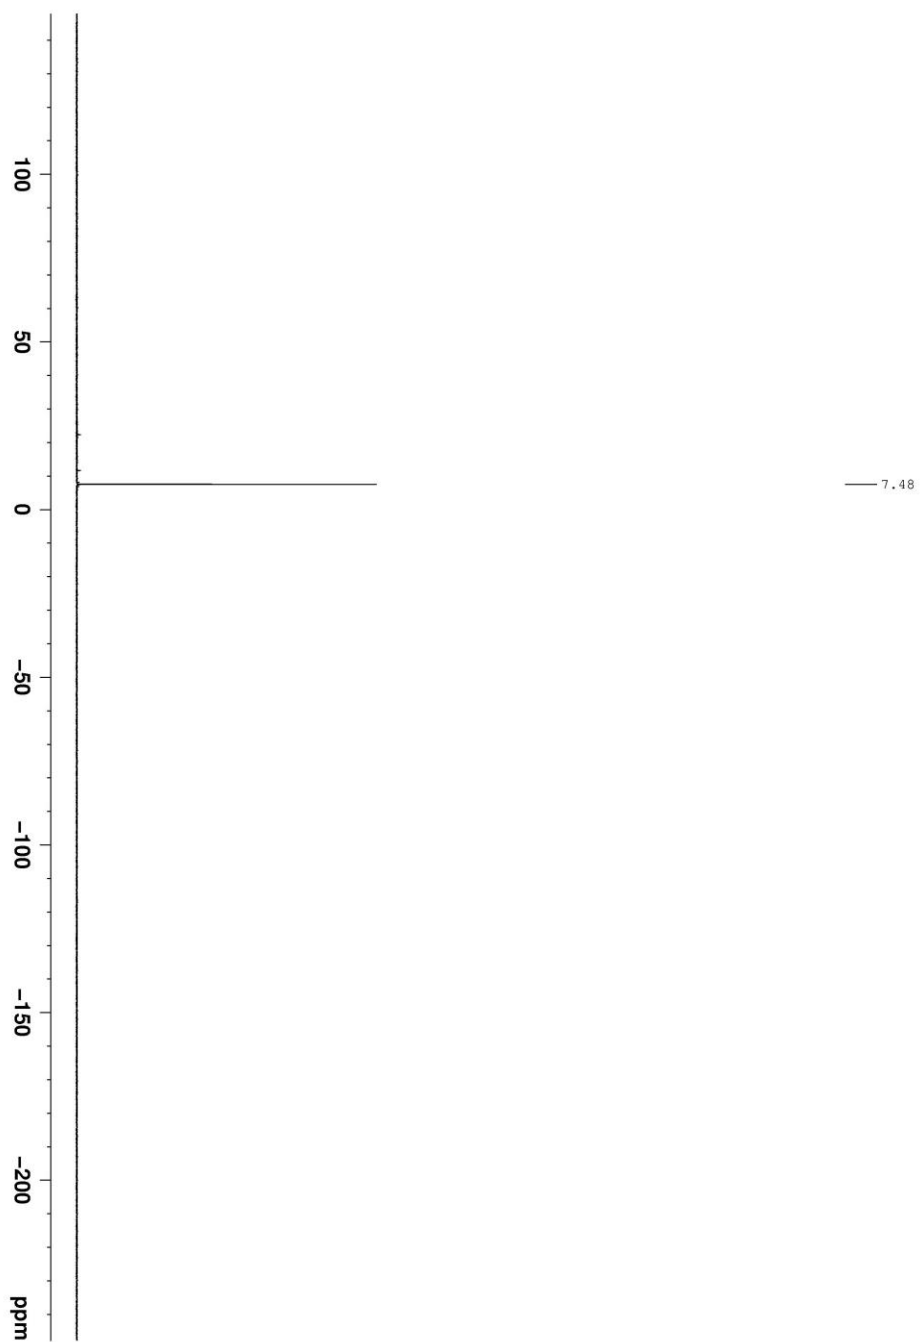

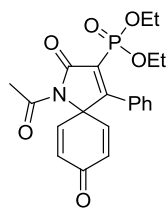

**3r**, 47%

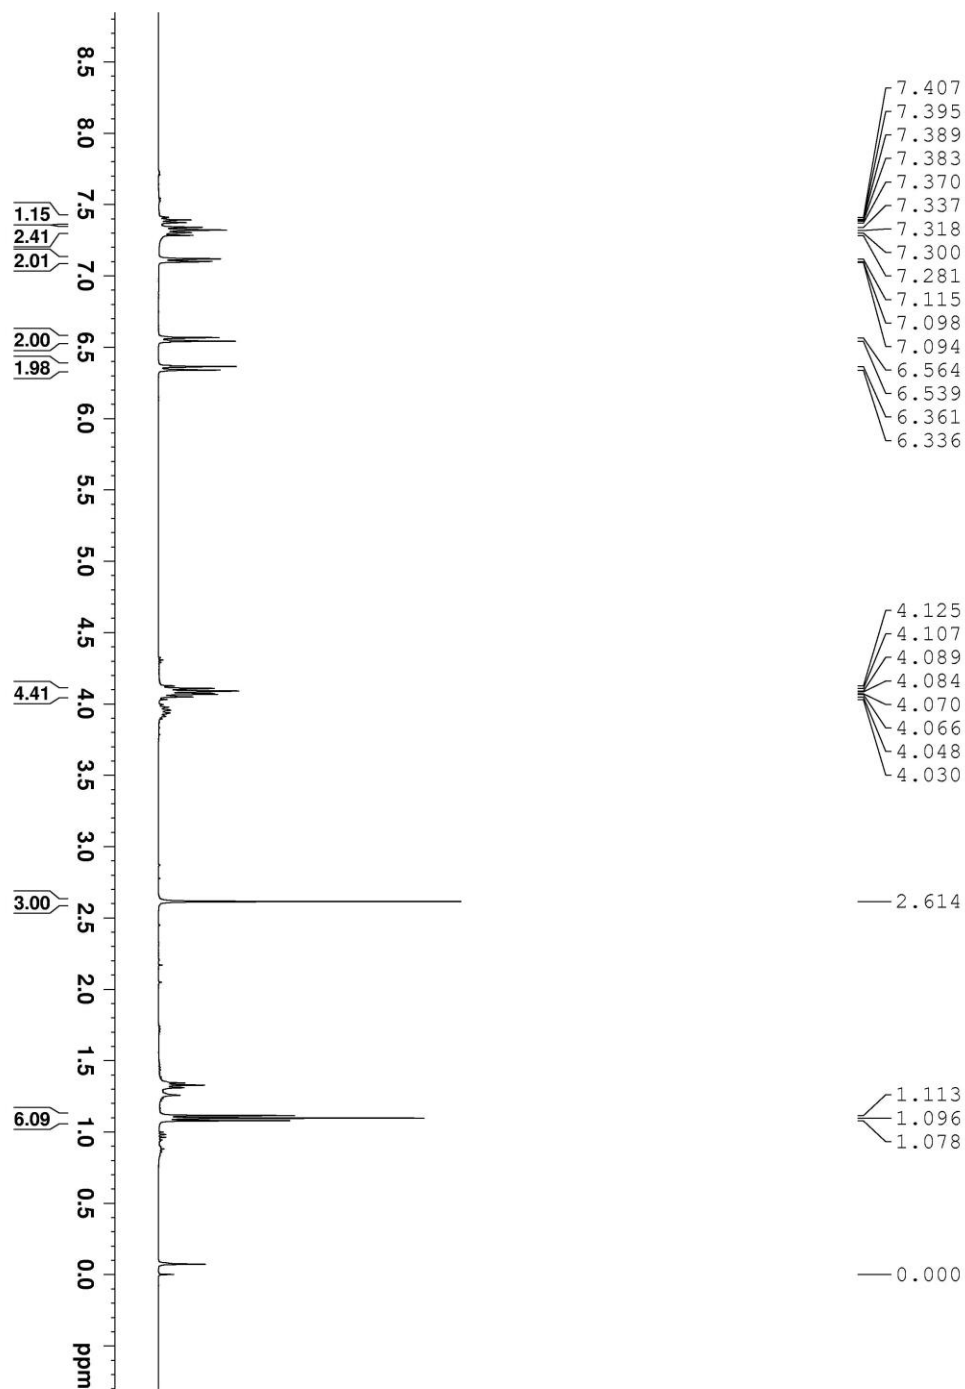



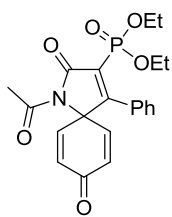

3r, 47%

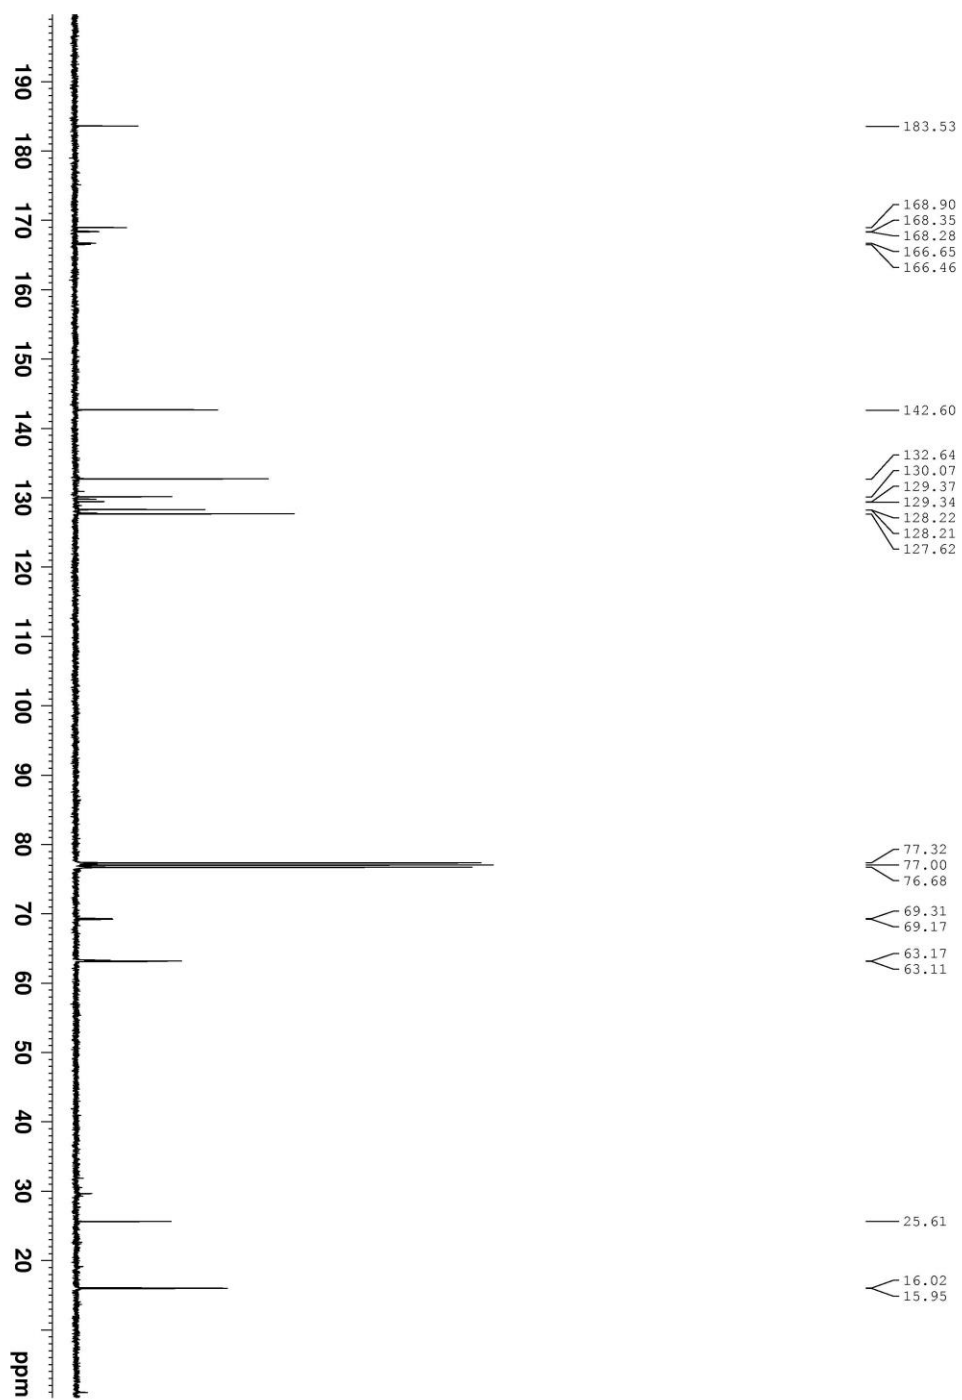

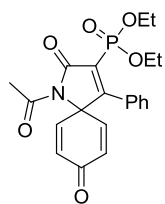

**3r**, 47%

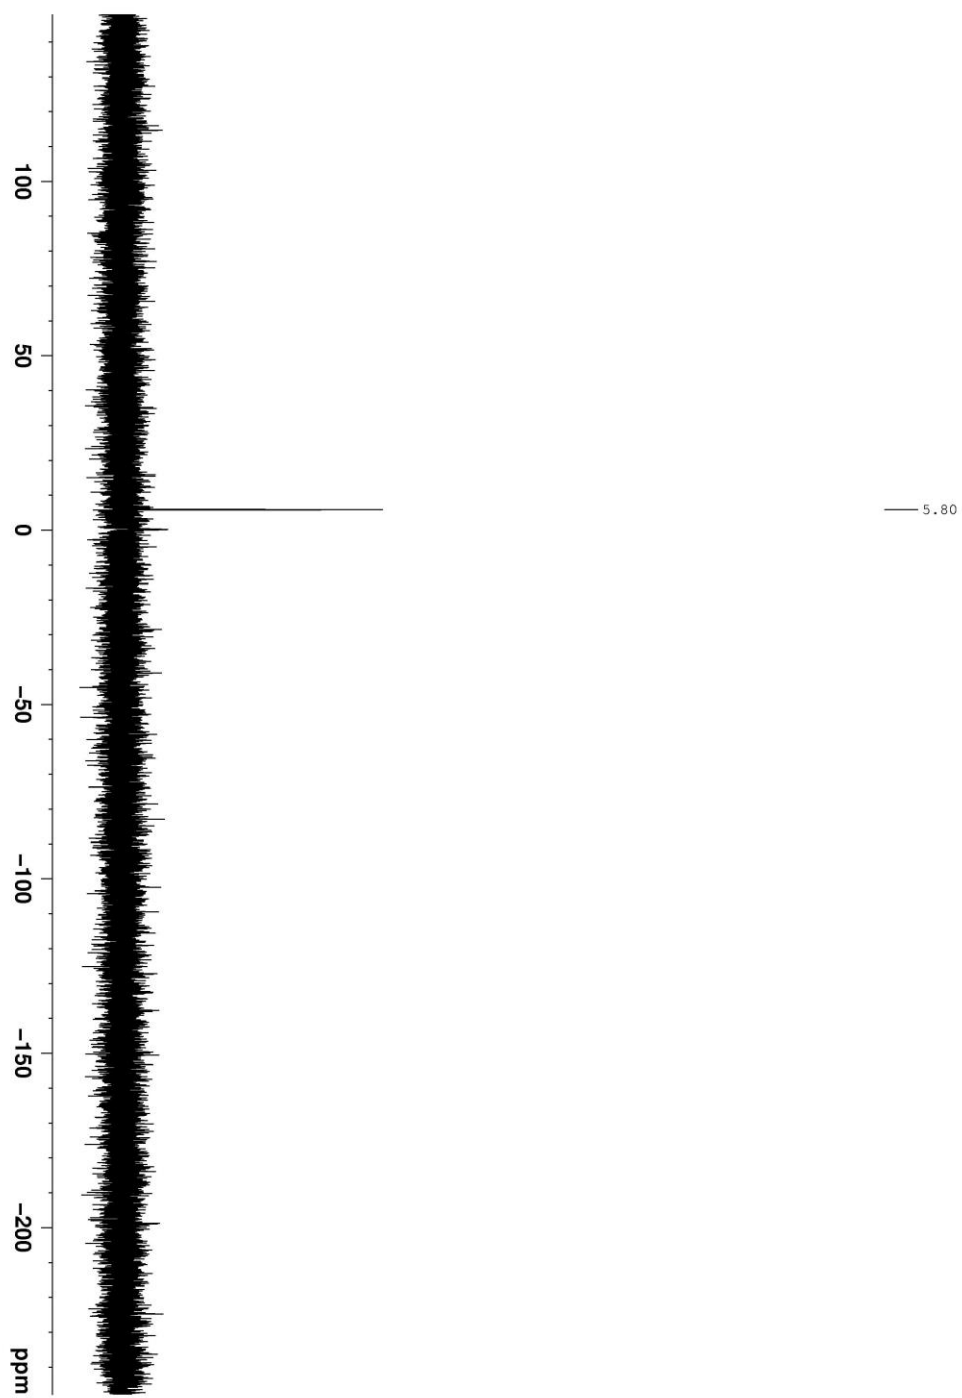

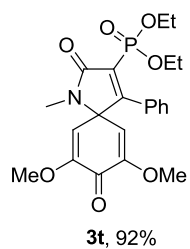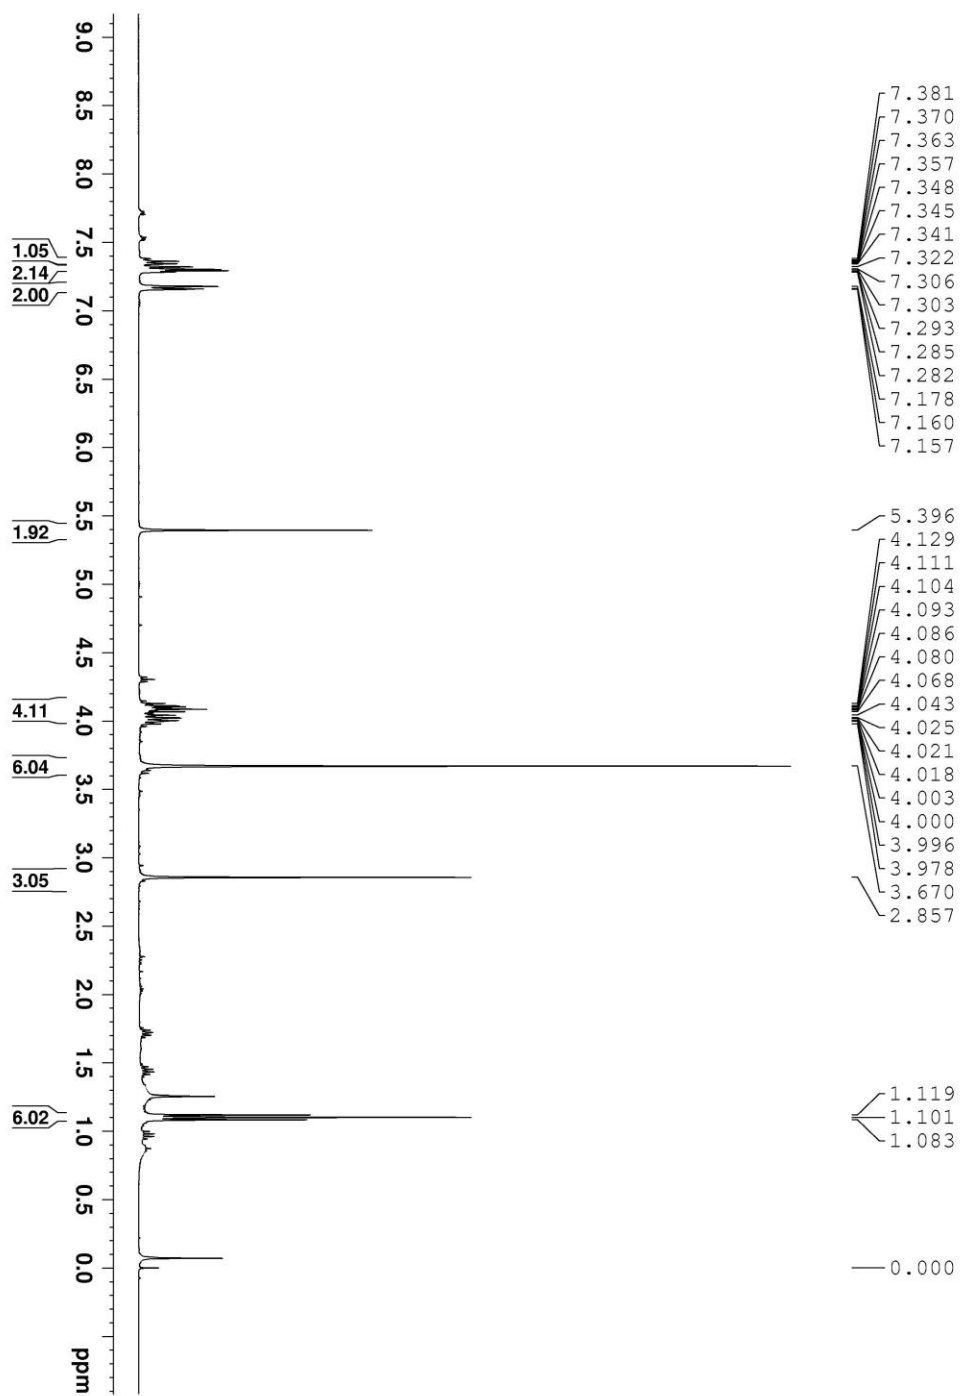

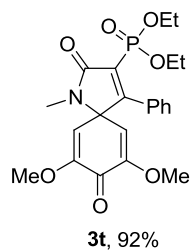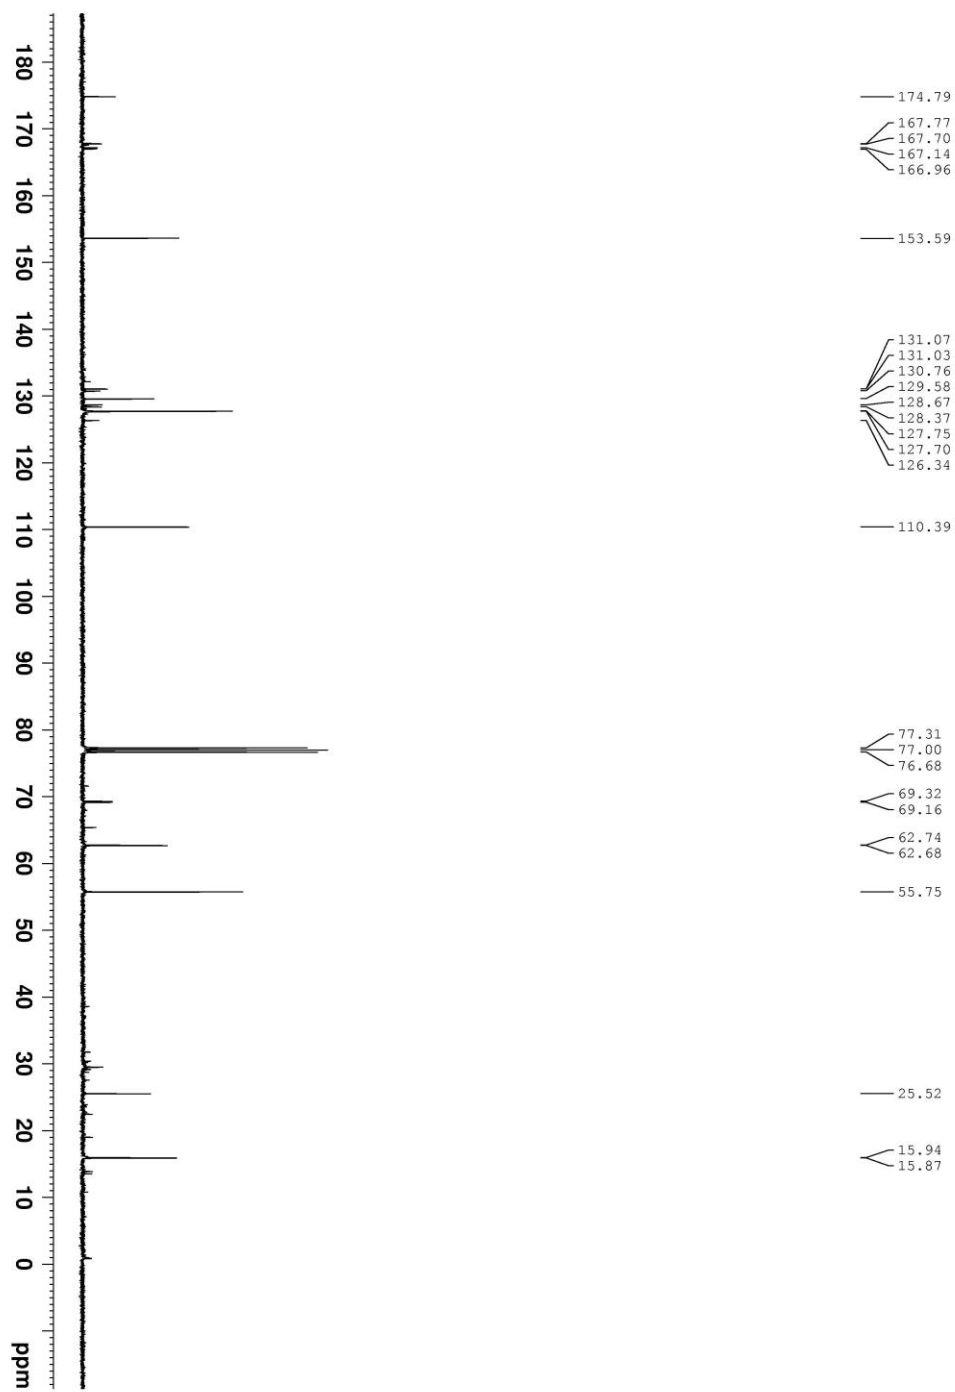

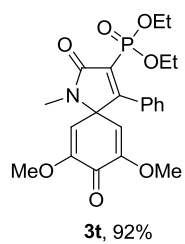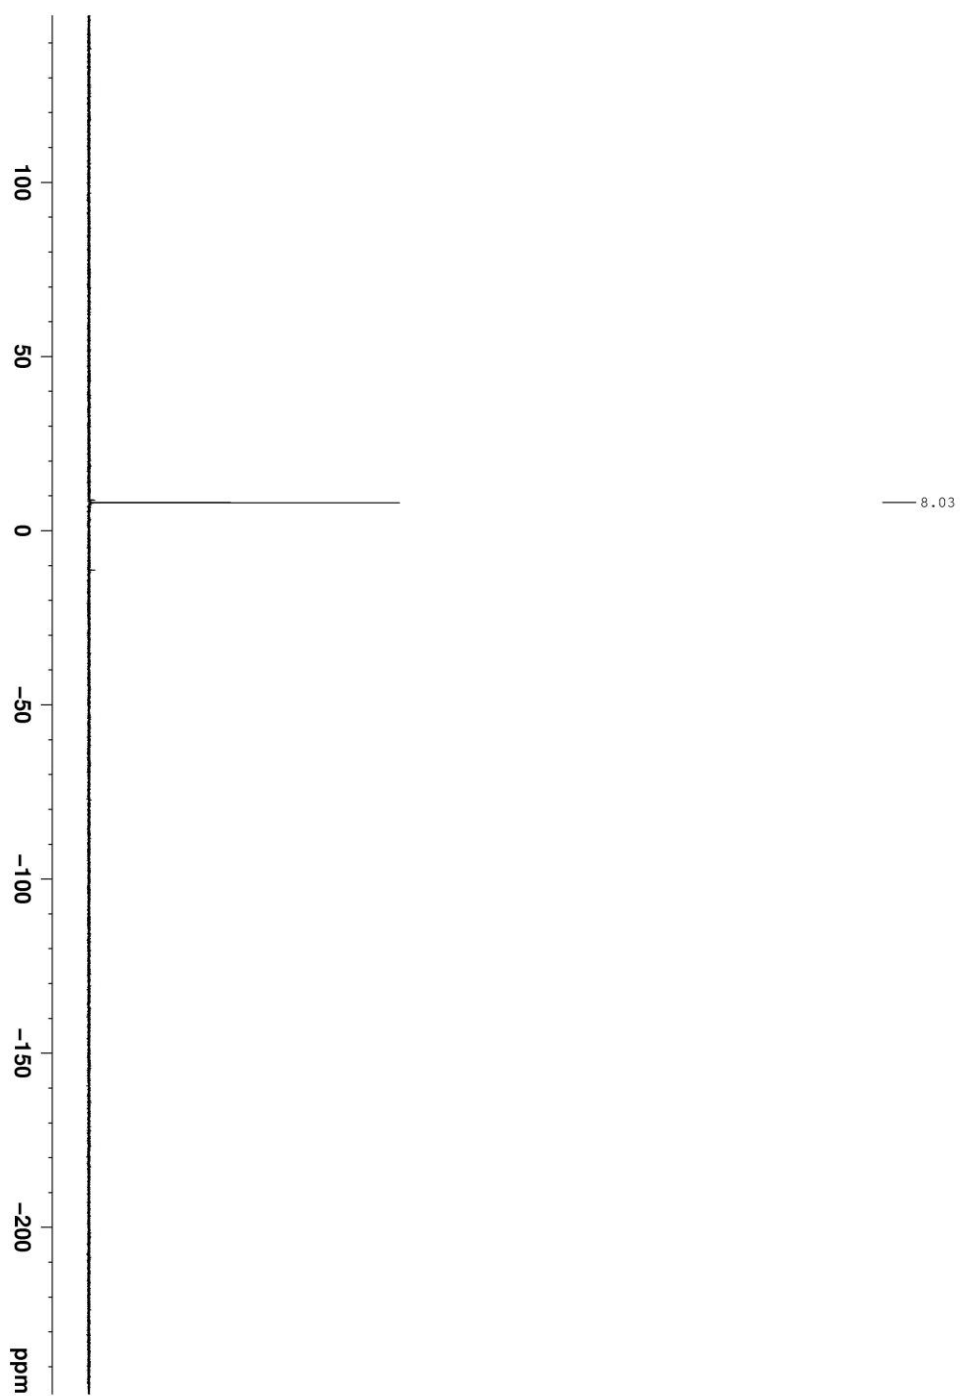

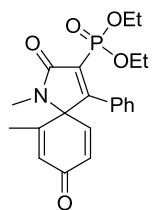

**3u**, 16%

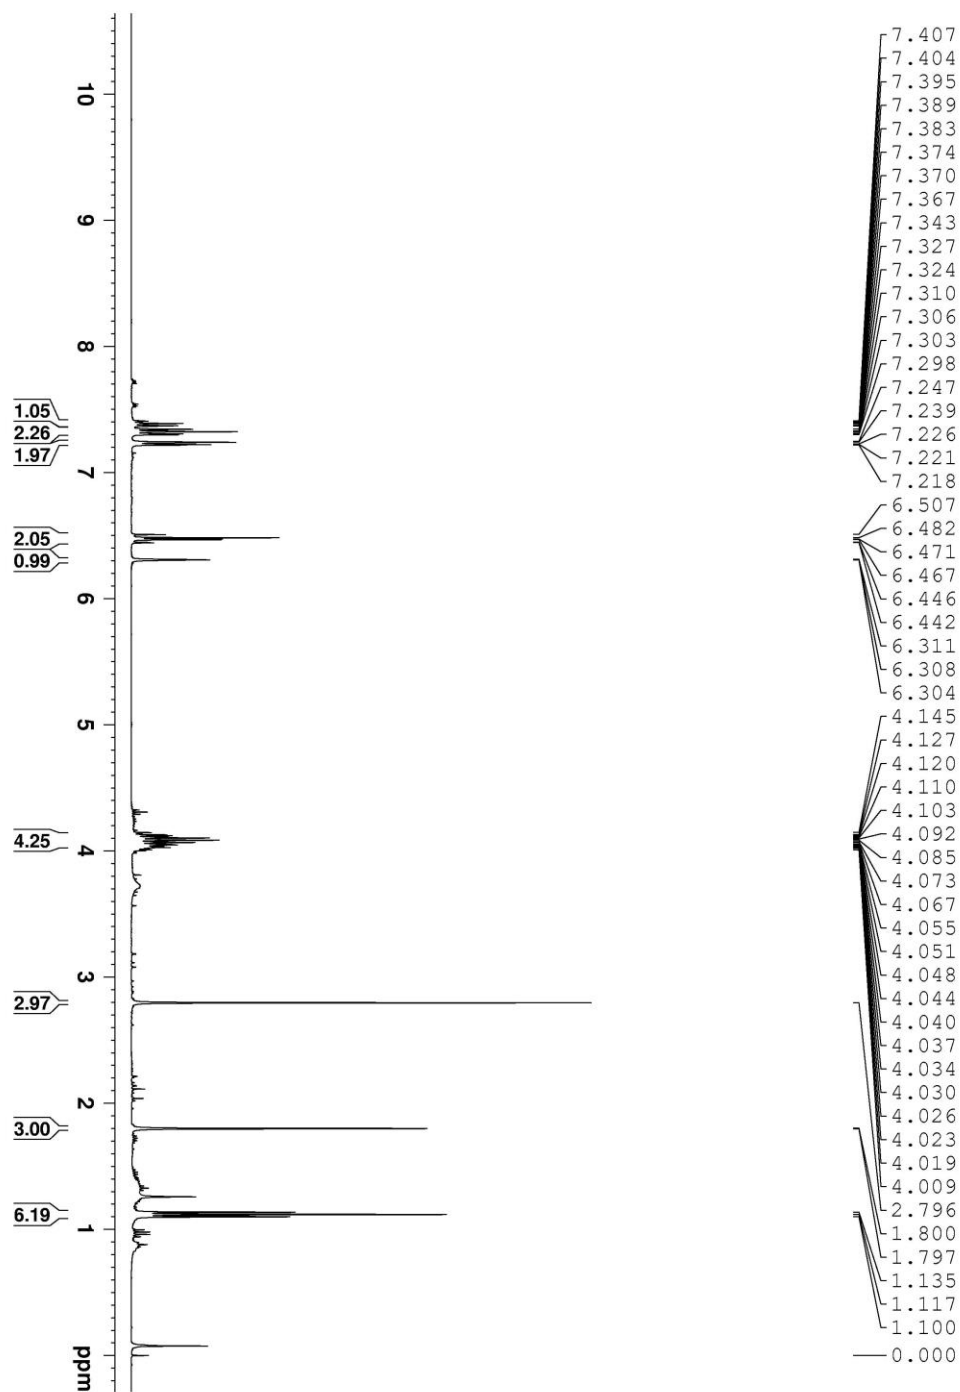



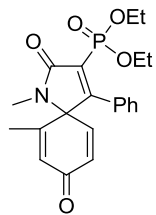

3u, 16%

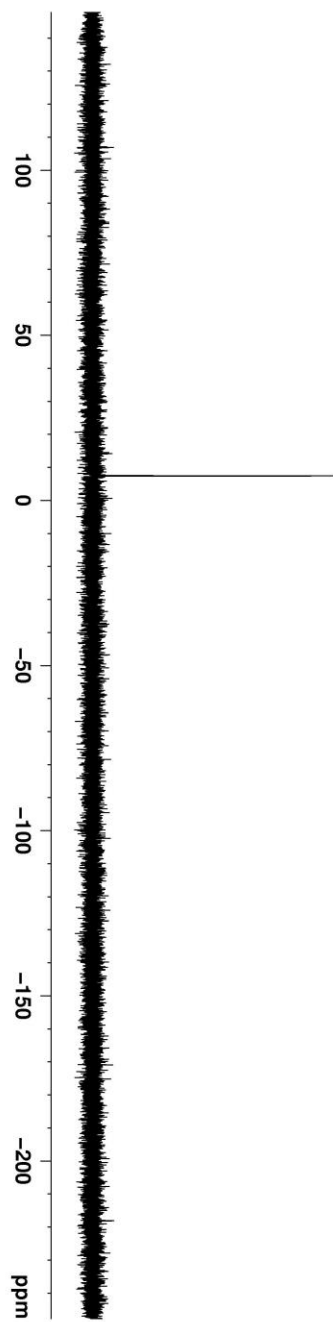

7.38  
7.34
